# Supplementary material for: Direct intermolecular three-component aminotrifluoromethylation of styrenes by visible-light-photoredox catalysis
Source: Royal Society of Chemistry journal article supplement (doi:10.1039/d2qo00985d), 2022-01-01
Supplement: d2qo00985d1.pdf [file d2qo00985d1.pdf]

## ***Supporting Information for***

### **Direct Intermolecular Three-Component Aminotrifluoromethylation of Styrenes by Visible Light Photoredox Catalysis**

Lvyin Zheng,<sup>\*‡</sup> Liuhuan Cai,<sup>‡</sup> Xiaoya Zhuo, Lei Deng, Yingying Wu,  
Bening Yang, Yihan Wang and Wei Guo<sup>\*</sup>

Key Laboratory of Organo-Pharmaceutical Chemistry of Jiangxi Province, Gannan Normal  
University, Ganzhou 341000, China

Fax: (+86) 0797-8393536; \*E-mail: zhenglvyin@126.com; guoweigw@126.com

| <b>Table of Contents</b>                               | <b>Pages</b>   |
|--------------------------------------------------------|----------------|
| <b>1. Optimization of the Reaction Conditions.....</b> | <b>S2-S5</b>   |
| <b>2. GC-MS of 4p.....</b>                             | <b>S6</b>      |
| <b>3. GC-MS of Intermediate 8.....</b>                 | <b>S7</b>      |
| <b>4. Fluorescence Quenching Experiments.....</b>      | <b>S8</b>      |
| <b>5. Cyclic Voltammetry (CV) Experiments.....</b>     | <b>S9</b>      |
| <b>6. Light On/off Experiments.....</b>                | <b>S10</b>     |
| <b>7. Characterization Data.....</b>                   | <b>S11-28</b>  |
| <b>8. NMR Spectra.....</b>                             | <b>S29-S73</b> |

## 1. Optimization of the Reaction Conditions

**Table S1. The Effect of the Amount of Rose bengal for 4a<sup>a</sup>**

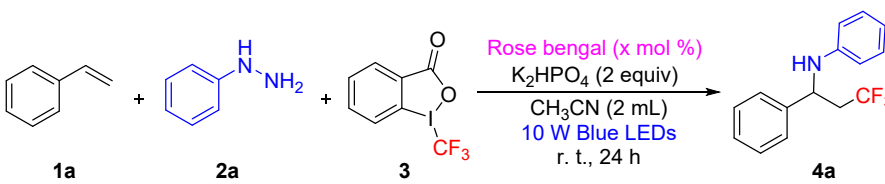

| entry | Rose bengal (x mol %) | yield (%) |
|-------|-----------------------|-----------|
| 1     | 1                     | 62        |
| 2     | 2                     | 58        |
| 3     | 3                     | 57        |
| 4     | 4                     | 57        |

<sup>a</sup>Reaction conditions: **1a** (0.1 mmol), **2a** (0.3 mmol), **3** (0.3 mmol), K<sub>2</sub>HPO<sub>4</sub> (2 equiv), and Rose bengal (x mol %) in CH<sub>3</sub>CN (2 mL), under a 10 W blue LEDs irradiation (465 nm) at room temperature for 24 h in the open air. Isolated yields based on **1a**.

**Table S2. The Effect of the Amount of 2a for 4a<sup>a</sup>**

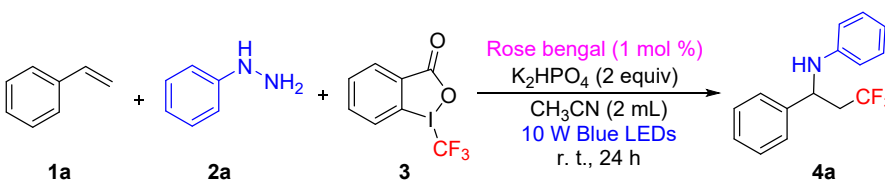

| entry | <b>2a</b> (x mmol) | yield (%) |
|-------|--------------------|-----------|
| 1     | 0.10               | 28        |
| 2     | 0.15               | 33        |
| 3     | 0.20               | 42        |
| 4     | 0.30               | 62        |

<sup>a</sup>Reaction conditions: **1a** (0.1 mmol), **2a** (x mmol), **3** (0.3 mmol), K<sub>2</sub>HPO<sub>4</sub> (2 equiv), and Rose bengal (1 mol %) in CH<sub>3</sub>CN (2 mL), under a 10 W blue LEDs irradiation (465 nm) at room temperature for 24 h in the open air. Isolated yields based on **1a**.

**Table S3. The Effect of the Amount of 3 for 4a<sup>a</sup>**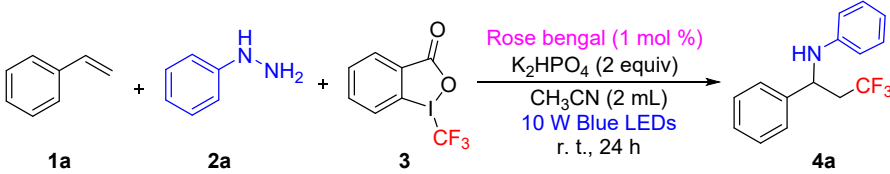

| entry | 3 (x mmol) | yield (%) |
|-------|------------|-----------|
| 1     | 0.10       | 23        |
| 2     | 0.20       | 50        |
| 3     | 0.30       | 62        |
| 4     | 0.40       | 63        |

<sup>a</sup>Reaction conditions: **1a** (0.1 mmol), **2a** (0.3 mmol), **3** (x mmol), K<sub>2</sub>HPO<sub>4</sub> (2 equiv), and Rose bengal (1 mol %) in CH<sub>3</sub>CN (2 mL), under a 10 W blue LEDs irradiation (465 nm) at room temperature for 24 h in the open air. Isolated yields based on **1a**.

**Table S4. The Effect of the Amount of K<sub>2</sub>HPO<sub>4</sub> for 4a<sup>a</sup>**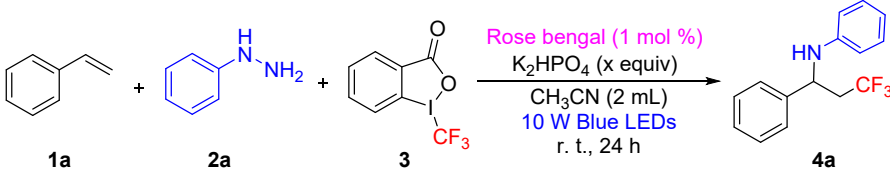

| entry | K <sub>2</sub> HPO <sub>4</sub> (x equiv) | yield (%) |
|-------|-------------------------------------------|-----------|
| 1     | 1.0                                       | 40        |
| 2     | 1.5                                       | 58        |
| 3     | 2.0                                       | 62        |
| 4     | 3.0                                       | 59        |

<sup>a</sup>Reaction conditions: **1a** (0.1 mmol), **2a** (0.3 mmol), **3** (0.3 mmol), K<sub>2</sub>HPO<sub>4</sub> (x equiv), and Rose bengal (1 mol %) in CH<sub>3</sub>CN (2 mL), under a 10 W blue LEDs irradiation (465 nm) at room temperature for 24 h in the open air. Isolated yields based on **1a**.

**Table S5. The Effect of Reaction Temperature for 4a<sup>a</sup>**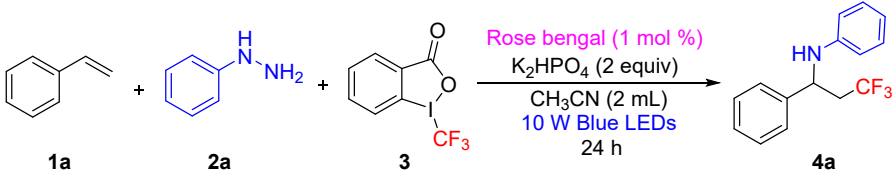

| entry | T (°C) | yield (%) |
|-------|--------|-----------|
| 1     | 25     | 62        |
| 2     | 40     | 60        |
| 3     | 60     | 51        |
| 4     | 80     | 39        |

<sup>a</sup>Reaction conditions: **1a** (0.1 mmol), **2a** (0.3 mmol), **3** (0.3 mmol), K<sub>2</sub>HPO<sub>4</sub> (2 equiv), and Rose bengal (1 mol %) in CH<sub>3</sub>CN (2 mL), under a 10 W blue LEDs irradiation (465 nm) for 24 h in the open air. Isolated yields based on **1a**.

**Table S6. The Effect of Light Sources for 4a<sup>a</sup>**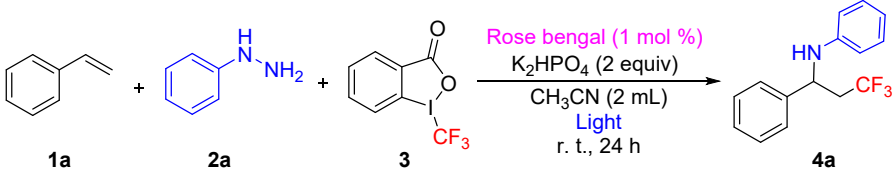

| entry | light sources (10 W) | yield (%) |
|-------|----------------------|-----------|
| 1     | UV LEDs (385 nm)     | 25        |
| 2     | Blue LEDs (440 nm)   | 34        |
| 3     | Blue LEDs (465 nm)   | 62        |
| 4     | Green LEDs (550 nm)  | 23        |
| 5     | White LEDs (6000k)   | 20        |

<sup>a</sup>Reaction conditions: **1a** (0.1 mmol), **2a** (0.3 mmol), **3** (0.3 mmol), K<sub>2</sub>HPO<sub>4</sub> (2 equiv), and Rose bengal (1 mol %) in CH<sub>3</sub>CN (2 mL), under light irradiation for 24 h in the open air. Isolated yields based on **1a**.

**Table S7. The Effect of Reaction Time for 4a<sup>a</sup>**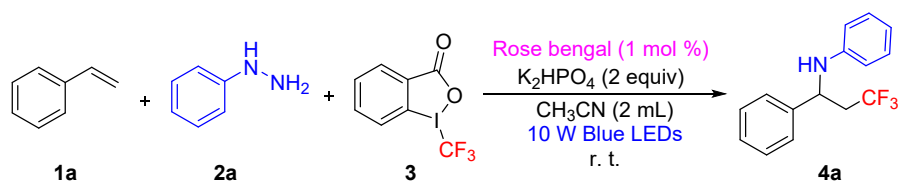

| entry | reaction time (h) | yield (%) |
|-------|-------------------|-----------|
| 1     | 12                | 49        |
| 2     | 18                | 56        |
| 3     | 24                | 62        |
| 4     | 36                | 60        |
| 5     | 48                | 58        |

<sup>a</sup>Reaction conditions: **1a** (0.1 mmol), **2a** (0.3 mmol), **3** (0.3 mmol),  $K_2HPO_4$  (2 equiv), and Rose bengal (1 mol %) in  $CH_3CN$  (2 mL), under a 10 W blue LEDs irradiation (465 nm) at room temperature in the open air. Isolated yields based on **1a**.

**Table S8. Screening Reaction Conditions for 7a<sup>a</sup>**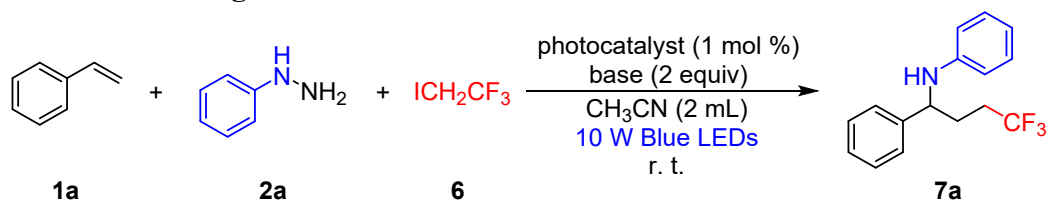

| entry | photocatalyst (1 mol %)          | base (2 equiv) | yield (%) |
|-------|----------------------------------|----------------|-----------|
| 1     | Rose Bengal                      | $K_2HPO_4$     | 0         |
| 2     | Eosin Y                          | $K_2HPO_4$     | 0         |
| 3     | <i>fac</i> -Ir(ppy) <sub>3</sub> | $K_2HPO_4$     | trace     |
| 4     | $Ru(phen)_3Cl_2$                 | $K_2HPO_4$     | 50%       |
| 5     | $Ru(phen)_3Cl_2$                 | DBU            | 30%       |
| 6     | $Ru(phen)_3Cl_2$                 | $NEt_3$        | 28%       |
| 7     | $Ru(phen)_3Cl_2$                 | $K_2CO_3$      | 40%       |
| 8     | $Ru(phen)_3Cl_2$                 | $K_3PO_4$      | 45%       |

<sup>a</sup>Reaction conditions: **1a** (0.1 mmol), **2a** (0.3 mmol), **6** (0.3 mmol), base (2 equiv), and photocatalyst (1 mol %) in  $CH_3CN$  (2 mL), under a 10 W blue LEDs irradiation (465 nm) at room temperature for 24 h in the open air. Isolated yields based on **1a**.

## 2. GC-MS of 4p

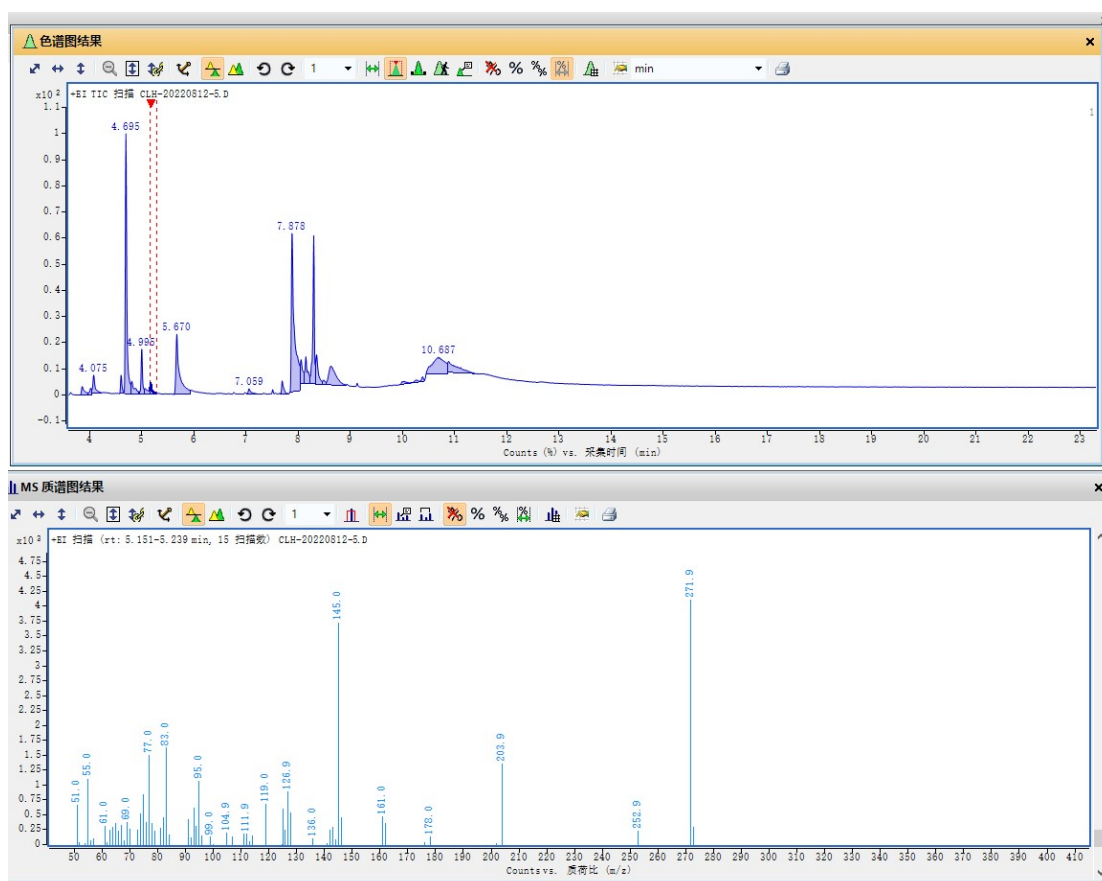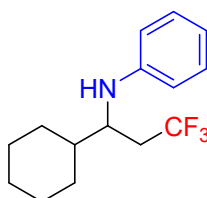

**Figure S1: GC-MS of 4p**

The retention time: 5.151 min; MS (EI, 70 eV)  $m/z$ : 271, 252, 203, 178, 145.

### 3. GC-MS of Intermediate 8

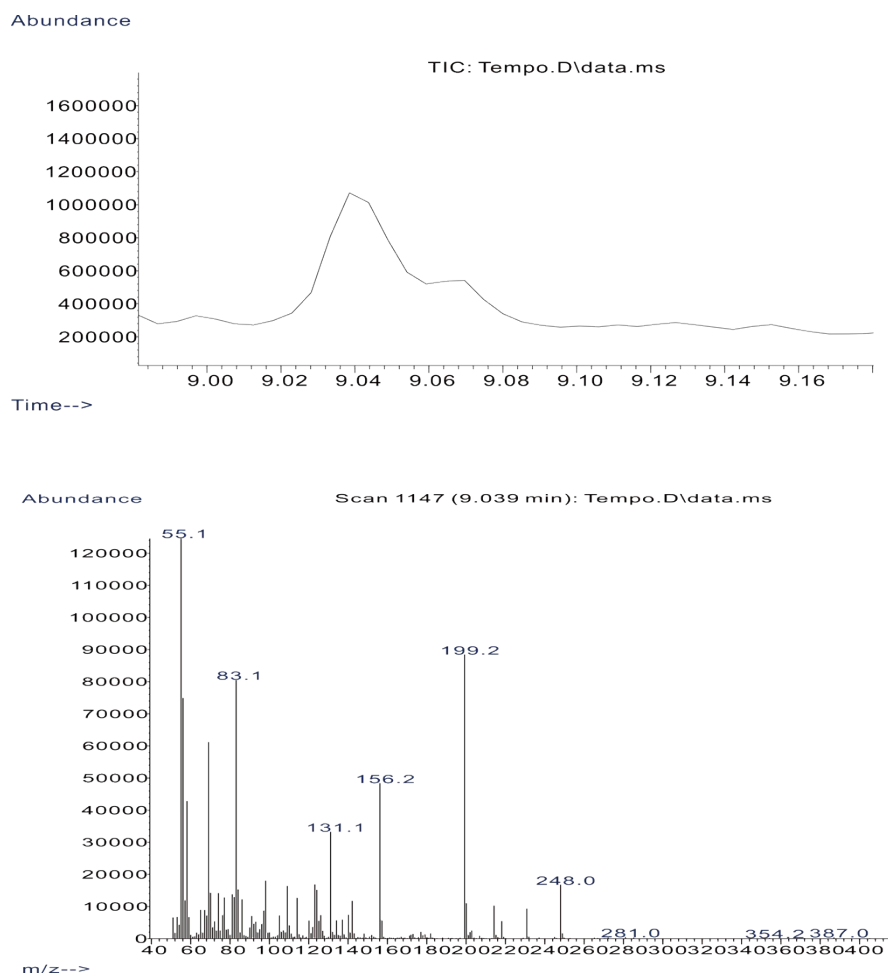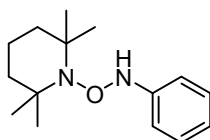

M: 248  
Detected by GC-MS

**Figure S2: GC-MS of intermediate 8**

The retention time: 9.039 min; MS (EI, 70 eV)  $m/z$ : 248, 199, 156, 131, 83.

#### 4. Fluorescence Quenching Experiments

Quenched by **2a**: For each quenching experiment, the emission intensity of photocatalyst **Rose bengal** ( $1 \times 10^{-5}$  M in THF,  $\lambda_{\text{ex}} = 557$  nm,  $\lambda_{\text{em}} = 578$  nm) with different concentration of quencher **Rose bengal** (0, 1.0, 2.0, 3.0, 4.0, 5.0 mM) was collected. As shown in Figure S2, compound **2a** was capable of quenching the excited state of photocatalyst **Rose bengal**.

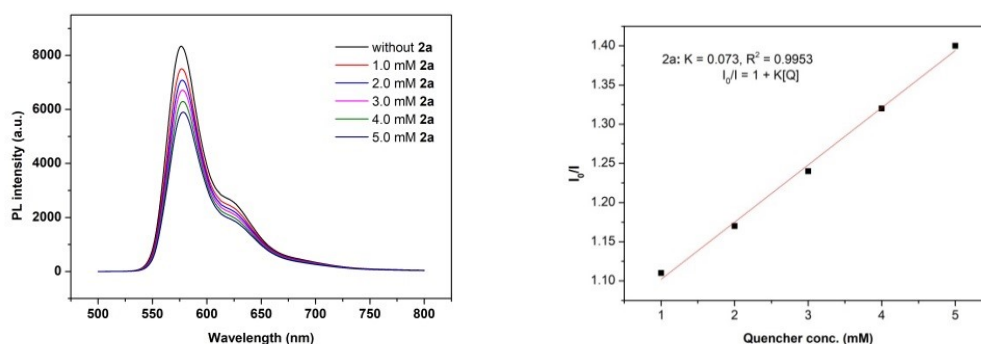

**Figure S3** The Fluorescence Emission Spectra of a Solution of **Rose bengal** in THF Containing Different Concentration of Compound **2a** and Stern-Volmer Graph

Quenched by compound **3**: For each quenching experiment, the emission intensity of photocatalyst **Rose bengal** ( $1 \times 10^{-5}$  M in THF,  $\lambda_{\text{ex}} = 557$  nm,  $\lambda_{\text{em}} = 578$  nm) with different concentration of quencher **3** (0, 1.0, 2.0, 3.0, 4.0, 5.0 mM) was collected. As shown in Figure S3, compound **3** was capable of quenching the excited state of photocatalyst **Rose bengal**.

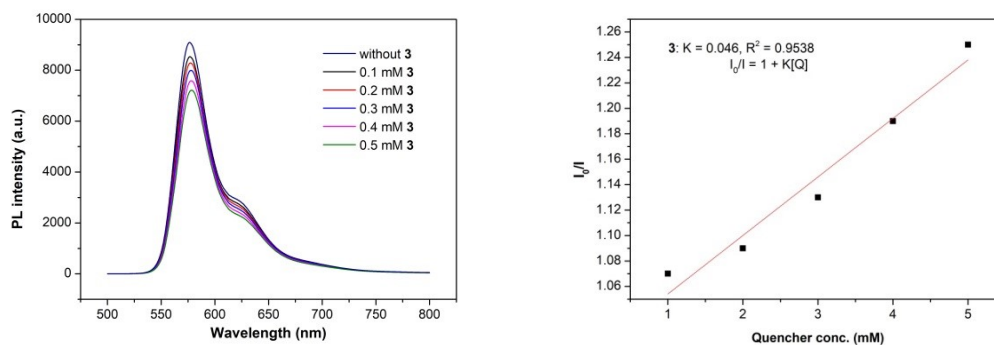

**Figure S4** The Fluorescence Emission Spectra of a Solution of **PC 3** in THF Containing Different Concentration of Compound **4** and Stern-Volmer Graph



## 5. Cyclic Voltammetry (CV) Experiments

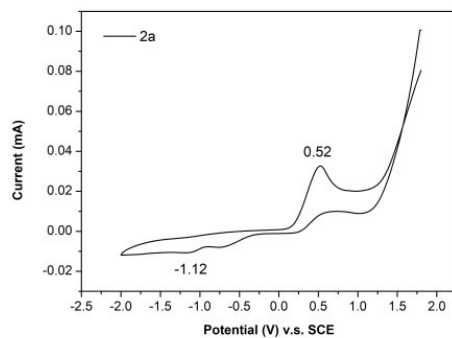

**Figure S5** Cyclic Voltammogram of Compound **2a** in CH<sub>3</sub>CN at 100 mV/s (v.s. SCE)

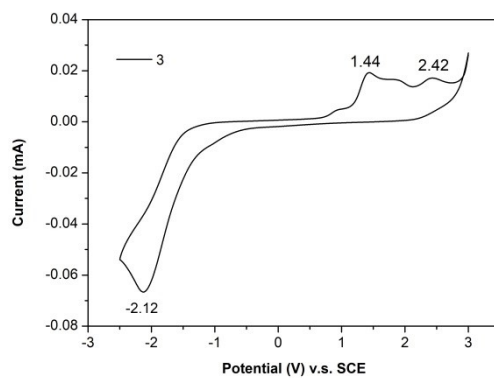

**Figure S6** Cyclic Voltammogram of Compound **3** in CH<sub>3</sub>CN at 100 mV/s (v.s. SCE)

## 6. Light On/off Experiments

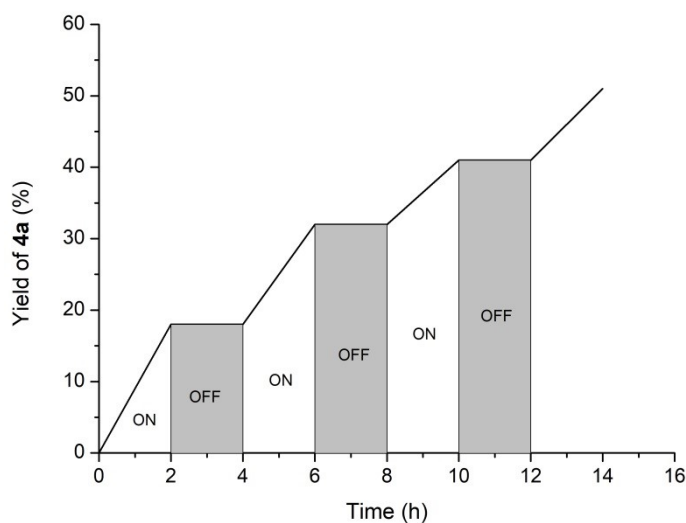

**Figure S7** Light On/off Experiments

The procedures for Light On/off experiments: To a mixture of styrene **1a** (0.1 mmol), phenylhydrazine **2a** (0.3 mmol), Togni's reagent **3** (0.3 mmol), Rose bengal (1 mol %), and CH<sub>3</sub>CN (2 mL) were successively added into a quartz reaction tube with a stir bar. The reaction mixture was separately stirred and irradiated by 10 W blue LEDs (465 nm) at room temperature for 2 h, 4 h, 6 h and 8 h. The desired product **4a** was isolated in 18%, 32%, 41% and 51%, respectively. Additionally, the reaction mixture was stirred and irradiated by 10 W blue LEDs (465 nm) at room temperature for 2 h, then the reaction mixture was continuously stirred in the dark for 2 h, the corresponding product was also obtained in 18% yield. Additionally, when the reaction mixture was stirred and irradiated by 10 W blue LEDs (465 nm) at room temperature for 4 h, then the reaction mixture was continuously stirred in the dark for 2 h, the corresponding product **4a** was obtained in 32% yield. Additionally, when the reaction mixture was stirred and irradiated by 10 W blue LEDs (465 nm) at room temperature for 6 h, then the reaction mixture was continuously stirred in the dark for 2 h, the corresponding product **4a** was still obtained in 41% yield. Additionally, when the reaction mixture was stirred and irradiated by 10 W blue LEDs (465 nm) at room temperature for 8 h, the corresponding product **4a** was still obtained in 51% yield.

## 7. Characterization Data

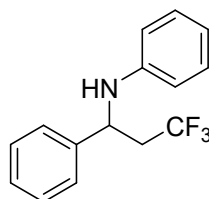

*N*-(3,3,3-Trifluoro-1-phenylpropyl)aniline (**4a**). Eluent: petroleum ether/ethyl acetate (v/v = 30:1). Yellow liquid: 62% yield (16.5 mg, 0.06 mmol); IR (KBr,  $\text{cm}^{-1}$ ) 3030, 2926, 2855, 1603, 1506, 1455, 1318, 1202, 1144, 1031, 905, 866, 750;  $^1\text{H}$  NMR (400 MHz,  $\text{CDCl}_3$ , ppm)  $\delta$  7.42-7.35 (m, 4H), 7.32-7.28 (m, 1H), 7.14 (t,  $J = 8.0$  Hz, 2H), 6.72 (t,  $J = 8.0$  Hz, 1H), 6.56 (d,  $J = 8.0$  Hz, 2H), 4.75 (dd,  $J = 4.0$  Hz, 8.0 Hz, 1H), 4.18 (s, 1H), 2.73-2.55 (m, 2H);  $^{13}\text{C}\{^1\text{H}\}$  NMR (100 MHz,  $\text{CDCl}_3$ , ppm)  $\delta$  146.3, 141.8, 129.2, 129.1, 127.9, 126.2, 125.8 (q,  $J = 276.0$  Hz), 118.3, 113.7, 53.2 (q,  $J = 3.0$  Hz), 41.8 (q,  $J = 27.0$  Hz);  $^{19}\text{F}$  NMR (376 MHz,  $\text{CDCl}_3$ , ppm)  $\delta$  -63.32; MS (EI, 70 eV)  $m/z$  265, 224, 204, 182, 151, 133; HRMS (ESI)  $m/z$   $[\text{M} + \text{H}]^+$  calcd for  $\text{C}_{15}\text{H}_{15}\text{F}_3\text{N}$  266.1151, found 266.1157.

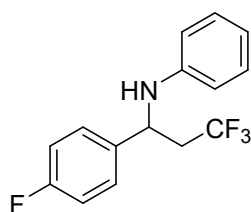

*N*-(3,3,3-Trifluoro-1-(4-fluorophenyl)propyl)aniline (**4b**). Eluent: petroleum ether/ethyl acetate (v/v = 30:1). Yellow liquid: 48% yield (13.6 mg, 0.05 mmol); IR (KBr,  $\text{cm}^{-1}$ ) 3058, 2926, 2855, 1603, 1509, 1432, 1316, 1260, 1201, 1145, 1028, 908, 826;  $^1\text{H}$  NMR (400 MHz,  $\text{CDCl}_3$ )  $\delta$   $^1\text{H}$  NMR (400 MHz,  $\text{CDCl}_3$ , ppm)  $\delta$  7.38-7.32 (m, 2H), 7.12 (t,  $J = 8.0$  Hz, 2H), 7.04 (t,  $J = 8.0$  Hz, 2H), 6.70 (t,  $J = 8.0$  Hz, 1H), 6.50 (d,

$J = 8.0$  Hz, 2H), 4.68 (dd,  $J = 4.0$  Hz, 8.0 Hz, 1H), 4.15 (s, 1H), 2.67-2.48 (m, 2H);  $^{13}\text{C}\{^1\text{H}\}$  NMR (100 MHz,  $\text{CDCl}_3$ , ppm)  $\delta$  162.3 (d,  $J = 245.0$  Hz), 146.1, 137.4 (d,  $J = 4.0$  Hz), 129.3, 127.8 (d,  $J = 8.0$  Hz), 125.6 (q,  $J = 276.0$  Hz), 118.5, 116.0 (d,  $J = 21.0$  Hz), 113.7, 52.6 (q,  $J = 2.0$  Hz), 41.9 (q,  $J = 26.0$  Hz);  $^{19}\text{F}$  NMR (376 MHz,  $\text{CDCl}_3$ , ppm)  $\delta$  -63.22, -114.37; MS (EI, 70 eV)  $m/z$  283, 200, 191, 151, 127, 104; HRMS (ESI)  $m/z$   $[\text{M} + \text{H}]^+$  calcd for  $\text{C}_{15}\text{H}_{14}\text{F}_4\text{N}$  284.1057, found 284.1064.

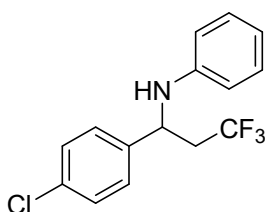

*N*-(1-(4-Chlorophenyl)-3,3,3-trifluoropropyl)aniline (**4c**). Eluent: petroleum ether/ethyl acetate (v/v = 30:1). Yellow liquid: 50% (15.0 mg, 0.05 mmol); IR (KBr,  $\text{cm}^{-1}$ ) 3032, 2956, 2925, 2854, 1673, 1603, 1493, 1379, 1137, 1017, 969, 868, 750;  $^1\text{H}$  NMR (400 MHz,  $\text{CDCl}_3$ , ppm)  $\delta$  7.35-7.34 (m, 4H), 7.12 (t,  $J = 8.0$  Hz, 2H), 6.73 (t,  $J = 8.0$  Hz, 1H), 6.52 (d,  $J = 8.0$  Hz, 2H), 4.70 (dd,  $J = 8.0$  Hz, 4.0 Hz, 1H), 2.66-2.51 (m, 2H);  $^{13}\text{C}\{^1\text{H}\}$  NMR (100 MHz,  $\text{CDCl}_3$ , ppm)  $\delta$  146.0, 140.2, 133.6, 129.3, 129.3, 127.6, 125.6 (q,  $J = 276.0$  Hz), 118.6, 113.7, 52.7 (q,  $J = 3.0$  Hz), 41.8 (q,  $J = 27.0$  Hz);  $^{19}\text{F}$  NMR (376 MHz,  $\text{CDCl}_3$ , ppm)  $\delta$  -63.20; MS (EI, 70 eV)  $m/z$  299, 248, 231, 216, 180, 151; HRMS (ESI)  $m/z$   $[\text{M} + \text{H}]^+$  calcd for  $\text{C}_{15}\text{H}_{14}\text{ClF}_3\text{N}$  300.0761, found 300.0765.

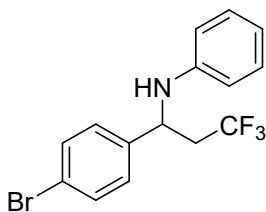

*N*-(1-(4-Bromophenyl)-3,3,3-trifluoropropyl)aniline (**4d**). Eluent: petroleum ether/ethyl acetate (v/v = 30:1). Yellow liquid: 70% (24.1 mg, 0.07 mmol); IR (KBr,  $\text{cm}^{-1}$ ) 3043, 2925, 2854, 1735, 1619, 1533, 1457, 1323, 1202, 1114, 1033, 972, 829, 700;  $^1\text{H}$  NMR (400 MHz,  $\text{CDCl}_3$ , ppm)  $\delta$  7.40-7.39 (m, 1H), 7.32-7.28 (m, 3H), 7.13 (t,  $J = 8.0$  Hz, 2H), 6.74 (t,  $J = 8.0$  Hz, 1H), 6.54 (d,  $J = 8.0$  Hz, 2H), 4.69 (dd,  $J = 8.0$  Hz, 4.0 Hz, 1H), 2.68-2.54 (m, 2H);  $^{13}\text{C}\{^1\text{H}\}$  NMR (100 MHz,  $\text{CDCl}_3$ , ppm)  $\delta$  146.0, 140.8, 132.2, 129.3, 127.9, 125.6 (q,  $J = 276.0$  Hz), 121.7, 118.6, 113.7, 52.7 (q,  $J = 3.0$  Hz), 41.8 (q,  $J = 27.0$  Hz);  $^{19}\text{F}$  NMR (376 MHz,  $\text{CDCl}_3$ , ppm)  $\delta$  -63.20; MS (EI, 70 eV)  $m/z$  343, 260, 251, 187, 151, 132; HRMS (ESI)  $m/z$   $[\text{M} + \text{H}]^+$  calcd for  $\text{C}_{15}\text{H}_{14}\text{BrF}_3\text{N}$  344.0256, found 344.0242.

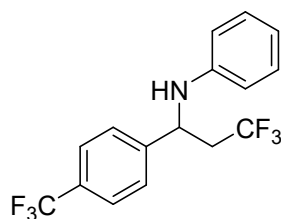

*N*-(3,3,3-Trifluoro-1-(4-(trifluoromethyl)phenyl)propyl)aniline (**4e**). Eluent: petroleum ether/ethyl acetate (v/v = 30:1). Yellow liquid: 51% (17.0 mg, 0.05 mmol); IR (KBr,  $\text{cm}^{-1}$ ) 3048, 2926, 2851, 1724, 1603, 1500, 1420, 1325, 1261, 1131, 1081, 913, 824, 750;  $^1\text{H}$  NMR (400 MHz,  $\text{CDCl}_3$ , ppm)  $\delta$  7.63 (d,  $J = 8.0$  Hz, 2H), 7.53 (d,  $J = 8.0$  Hz, 2H), 7.14 (t,  $J = 8.0$  Hz, 2H), 6.74 (t,  $J = 8.0$  Hz, 1H), 6.52 (d,  $J = 8$  Hz, 2H), 4.81 (dd,  $J = 8.0$  Hz, 4.0 Hz, 1H), 4.22 (s, 1H), 2.69-2.52 (m, 2H);  $^{13}\text{C}\{^1\text{H}\}$  NMR (100 MHz,  $\text{CDCl}_3$ , ppm)  $\delta$  145.8, 130.3 (d,  $J = 32.0$  Hz), 129.8, 129.3, 126.1 (q,  $J = 4.0$  Hz) ( $\text{CF}_3$ ), 125.6 (q,  $J = 276.0$  Hz) ( $\text{CF}_3$ ), 125.3, 122.6, 118.7, 113.7, 52.9 (q,  $J = 3.0$  Hz), 41.8 (q,  $J = 8.0$  Hz);  $^{19}\text{F}$  NMR (376 MHz,  $\text{CDCl}_3$ , ppm)  $\delta$  -62.49, -63.17; MS

(EI, 70 eV)  $m/z$  333, 314, 292, 250, 173, 145; HRMS (ESI)  $m/z$   $[M + H]^+$  calcd for  $C_{16}H_{14}F_6N$  334.1025, found 334.1014.

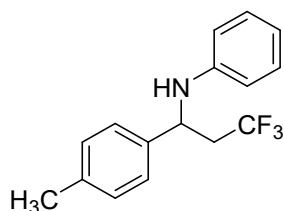

*N*-(3,3,3-Trifluoro-1-(*p*-tolyl)propyl)aniline (**4f**). Eluent: petroleum ether/ethyl acetate (v/v = 30:1). Yellow liquid: 56% (15.8 mg, 0.06 mmol); IR (KBr,  $cm^{-1}$ ) 3051, 2925, 2855, 1603, 1502, 1460, 1377, 1261, 1138, 1084, 969, 812, 749, 692;  $^1H$  NMR (400 MHz,  $CDCl_3$ , ppm)  $\delta$  7.28-7.27 (m, 2H), 7.17-7.10 (m, 4H), 6.70 (d,  $J = 8.0$  Hz, 1H), 6.55 (d,  $J = 8.0$  Hz, 2H), 4.70 (dd,  $J = 8.0$  Hz, 4.0 Hz, 1H), 4.15 (s, 1H), 2.65-2.54 (m, 2H), 2.33 (s, 3H);  $^{13}C\{^1H\}$  NMR (100 MHz,  $CDCl_3$ , ppm)  $\delta$  146.4, 138.7, 137.6, 129.7, 129.2, 126.1, 125.8 (d,  $J = 276.0$  Hz), 118.2, 113.6, 52.9 (q,  $J = 3.0$  Hz), 41.9 (q,  $J = 27.0$  Hz), 21.1;  $^{19}F$  NMR (376 MHz,  $CDCl_3$ , ppm)  $\delta$  -63.27; MS (EI, 70 eV)  $m/z$  279, 196, 187, 151, 123, 104; HRMS (ESI)  $m/z$   $[M + H]^+$  calcd for  $C_{16}H_{17}F_3N$  280.1308, found 280.1319.

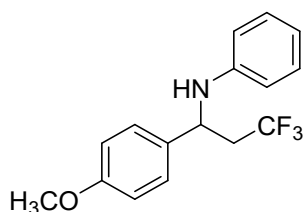

*N*-(3,3,3-Trifluoro-1-(4-methoxyphenyl)propyl)aniline (**4g**). Eluent: petroleum ether/ethyl acetate (v/v = 30:1). Yellow liquid: 58% (17.2 mg, 0.06 mmol); IR (KBr,  $cm^{-1}$ ) 3035, 2925, 2869, 1603, 1511, 1461, 1378, 1247, 1134, 1033, 908, 826, 751;  $^1H$  NMR (400 MHz,  $CDCl_3$ , ppm)  $\delta$  7.29 (d,  $J = 8.0$  Hz, 2H), 7.12 (t,  $J = 8.0$  Hz, 2H),

6.88 (d,  $J = 8.0$  Hz, 2H), 6.71 (t,  $J = 8.0$  Hz, 1H), 6.55 (d,  $J = 8.0$  Hz, 2H), 4.69 (dd,  $J = 8.0$  Hz, 4.0 Hz, 1H), 4.13 (s, 1H), 3.79 (s, 3H), 2.70-2.49 (m, 2H);  $^{13}\text{C}\{^1\text{H}\}$  NMR (100 MHz,  $\text{CDCl}_3$ , ppm)  $\delta$  159.2, 146.4, 133.7, 129.2, 127.3, 125.8 (q,  $J = 276.0$  Hz), 118.2, 114.4, 113.7, 55.3, 52.6 (q,  $J = 3.0$  Hz), 41.8 (q,  $J = 27.0$  Hz);  $^{19}\text{F}$  NMR (376 MHz,  $\text{CDCl}_3$ , ppm)  $\delta$  -63.24; MS (EI, 70 eV)  $m/z$  295, 212, 203, 168, 139, 104, 93; HRMS (ESI)  $m/z$   $[\text{M} + \text{H}]^+$  calcd for  $\text{C}_{16}\text{H}_{17}\text{F}_3\text{NO}$  296.1257, found 296.1249.

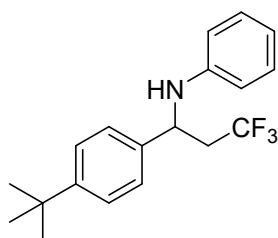

*N*-(1-(4-(*Tert*-butyl)phenyl)-3,3,3-trifluoropropyl)aniline (**4h**). Eluent: petroleum ether/ethyl acetate (v/v = 30:1). Yellow liquid: 53% (17.0 mg, 0.05 mmol); IR (KBr,  $\text{cm}^{-1}$ ) 3058, 2962, 2863, 1603, 1505, 1431, 1319, 1210, 1137, 1625, 902, 876, 750;  $^1\text{H}$  NMR (400 MHz,  $\text{CDCl}_3$ , ppm)  $\delta$  7.37 (d,  $J = 8.0$  Hz, 2H), 7.31 (d,  $J = 8.0$  Hz, 2H), 7.14 (t,  $J = 8.0$  Hz, 2H), 6.71 (t,  $J = 8.0$  Hz, 1H), 6.57 (d,  $J = 8.0$  Hz, 2H), 4.72 (dd,  $J = 8.0$  Hz, 4.0 Hz, 1H), 4.14 (s, 1H), 2.68-2.54 (m, 2H), 1.31 (s, 9H);  $^{13}\text{C}\{^1\text{H}\}$  NMR (100 MHz,  $\text{CDCl}_3$ , ppm)  $\delta$  150.8, 146.4, 138.7, 129.2, 125.9, 125.8, 125.8 (q,  $J = 276.0$  Hz), 118.1, 113.6, 52.7 (q,  $J = 3.0$  Hz), 41.7 (q,  $J = 27.0$  Hz), 34.5, 31.3;  $^{19}\text{F}$  NMR (376 MHz,  $\text{CDCl}_3$ , ppm)  $\delta$  -63.33; MS (EI, 70 eV)  $m/z$  321, 238, 229, 214, 173, 104; HRMS (ESI)  $m/z$   $[\text{M} + \text{H}]^+$  calcd for  $\text{C}_{19}\text{H}_{23}\text{F}_3\text{N}$  322.1777, found 322.1748.

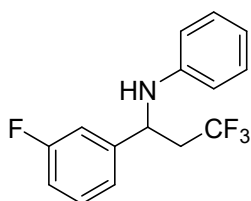

*N*-(3,3,3-Trifluoro-1-(3-fluorophenyl)propyl)aniline (**4i**). Eluent: petroleum ether/ethyl acetate (v/v = 30:1). Yellow liquid: 48% (13.6 mg, 0.05 mmol); IR (KBr,  $\text{cm}^{-1}$ ) 3039, 2923, 2854, 1601, 1513, 1450, 1315, 1247, 1135, 1079, 970, 880, 750;  $^1\text{H}$  NMR (400 MHz,  $\text{CDCl}_3$ , ppm)  $\delta$  7.35-7.32 (m, 1H), 7.18 (d,  $J = 8.0$  Hz, 1H), 7.12 (t,  $J = 8.0$  Hz, 3H), 6.98 (t,  $J = 8.0$  Hz, 1H), 6.73 (t,  $J = 8.0$  Hz, 1H), 6.53 (d,  $J = 8.0$  Hz, 2H), 4.72 (dd,  $J = 8.0$  Hz, 4.0 Hz, 1H), 4.21 (s, 1H), 2.67-2.50 (m, 2H);  $^{13}\text{C}\{^1\text{H}\}$  NMR (100 MHz,  $\text{CDCl}_3$ , ppm)  $\delta$  163.3 (d,  $J = 246.0$  Hz), 146.0, 144.6 (d,  $J = 7.0$  Hz), 130.7 (d,  $J = 8.0$  Hz), 129.3, 125.5 (q,  $J = 289.0$  Hz) ( $\text{CF}_3$ ), 121.8 (d,  $J = 3.0$  Hz), 118.5, 114.9 (d,  $J = 21.0$  Hz), 113.7, 113.2 (d,  $J = 22.0$  Hz), 52.9 (q,  $J = 3.0$  Hz), 41.7;  $^{19}\text{F}$  NMR (376 MHz,  $\text{CDCl}_3$ , ppm)  $\delta$  -63.26, -111.86; MS (EI, 70 eV)  $m/z$  283, 262, 242, 200, 127, 104; HRMS (ESI)  $m/z$   $[\text{M} + \text{H}]^+$  calcd for  $\text{C}_{15}\text{H}_{14}\text{F}_4\text{N}$  284.1057, found 284.1061.

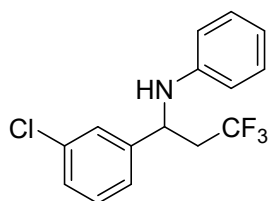

*N*-(1-(3-Chlorophenyl)-3,3,3-trifluoropropyl)aniline (**4j**). Eluent: petroleum ether/ethyl acetate (v/v = 30:1). Yellow liquid: 52% (15.6 mg, 0.05 mmol); IR (KBr,  $\text{cm}^{-1}$ ) 2925, 2855, 1602, 1499, 1379, 1260, 1139, 1081, 972, 854, 753;  $^1\text{H}$  NMR (400 MHz,  $\text{CDCl}_3$ , ppm)  $\delta$  7.40-7.39 (m, 1H), 7.34-7.28 (m, 3H), 7.13 (t,  $J = 8.0$  Hz, 2H), 6.74 (t,  $J = 8.0$  Hz, 1H), 6.54 (d,  $J = 8.0$  Hz, 2H), 4.70 (dd,  $J = 8.0, 4.0$  Hz, 1H), 2.68-2.54 (m, 2H);  $^{13}\text{C}\{^1\text{H}\}$  NMR (100 MHz,  $\text{CDCl}_3$ , ppm)  $\delta$  146.0, 144.0, 135.0, 130.4, 129.3, 128.2, 126.3, 125.6 (q,  $J = 277.0$  Hz), 124.4, 118.6, 113.7, 52.9 (q,  $J = 3.0$  Hz), 41.8 (q,  $J = 27.0$  Hz);  $^{19}\text{F}$  NMR (376 MHz,  $\text{CDCl}_3$ , ppm)  $\delta$  -63.26; MS (EI, 70 eV)



$m/z$  299, 216, 188, 151, 143, 104; HRMS (ESI)  $m/z$   $[M + H]^+$  calcd for  $C_{15}H_{14}ClF_3N$  300.0761, found 300.0771.

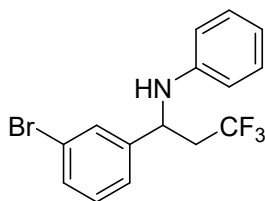

*N*-(1-(3-Bromophenyl)-3,3,3-trifluoropropyl)aniline (**4k**). Eluent: petroleum ether/ethyl acetate (v/v = 30:1). Yellow liquid: 68% (23.3 mg, 0.07 mmol); IR (KBr,  $cm^{-1}$ ) 3057, 2923, 2856, 1703, 1638, 1509, 1423, 1375, 1084, 995, 868, 747, 697;  $^1H$  NMR (400 MHz,  $CDCl_3$ , ppm)  $\delta$  7.47 (s, 1H), 7.33 (d,  $J = 8.0$  Hz, 1H), 7.24 (d,  $J = 8.0$  Hz, 1H), 7.14 (t,  $J = 8.0$  Hz, 1H), 7.05 (t,  $J = 8.0$  Hz, 2H), 6.65 (t,  $J = 8.0$  Hz, 1H), 6.44 (d,  $J = 8.0$  Hz, 2H), 4.60 (dd,  $J = 8.0$  Hz, 4.0 Hz, 1H), 4.08 (s, 1H), 2.59-2.40 (m, 2H);  $^{13}C\{^1H\}$  NMR (100 MHz,  $CDCl_3$ , ppm)  $\delta$  146.0, 144.3, 131.1, 130.1, 129.3, 129.3, 125.6 (q,  $J = 276.0$  Hz), 124.9, 123.2, 118.6, 113.7, 52.9 (q,  $J = 3.0$  Hz), 41.9 (q,  $J = 27.0$  Hz);  $^{19}F$  NMR (376 MHz,  $CDCl_3$ , ppm)  $\delta$  -63.28; MS (EI, 70 eV)  $m/z$  343, 260, 189, 151, 104, 77; HRMS (ESI)  $m/z$   $[M + H]^+$  calcd for  $C_{15}H_{14}BrF_3N$  344.0256, found 344.0242.

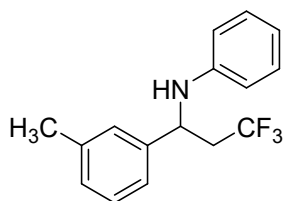

*N*-(3,3,3-Trifluoro-1-(*m*-tolyl)propyl)aniline (**4l**). Eluent: petroleum ether/ethyl acetate (v/v = 30:1). Yellow liquid: 58% (16.2 mg, 0.06 mmol); IR (KBr,  $cm^{-1}$ ) 3035, 2924, 2855, 1603, 1503, 1460, 1316, 1261, 1136, 1039, 910, 846, 749, 697;  $^1H$  NMR (400 MHz,  $CDCl_3$ , ppm)  $\delta$  7.24 (d,  $J = 8.0$  Hz, 1H), 7.18 (d,  $J = 8.0$  Hz, 2H), 7.15-

7.09 (m, 3H), 6.71 (t,  $J = 8.0$  Hz, 1H), 6.56 (d,  $J = 8.0$  Hz, 2H), 4.69 (q,  $J = 8.0$  Hz, 4.0 Hz, 1H), 4.17 (s, 1H), 2.66-2.55 (m, 2H), 2.35 (s, 3H);  $^{13}\text{C}\{^1\text{H}\}$  NMR (100 MHz,  $\text{CDCl}_3$ , ppm)  $\delta$  146.4, 141.8, 138.8, 129.2, 128.9, 128.7, 126.8, 125.8 (d,  $J = 276.0$  Hz), 123.2, 118.2, 113.6, 53.2 (q,  $J = 3.0$  Hz), 41.7 (t,  $J = 27.0$  Hz), 21.5;  $^{19}\text{F}$  NMR (376 MHz,  $\text{CDCl}_3$ , ppm)  $\delta$  -63.33; MS (EI, 70 eV)  $m/z$  279, 196, 187, 151, 123, 104; HRMS (ESI)  $m/z$   $[\text{M} + \text{H}]^+$  calcd for  $\text{C}_{16}\text{H}_{17}\text{F}_3\text{N}$  280.1308, found 280.1308.

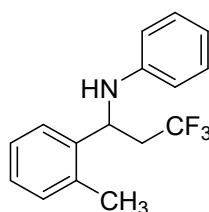

*N*-(3,3,3-Trifluoro-1-(*o*-tolyl)propyl)aniline (**4m**). Eluent: petroleum ether/ethyl acetate (v/v = 30:1). Yellow liquid: 57% (16.0 mg, 0.06 mmol); IR (KBr,  $\text{cm}^{-1}$ ) 3035, 2926, 2855, 1603, 1504, 1432, 1318, 1213, 1135, 1096, 902, 868, 726, 692;  $^1\text{H}$  NMR (400 MHz,  $\text{CDCl}_3$ , ppm)  $\delta$  7.45-7.43 (m, 1H), 7.21-7.16 (m, 3H), 7.12 (t,  $J = 8.0$  Hz, 2H), 6.70 (t,  $J = 8.0$  Hz, 1H), 6.48 (d,  $J = 8.0$  Hz, 2H), 4.94 (dd,  $J = 8.0$  Hz, 4.0 Hz, 1H), 4.14 (s, 1H), 2.62-2.47 (m, 2H), 2.45 (s, 3H);  $^{13}\text{C}\{^1\text{H}\}$  NMR (100 MHz,  $\text{CDCl}_3$ , ppm)  $\delta$  146.4, 139.5, 134.6, 131.1, 129.3, 127.7, 126.9, 125.9 (d,  $J = 276.0$  Hz), 125.1, 118.1, 113.4, 49.2 (q,  $J = 3.0$  Hz), 40.4 (q,  $J = 27.0$  Hz), 18.9;  $^{19}\text{F}$  NMR (376 MHz,  $\text{CDCl}_3$ , ppm)  $\delta$  -63.65; MS (EI, 70 eV)  $m/z$  279, 196, 187, 165, 123, 104; HRMS (ESI)  $m/z$   $[\text{M} + \text{H}]^+$  calcd for  $\text{C}_{16}\text{H}_{17}\text{F}_3\text{N}$  280.1308, found 280.1312.

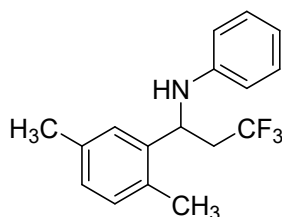

*N*-(1-(2,5-Dimethylphenyl)-3,3,3-trifluoropropyl)aniline (**4n**). Eluent: petroleum ether/ethyl acetate (v/v = 30:1). Yellow liquid: 44% (13.0 mg, 0.04 mmol); IR (KBr,  $\text{cm}^{-1}$ ) 3030, 2925, 2869, 1603, 1502, 1460, 1313, 1260, 1136, 1031, 907, 806, 748, 692;  $^1\text{H}$  NMR (400 MHz,  $\text{CDCl}_3$ , ppm)  $\delta$  7.24 (s, 1H), 7.14-7.07 (m, 3H), 6.99 (d,  $J$  = 8.0 Hz, 1H), 6.70 (t,  $J$  = 8.0 Hz, 1H), 6.49 (d,  $J$  = 8.0 Hz, 2H), 4.89 (dd,  $J$  = 8.0 Hz, 4.0 Hz, 1H), 4.10 (s, 1H), 2.60-2.45 (m, 2H), 2.39 (s, 3H), 2.27 (s, 3H);  $^{13}\text{C}\{^1\text{H}\}$  NMR (100 MHz,  $\text{CDCl}_3$ , ppm)  $\delta$  146.6, 139.4, 136.4, 131.3, 131.0, 129.3, 128.4, 125.7, 118.1, 113.3, 112.9, 49.3 (q,  $J$  = 3.0 Hz), 40.4 (q,  $J$  = 26.0 Hz), 21.2, 18.5;  $^{19}\text{F}$  NMR (376 MHz,  $\text{CDCl}_3$ , ppm)  $\delta$  -63.75; MS (EI, 70 eV)  $m/z$  293, 264, 237, 210, 185, 165; HRMS (ESI)  $m/z$   $[\text{M} + \text{H}]^+$  calcd for  $\text{C}_{17}\text{H}_{19}\text{F}_3\text{N}$  294.1464, found 294.1454.

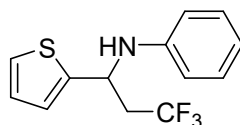

*N*-(3,3,3-Trifluoro-1-(thiophen-2-yl)propyl)aniline (**4o**). Eluent: petroleum ether/ethyl acetate (v/v = 30:1). Yellow liquid: 56% (15.2 mg, 0.06 mmol); IR (KBr,  $\text{cm}^{-1}$ ) 3038, 2923, 2852, 1735, 1603, 1504, 1432, 1310, 1258, 1133, 1033, 905, 857, 751;  $^1\text{H}$  NMR (400 MHz,  $\text{CDCl}_3$ , ppm)  $\delta$  7.23-7.22 (m, 1H), 7.17 (t,  $J$  = 8.0 Hz, 2H), 7.04 (s, 1H), 6.97 (t,  $J$  = 8.0 Hz, 1H), 6.76 (t,  $J$  = 8.0 Hz, 1H), 6.63 (d,  $J$  = 8.0 Hz, 2H), 5.06 (dd,  $J$  = 8.0 Hz, 4.0 Hz, 1H), 4.10 (s, 1H), 2.81-2.64 (m, 2H);  $^{13}\text{C}\{^1\text{H}\}$  NMR (100 MHz,  $\text{CDCl}_3$ , ppm)  $\delta$  146.4, 145.9, 129.3, 127.1, 125.5 (q,  $J$  = 276.0 Hz) ( $\text{CF}_3$ ), 124.7, 124.2, 118.8, 113.8, 49.2 (q,  $J$  = 3.0 Hz), 42.0 (q,  $J$  = 27.0 Hz);  $^{19}\text{F}$  NMR (376 MHz,  $\text{CDCl}_3$ , ppm)  $\delta$  -63.35; MS (EI, 70 eV)  $m/z$  271, 188, 179, 159, 115, 93; HRMS (ESI)  $m/z$   $[\text{M} + \text{H}]^+$  calcd for  $\text{C}_{13}\text{H}_{13}\text{F}_3\text{NS}$  272.0715, found 272.0726.

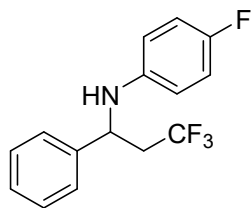

*4-Fluoro-N-(3,3,3-trifluoro-1-phenylpropyl)aniline* (**5a**). Eluent: petroleum ether/ethyl acetate (v/v = 30:1). Yellow liquid: 71% (20.1 mg, 0.07 mmol); IR (KBr,  $\text{cm}^{-1}$ ) 3040, 2925, 1614, 1511, 1434, 1380, 1259, 1143, 1031, 904, 821, 701;  $^1\text{H}$  NMR (400 MHz,  $\text{CDCl}_3$ , ppm)  $\delta$  7.37-7.28 (m, 5H), 6.81 (t,  $J = 8.0$  Hz, 2H), 6.48-6.44 (m, 2H), 4.65 (dd,  $J = 8.0$  Hz, 4.0 Hz, 1H), 2.66-2.51 (m, 2H);  $^{13}\text{C}\{^1\text{H}\}$  NMR (100 MHz,  $\text{CDCl}_3$ , ppm)  $\delta$  156.2 (d,  $J = 235.0$  Hz), 142.6 (d,  $J = 2.0$  Hz), 142.6, 129.1, 128.0, 126.2, 125.8 (q,  $J = 276.0$  Hz), 115.7 (d,  $J = 22.0$  Hz), 114.6 (d,  $J = 8.0$  Hz), 53.8 (d,  $J = 3.0$  Hz), 42.4 (q,  $J = 27.0$  Hz);  $^{19}\text{F}$  NMR (376 MHz,  $\text{CDCl}_3$ , ppm)  $\delta$  -63.32, -126.92; MS (EI, 70 eV)  $m/z$  283, 200, 173, 133, 122, 109; HRMS (ESI)  $m/z$   $[\text{M} + \text{H}]^+$  calcd for  $\text{C}_{15}\text{H}_{14}\text{F}_4\text{N}$  284.1057, found 284.1051.

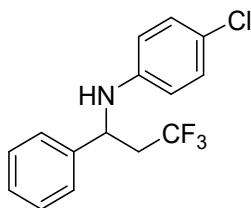

*4-Chloro-N-(3,3,3-trifluoro-1-phenylpropyl)aniline* (**5b**). Eluent: petroleum ether/ethyl acetate (v/v = 30:1). Yellow liquid: 40% (12.0 mg, 0.04 mmol); IR (KBr,  $\text{cm}^{-1}$ ) 3033, 2924, 2862, 1601, 1501, 1454, 1381, 1258, 1139, 1031, 905, 816, 701;  $^1\text{H}$  NMR (400 MHz,  $\text{CDCl}_3$ , ppm)  $\delta$  7.39-7.35 (m, 4H), 7.33-7.27 (m, 1H), 7.06 (d,  $J = 8.0$  Hz, 2H), 6.46 (d,  $J = 8.0$  Hz, 2H), 4.68 (t,  $J = 8.0$  Hz, 1H), 4.21 (s, 1H), 2.66-2.56 (m, 2H);  $^{13}\text{C}\{^1\text{H}\}$  NMR (100 MHz,  $\text{CDCl}_3$ , ppm)  $\delta$  144.8, 144.2, 129.1, 129.1, 128.1,

126.1, 125.7 (q,  $J = 276.0$  Hz), 123.0, 114.8, 53.3 (q,  $J = 3.0$  Hz), 41.8 (q,  $J = 27.0$  Hz);  $^{19}\text{F}$  NMR (376 MHz,  $\text{CDCl}_3$ , ppm)  $\delta$  -63.37; MS (EI, 70 eV)  $m/z$  299, 216, 188, 151, 143, 104; HRMS (ESI)  $m/z$   $[\text{M} + \text{H}]^+$  calcd for  $\text{C}_{15}\text{H}_{14}\text{ClF}_3\text{N}$  300.0761, found 300.0769.

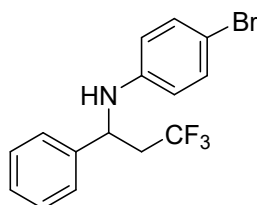

*4-Bromo-N-(3,3,3-trifluoro-1-phenylpropyl)aniline* (**5c**). Eluent: petroleum ether/ethyl acetate (v/v = 30:1). Yellow liquid: 75% (26.0 mg, 0.08 mmol); IR (KBr,  $\text{cm}^{-1}$ ) 3033, 2924, 1595, 1497, 1380, 1258, 1146, 1075, 910, 814, 701, 608, 504;  $^1\text{H}$  NMR (400 MHz,  $\text{CDCl}_3$ , ppm)  $\delta$  7.40-7.34 (m, 4H), 7.33-7.27 (m, 1H), 7.19 (d,  $J = 8.0$  Hz, 2H), 6.42 (d,  $J = 8.0$  Hz, 2H), 4.68 (t,  $J = 8.0$  Hz, 1H), 4.21 (s, 1H), 2.69-2.53 (m, 2H);  $^{13}\text{C}\{^1\text{H}\}$  NMR (100 MHz,  $\text{CDCl}_3$ , ppm)  $\delta$  145.2, 141.2, 132.0, 129.1, 128.1, 126.1, 125.7 (q,  $J = 276.0$  Hz), 115.3, 110.1, 53.2 (q,  $J = 3.0$  Hz), 41.8 (q,  $J = 27.0$  Hz);  $^{19}\text{F}$  NMR (376 MHz,  $\text{CDCl}_3$ , ppm)  $\delta$  -63.37; MS (EI, 70 eV)  $m/z$  343, 260, 189, 151, 104, 77; HRMS (ESI)  $m/z$   $[\text{M} + \text{H}]^+$  calcd for  $\text{C}_{15}\text{H}_{14}\text{BrF}_3\text{N}$  344.0256, found 344.0268.

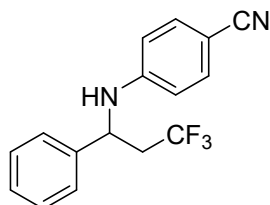

*4-((3,3,3-Trifluoro-1-phenylpropyl)amino)benzonitrile* (**5d**). Eluent: petroleum ether/ethyl acetate (v/v = 30:1). Yellow liquid: 78% (23.0 mg, 0.08 mmol); IR (KBr,

cm<sup>-1</sup>) 3030, 2926, 2853, 2215, 1606, 1525, 1454, 1337, 1033, 910, 825, 701; <sup>1</sup>H NMR (400 MHz, CDCl<sub>3</sub>, ppm) δ 7.45-7.29 (m, 7H), 6.53 (d, *J* = 8.0 Hz, 2H), 4.80-4.75 (m, 2H), 2.69-2.59 (m, 2H); <sup>13</sup>C{<sup>1</sup>H} NMR (100 MHz, CDCl<sub>3</sub>, ppm) δ 149.5, 140.3, 133.7, 129.3, 128.4, 125.9, 125.5 (q, *J* = 276.0 Hz), 120.0, 113.3, 100.2, 52.6 (q, *J* = 3.0 Hz), 41.7 (q, *J* = 27.0 Hz); <sup>19</sup>F NMR (376 MHz, CDCl<sub>3</sub>, ppm) δ -63.36; MS (EI, 70 eV) *m/z* 290, 207, 173, 109, 77; HRMS (ESI) *m/z* [M + H]<sup>+</sup> calcd for C<sub>16</sub>H<sub>14</sub>F<sub>3</sub>N<sub>2</sub> 291.1104, found 291.1106.

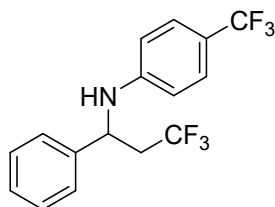

*N*-(3,3,3-Trifluoro-1-phenylpropyl)-4-(trifluoromethyl)aniline (**5e**). Eluent: petroleum ether/ethyl acetate (v/v = 30:1). Yellow liquid: 64% (21.3 mg, 0.06 mmol); IR (KBr, cm<sup>-1</sup>) 3400, 3030, 2926, 2853, 1738, 1619, 1532, 1491, 1324, 1203, 1113, 1068, 938, 826, 701; <sup>1</sup>H NMR (400 MHz, CDCl<sub>3</sub>, ppm) δ 7.40-7.29 (m, 7H), 6.56 (d, *J* = 8.0 Hz, 2H), 4.77 (t, *J* = 8.0 Hz, 1H), 4.50 (s, 1H), 2.68-2.59 (m, 2H); <sup>13</sup>C{<sup>1</sup>H} NMR (100 MHz, CDCl<sub>3</sub>, ppm) δ 148.7, 140.8, 129.2, 128.2, 126.6 (q, *J* = 4.0 Hz), 126.5 (q, *J* = 86.0 Hz), 126.0, 123.8 (d, *J* = 78.0 Hz), 119.9 (d, *J* = 33.0 Hz), 112.9, 52.9 (q, *J* = 3.0 Hz), 41.8 (q, *J* = 27.0 Hz); <sup>19</sup>F NMR (376 MHz, CDCl<sub>3</sub>, ppm) δ -61.20, -63.35; MS (EI, 70 eV) *m/z* 333, 314, 292, 250, 173, 109; HRMS (ESI) *m/z* [M + H]<sup>+</sup> calcd for C<sub>16</sub>H<sub>14</sub>F<sub>6</sub>N 334.1025, found 334.1013.

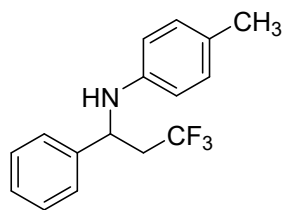

*4-Methyl-N-(3,3,3-trifluoro-1-phenylpropyl)aniline* (**5f**). Eluent: petroleum ether/ethyl acetate (v/v = 30:1). Yellow liquid: 43% (12.2 mg, 0.04 mmol); IR (KBr,  $\text{cm}^{-1}$ ) 3401, 3033, 2926, 1619, 1520, 1457, 1381, 1259, 1138, 1034, 910, 809, 701;  $^1\text{H}$  NMR (400 MHz,  $\text{CDCl}_3$ , ppm)  $\delta$  7.39-7.32 (m, 4H), 7.29-7.27 (m, 1H), 6.92 (d,  $J = 8.0$  Hz, 2H), 6.46 (d,  $J = 8.0$  Hz, 2H), 4.68 (q,  $J = 8.0$  Hz, 4.0 Hz, 1H), 2.67-2.52 (m, 2H), 2.19 (s, 3H);  $^{13}\text{C}\{^1\text{H}\}$  NMR (100 MHz,  $\text{CDCl}_3$ , ppm)  $\delta$  144.0, 141.9, 129.7, 129.0, 127.9, 127.5, 126.2, 125.8 (q,  $J = 276.0$  Hz), 113.9, 53.5 (q,  $J = 3.0$  Hz), 41.8 (q,  $J = 27.0$  Hz), 20.4;  $^{19}\text{F}$  NMR (376 MHz,  $\text{CDCl}_3$ , ppm)  $\delta$  -63.32; MS (EI, 70 eV)  $m/z$  279, 262, 196, 152, 133, 109; HRMS (ESI)  $m/z$   $[\text{M} + \text{H}]^+$  calcd for  $\text{C}_{16}\text{H}_{17}\text{F}_3\text{N}$  280.1308, found 280.1314.

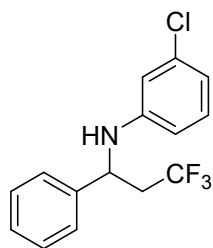

*3-Chloro-N-(3,3,3-trifluoro-1-phenylpropyl)aniline* (**5g**). Eluent: petroleum ether/ethyl acetate (v/v = 30:1). Yellow liquid: 56% (17.0 mg, 0.06 mmol); IR (KBr,  $\text{cm}^{-1}$ ) 3400, 3038, 2926, 2853, 1598, 1484, 1380, 1258, 1146, 1031, 930, 851, 763;  $^1\text{H}$  NMR (400 MHz,  $\text{CDCl}_3$ , ppm)  $\delta$  7.39-7.34 (m, 4H), 7.32-7.28 (m, 1H), 7.01 (t,  $J = 8.0$  Hz, 1H), 6.66 (d,  $J = 8.0$  Hz, 1H), 6.53 (t,  $J = 8.0$  Hz, 1H), 6.40 (d,  $J = 8.0$  Hz, 1H), 4.70 (t,  $J = 8.0$  Hz, 1H), 4.24 (s, 1H), 2.65-2.55 (m, 2H);  $^{13}\text{C}\{^1\text{H}\}$  NMR (100

MHz, CDCl<sub>3</sub>, ppm)  $\delta$  147.4, 141.1, 135.0, 130.2, 129.2, 128.1, 126.1, 125.6 (q,  $J$  = 276.0 Hz), 118.2, 113.5, 111.8, 53.1 (q,  $J$  = 3.0 Hz), 41.8 (q,  $J$  = 27.0 Hz); <sup>19</sup>F NMR (376 MHz, CDCl<sub>3</sub>, ppm)  $\delta$  -63.30; MS (EI, 70 eV)  $m/z$  299, 216, 188, 151, 143, 104; HRMS (ESI)  $m/z$  [M + H]<sup>+</sup> calcd for C<sub>15</sub>H<sub>14</sub>ClF<sub>3</sub>N 300.0761, found 300.0774.

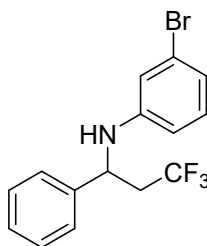

*3-Bromo-N-(3,3,3-trifluoro-1-phenylpropyl)aniline* (**5h**). Eluent: petroleum ether/ethyl acetate (v/v = 30:1). Yellow liquid: 66% (22.8 mg, 0.07 mmol); IR (KBr, cm<sup>-1</sup>) 3395, 3034, 2925, 2854, 1595, 1480, 1379, 1257, 1146, 1031, 986, 849, 762, 683; <sup>1</sup>H NMR (400 MHz, CDCl<sub>3</sub>, ppm)  $\delta$  7.39-7.33 (m, 4H), 7.32-7.28 (m, 1H), 6.96 (t,  $J$  = 8.0 Hz, 1H), 6.82 (d,  $J$  = 8.0 Hz, 1H), 6.77 (s, 1H), 6.44 (d,  $J$  = 8.0 Hz, 1H), 4.70 (t,  $J$  = 8.0 Hz, 1H), 4.24 (s, 1H), 2.65-2.56 (m, 2H); <sup>13</sup>C {<sup>1</sup>H} NMR (100 MHz, CDCl<sub>3</sub>, ppm)  $\delta$  147.5, 141.0, 130.5, 129.2, 128.1, 126.1, 125.6 (q,  $J$  = 276.0 Hz), 123.1, 121.1, 116.5, 112.1, 52.5 (q,  $J$  = 3.0 Hz), 41.8 (q,  $J$  = 27.0 Hz); <sup>19</sup>F NMR (376 MHz, CDCl<sub>3</sub>, ppm)  $\delta$  -63.30; MS (EI, 70 eV)  $m/z$  343, 260, 231, 173, 133, 109; HRMS (ESI)  $m/z$  [M + H]<sup>+</sup> calcd for C<sub>15</sub>H<sub>14</sub>BrF<sub>3</sub>N 344.0265, found 344.0254.

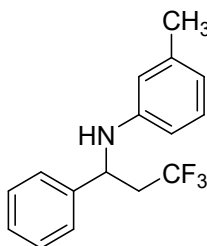

*3-Methyl-N-(3,3,3-trifluoro-1-phenylpropyl)aniline* (**5i**). Eluent: petroleum



ether/ethyl acetate (v/v = 30:1). Yellow liquid: 55% (15.4 mg, 0.06 mmol); IR (KBr,  $\text{cm}^{-1}$ ) 3430, 3039, 2925, 2855, 1606, 1518, 1454, 1320, 1204, 1137, 1034, 950, 852, 700;  $^1\text{H}$  NMR (400 MHz,  $\text{CDCl}_3$ , ppm)  $\delta$  7.40-7.34 (m, 4H), 7.30-7.28 (m, 1H), 7.00 (t,  $J = 8.0$  Hz, 1H), 6.54 (d,  $J = 8.0$  Hz, 1H), 6.40 (s, 1H), 6.33 (d,  $J = 8.0$  Hz, 1H), 4.73 (dd,  $J = 8.0$  Hz, 4.0 Hz, 1H), 4.14 (s, 1H), 2.67-2.56 (m, 2H). 2.23 (s, 3H);  $^{13}\text{C}\{^1\text{H}\}$  NMR (100 MHz,  $\text{CDCl}_3$ , ppm)  $\delta$  146.3, 141.9, 139.0, 129.1, 129.0, 127.8, 126.2, 125.8 (q,  $J = 276.0$  Hz), 119.2, 114.6, 110.6, 53.1 (q,  $J = 3.0$  Hz), 41.8 (q,  $J = 27.0$  Hz), 21.6;  $^{19}\text{F}$  NMR (376 MHz,  $\text{CDCl}_3$ , ppm)  $\delta$  -63.26; MS (EI, 70 eV)  $m/z$  279, 196, 173, 133, 109, 77; HRMS (ESI)  $m/z$   $[\text{M} + \text{H}]^+$  calcd for  $\text{C}_{16}\text{H}_{17}\text{F}_3\text{N}$  280.1308, found 280.1329.

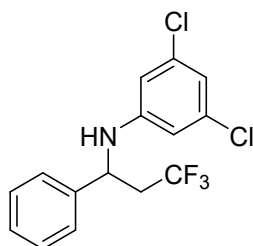

*3,5-Dichloro-N-(3,3,3-trifluoro-1-phenylpropyl)aniline (5j)*. Eluent: petroleum ether/ethyl acetate (v/v = 30:1). Yellow liquid: 45% (15.1 mg, 0.05 mmol); IR (KBr,  $\text{cm}^{-1}$ ) 3395, 3051, 2926, 2853, 1593, 1452, 1315, 1252, 1147, 1095, 964, 826, 701;  $^1\text{H}$  NMR (400 MHz,  $\text{CDCl}_3$ , ppm)  $\delta$  7.42-7.30 (m, 5H), 6.68-6.66 (m, 1H), 6.41-6.40 (m, 2H), 4.69 (dd,  $J = 8.0$  Hz, 4.0 Hz, 1H), 4.34 (s, 1H), 2.65-2.54 (m, 2H);  $^{13}\text{C}\{^1\text{H}\}$  NMR (100 MHz,  $\text{CDCl}_3$ , ppm)  $\delta$  147.9, 140.4, 135.5, 129.3, 128.3, 125.9, 125.5 (q,  $J = 277.0$  Hz), 118.1, 111.8, 52.9 (q,  $J = 3.0$  Hz), 41.8 (q,  $J = 27.0$  Hz);  $^{19}\text{F}$  NMR (376 MHz,  $\text{CDCl}_3$ , ppm)  $\delta$  -63.32; MS (EI, 70 eV)  $m/z$  333, 292, 250, 173, 133, 109; HRMS (ESI)  $m/z$   $[\text{M} + \text{H}]^+$  calcd for  $\text{C}_{15}\text{H}_{13}\text{Cl}_2\text{F}_3\text{N}$  334.0372, found 334.0368.

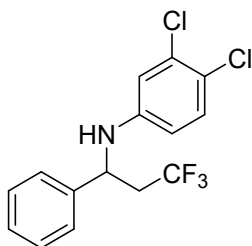

*3,4-Dichloro-N-(3,3,3-trifluoro-1-phenylpropyl)aniline (5k)*. Eluent: petroleum ether/ethyl acetate (v/v = 30:1). Yellow liquid: 48% (15.9 mg, 0.05 mmol); IR (KBr,  $\text{cm}^{-1}$ ) 3403, 3033, 2926, 2855, 1598, 1477, 1380, 1256, 1132, 1023, 930, 846, 700;  $^1\text{H}$  NMR (400 MHz,  $\text{CDCl}_3$ , ppm)  $\delta$  7.40-7.29 (m, 5H), 7.13 (d,  $J = 8.0$  Hz, 1H), 6.62 (s, 1H), 6.37 (d,  $J = 8.0$  Hz, 1H), 4.68-4.67 (m, 1H), 4.28 (s, 1H), 2.65-2.55 (m, 2H);  $^{13}\text{C}\{^1\text{H}\}$  NMR (100 MHz,  $\text{CDCl}_3$ , ppm)  $\delta$  145.7, 140.7, 132.8, 130.6, 129.3, 128.3, 126.0, 125.6 (q,  $J = 276.0$  Hz), 121.0, 115.0, 113.2, 53.1 (q,  $J = 3.0$  Hz), 41.8 (q,  $J = 27.0$  Hz);  $^{19}\text{F}$  NMR (376 MHz,  $\text{CDCl}_3$ , ppm)  $\delta$  -63.32; MS (EI, 70 eV)  $m/z$  333, 250, 173, 161, 133, 109; HRMS (ESI)  $m/z$   $[\text{M} + \text{H}]^+$  calcd for  $\text{C}_{15}\text{H}_{13}\text{Cl}_2\text{F}_3\text{N}$  334.0372, found 334.0380.

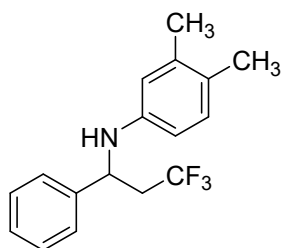

*3,4-Dimethyl-N-(3,3,3-trifluoro-1-phenylpropyl)aniline (5l)*. Eluent: petroleum ether/ethyl acetate (v/v = 30:1). Yellow liquid : 59% (17.2 mg, 0.06 mmol); IR (KBr,  $\text{cm}^{-1}$ ) 3396, 3029, 2924, 2868, 1620, 1510, 1458, 1378, 1261, 1137, 1082, 972, 849, 702;  $^1\text{H}$  NMR (400 MHz,  $\text{CDCl}_3$ , ppm)  $\delta$  7.40-7.33 (m, 4H), 7.30-7.27 (m, 1H), 6.87 (d,  $J = 8.0$  Hz, 1H), 6.41 (s, 1H), 6.29 (d,  $J = 8.0$  Hz, 1H), 4.70 (q,  $J = 8.0$  Hz, 4.0 Hz,

1H), 2.67-2.55 (m, 2H), 2.14 (s, 3H), 2.12 (s, 3H);  $^{13}\text{C}\{^1\text{H}\}$  NMR (100 MHz,  $\text{CDCl}_3$ , ppm)  $\delta$  144.4, 142.0, 137.3, 130.2, 129.0, 127.8, 126.3, 126.2, 123.2 (d,  $J = 242.0$  Hz), 115.6, 111.0, 53.4 (q,  $J = 3.0$  Hz), 41.8 (q,  $J = 27.0$  Hz), 20.0, 18.6;  $^{19}\text{F}$  NMR (376 MHz,  $\text{CDCl}_3$ , ppm)  $\delta$  -63.28; MS (EI, 70 eV)  $m/z$  293, 248, 231, 210, 132, 109; HRMS (ESI)  $m/z$   $[\text{M} + \text{H}]^+$  calcd for  $\text{C}_{17}\text{H}_{19}\text{F}_3\text{N}$  294.1464, found 294.1475.

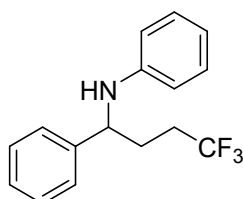

*N*-(4,4,4-Trifluoro-1-phenylbutyl)aniline (**7a**). Eluent: petroleum ether/ethyl acetate (v/v = 30:1). Yellow liquid: 50% (14.0 mg, 0.05 mmol); IR (KBr,  $\text{cm}^{-1}$ ) 3395, 3057, 2924, 2869, 1600, 1564, 1457, 1379, 1223, 1182, 1085, 983, 843, 751;  $^1\text{H}$  NMR (400 MHz,  $\text{CDCl}_3$ , ppm)  $\delta$  7.35-7.30 (m, 4H), 7.25-7.23(m, 1H), 7.10 (t,  $J = 8.0$  Hz, 2H), 6.67 (t,  $J = 8.0$  Hz, 1H), 6.54 (d,  $J = 8.0$  Hz, 2H), 4.38 (t,  $J = 8.0$  Hz, 1H), 4.00 (s, 1H), 2.27-1.99 (m, 4H);  $^{13}\text{C}\{^1\text{H}\}$  NMR (100 MHz,  $\text{CDCl}_3$ , ppm)  $\delta$  146.8, 142.4, 129.3, 129.9, 128.8 (q,  $J = 45.0$  Hz), 127.6, 126.3, 117.9, 113.5, 57.0, 31.0 (d,  $J = 29.0$  Hz), 30.6 (q,  $J = 3.0$  Hz);  $^{19}\text{F}$  NMR (376 MHz,  $\text{CDCl}_3$ , ppm)  $\delta$  -66.04; MS (EI, 70 eV)  $m/z$  279, 260, 202, 182, 167; HRMS (ESI)  $m/z$   $[\text{M} + \text{H}]^+$  calcd for  $\text{C}_{16}\text{H}_{17}\text{F}_3\text{N}$  280.1308, found 280.1324.

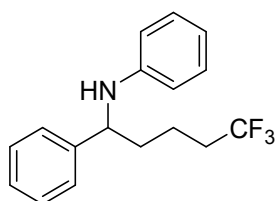

*N*-(5,5,5-Trifluoro-1-phenylpentyl)aniline (**7b**). Eluent: petroleum ether/ethyl acetate (v/v = 30:1). Yellow liquid : 45% (13.3 mg, 0.05 mmol); IR (KBr,  $\text{cm}^{-1}$ ) 3326,

3055, 2923, 2869, 1656, 1500, 1460, 1378, 1257, 1141, 1081, 974, 849, 749, 699;  $^1\text{H}$  NMR (400 MHz,  $\text{CDCl}_3$ , ppm)  $\delta$  7.33 (d,  $J = 8.0$  Hz, 4H), 7.25-7.21(m, 1H), 7.09 (t,  $J = 8.0$  Hz, 2H), 6.65 (t,  $J = 8.0$  Hz, 1H), 6.52 (d,  $J = 8.0$  Hz, 2H), 4.32 (q,  $J = 8.0$  Hz, 4.0 Hz, 1H), 4.03(s, 1H) 2.14-2.02 (m, 2H), 1.94-1.79 (m, 2H), 1.75-1.58 (m, 2H);  $^{13}\text{C}\{^1\text{H}\}$  NMR (100 MHz,  $\text{CDCl}_3$ , ppm)  $\delta$  147.1, 143.3, 129.2, 128.8, 127.5 (q,  $J = 172$  Hz), 127.3, 126.3, 117.5, 113.3, 57.8, 37.6, 33.5 (q,  $J = 28.0$  Hz), 19.0 (q,  $J = 3.0$  Hz);  $^{19}\text{F}$  NMR (376 MHz,  $\text{CDCl}_3$ , ppm)  $\delta$  -66.09; MS (EI, 70 eV)  $m/z$  293, 263, 200, 182, 167; HRMS (ESI)  $m/z$   $[\text{M} + \text{H}]^+$  calcd for  $\text{C}_{17}\text{H}_{19}\text{F}_3\text{N}$  294.1464, found 294.1465.

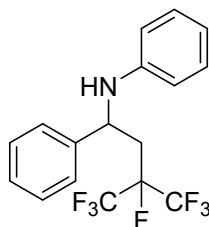

*N*-(3,4,4,4-Tetrafluoro-1-phenyl-3-(trifluoromethyl)butyl)aniline (**7c**). Eluent: petroleum ether/ethyl acetate (v/v = 30:1). Yellow liquid: 43% (16.1 mg, 0.04 mmol); IR (KBr,  $\text{cm}^{-1}$ ) 3389, 3029, 2927, 2856, 1603, 1508, 1429, 1317, 1154, 1028, 961, 871, 750, 699;  $^1\text{H}$  NMR (400 MHz,  $\text{CDCl}_3$ , ppm)  $\delta$  7.40-7.34 (m, 4H), 7.31-7.29 (m, 1H), 7.11 (t,  $J = 8.0$  Hz, 2H), 6.71 (t,  $J = 8.0$  Hz, 1H), 6.51 (d,  $J = 8.0$  Hz, 2H), 4.76 (q,  $J = 8.0$  Hz, 4.0 Hz, 1H), 4.15 (s, 1H), 2.65-2.46 (m, 2H);  $^{13}\text{C}\{^1\text{H}\}$  NMR (100 MHz,  $\text{CDCl}_3$ , ppm)  $\delta$  146.2, 142.4, 129.4, 129.2 (d,  $J = 5.0$  Hz), 128.0, 126.0, 118.3, 117.8, 113.6, 112.9, 53.4, 36.7 (d,  $J = 19.0$  Hz);  $^{19}\text{F}$  NMR (376 MHz,  $\text{CDCl}_3$ , ppm)  $\delta$  -75.72, -76.94; MS (EI, 70 eV)  $m/z$  365, 337, 306, 273, 182; HRMS (ESI)  $m/z$   $[\text{M} + \text{H}]^+$  calcd for  $\text{C}_{17}\text{H}_{15}\text{F}_7\text{N}$  366.1087, found 366.1075.

## 8. NMR Spectra

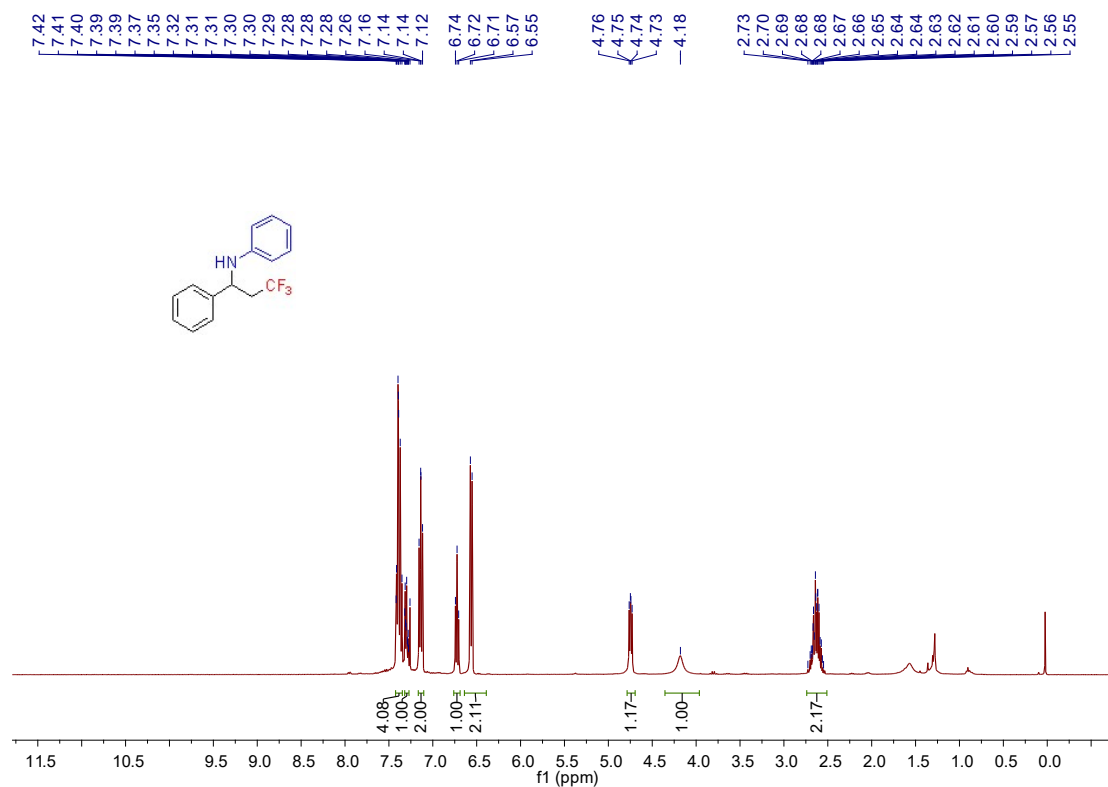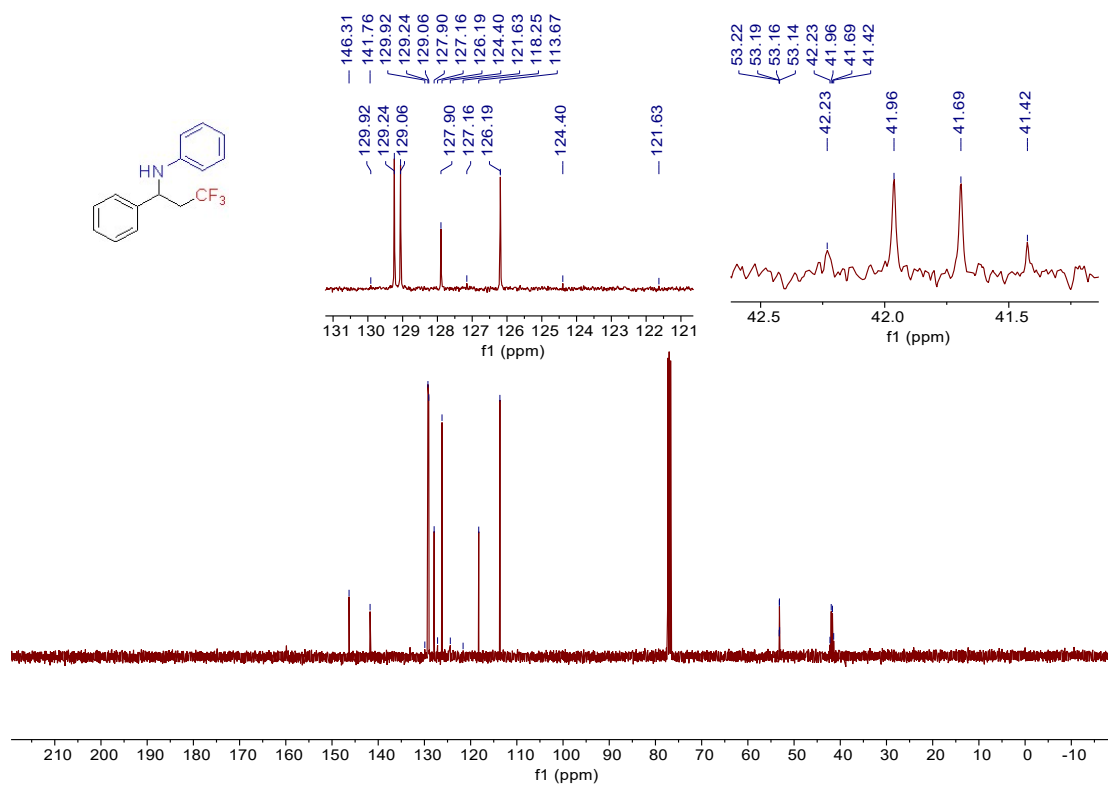

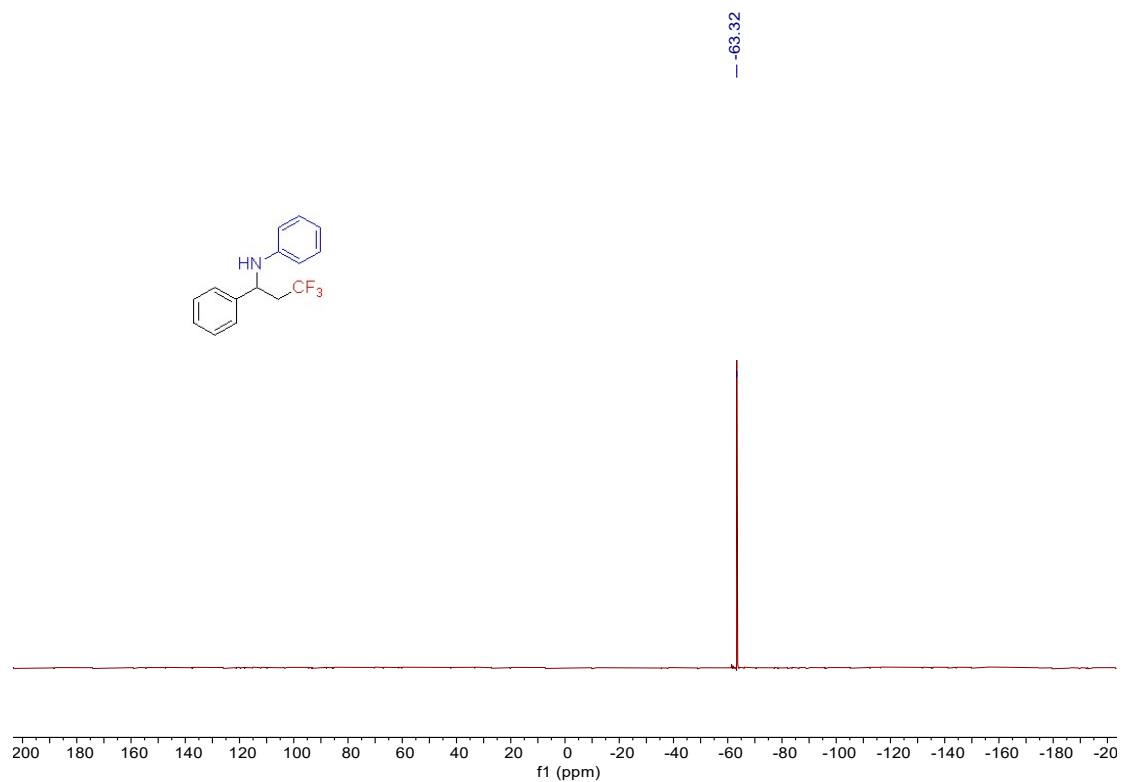

**$^{19}\text{F}$  NMR of product 4a in  $\text{CDCl}_3$  (376 MHz)**

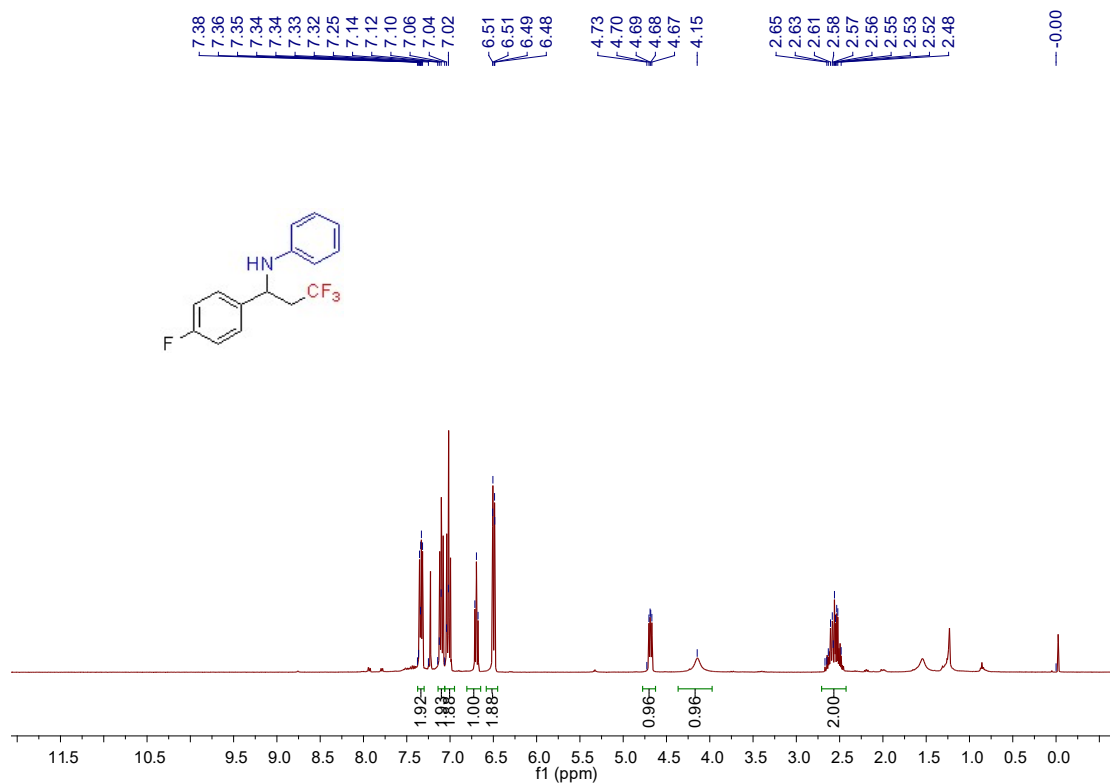

**$^1\text{H}$  NMR of product 4b in  $\text{CDCl}_3$  (400 MHz)**

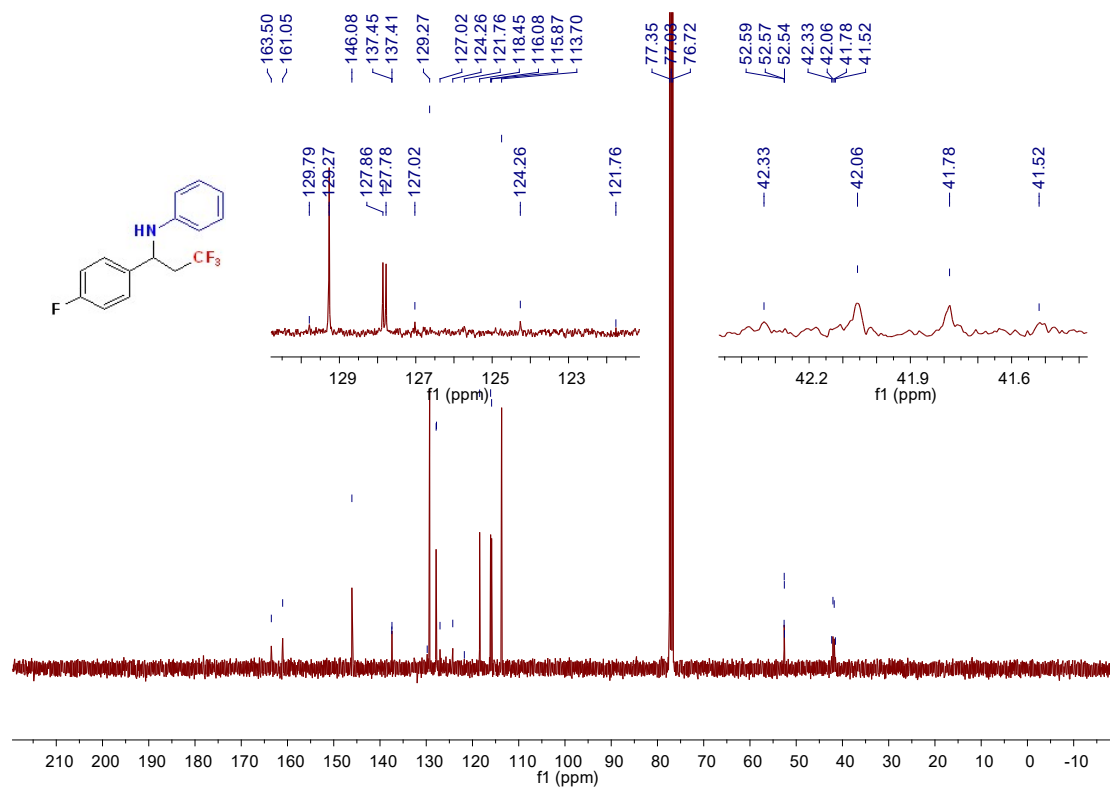

**<sup>13</sup>C NMR of product 4b in CDCl<sub>3</sub> (100 MHz)**

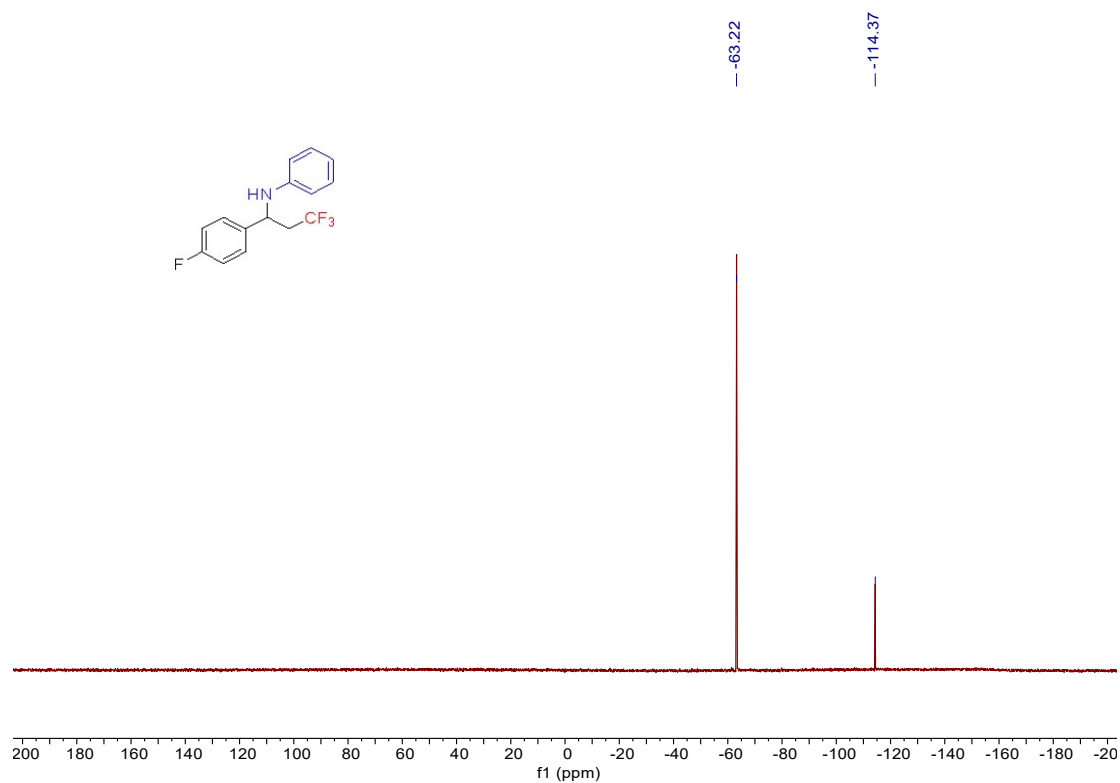

**<sup>19</sup>F NMR of product 4b in CDCl<sub>3</sub> (376 MHz)**

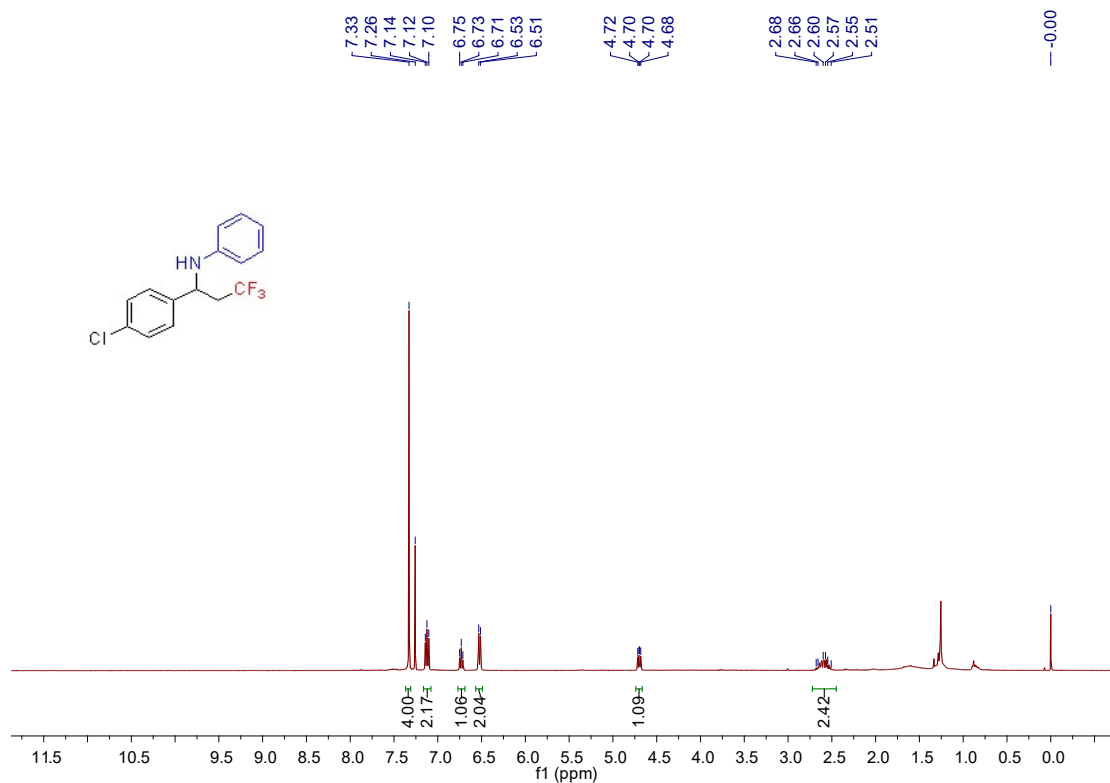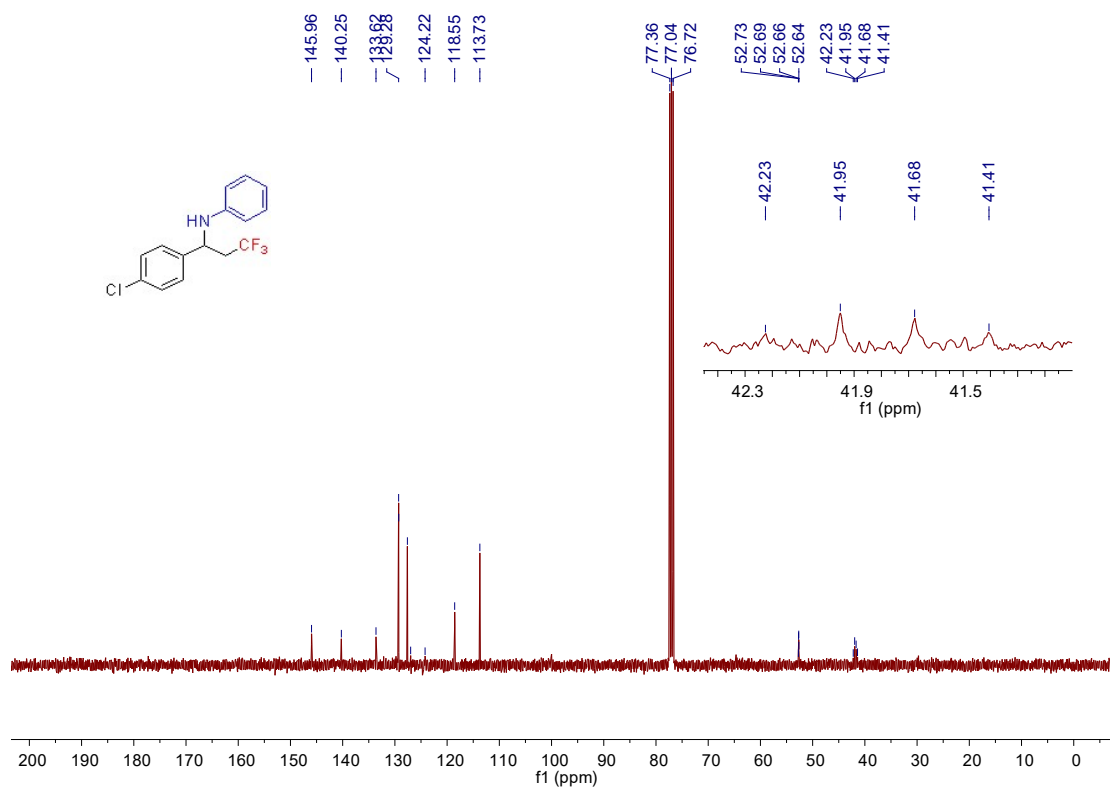



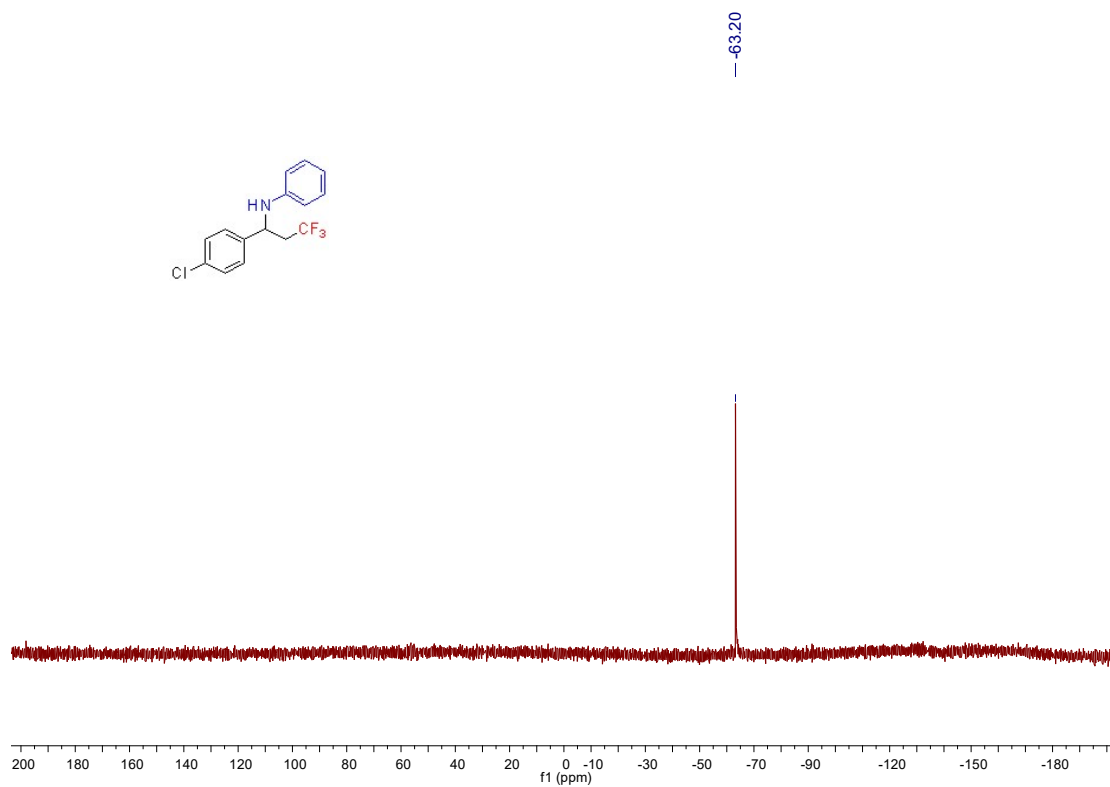

**$^{19}\text{F}$  NMR of product 4c in  $\text{CDCl}_3$  (376 MHz)**

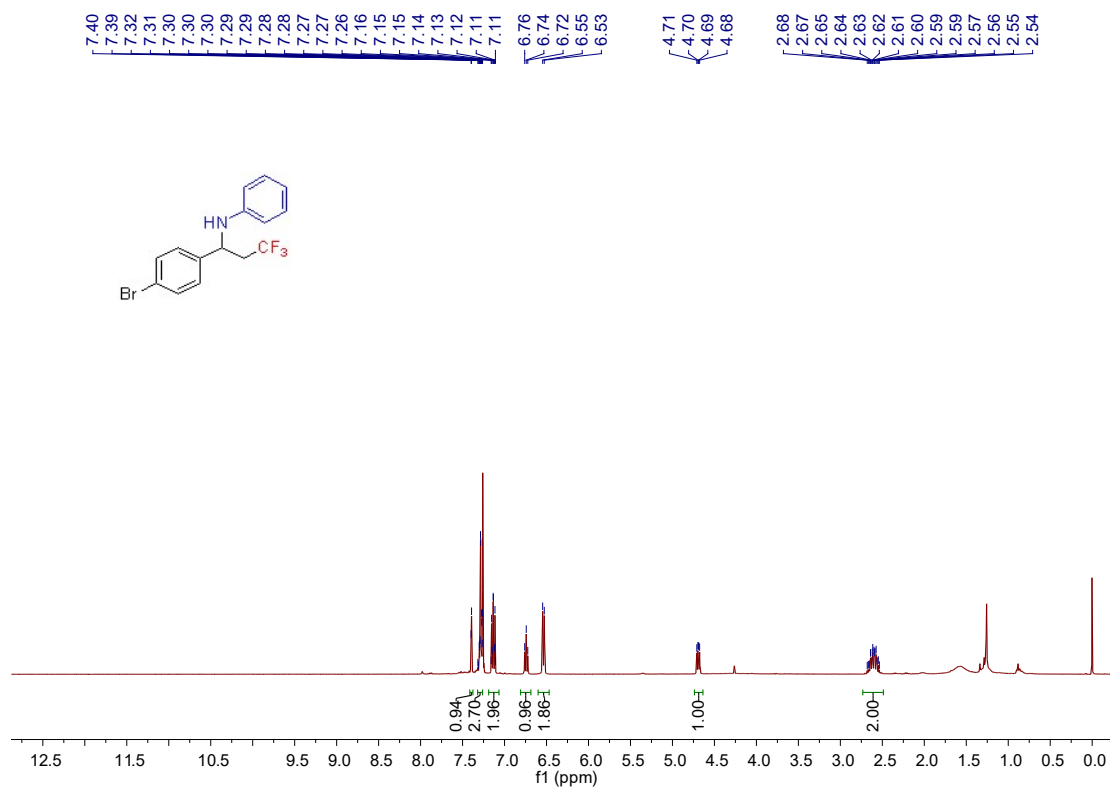

**$^1\text{H}$  NMR of product 4d in  $\text{CDCl}_3$  (400 MHz)**

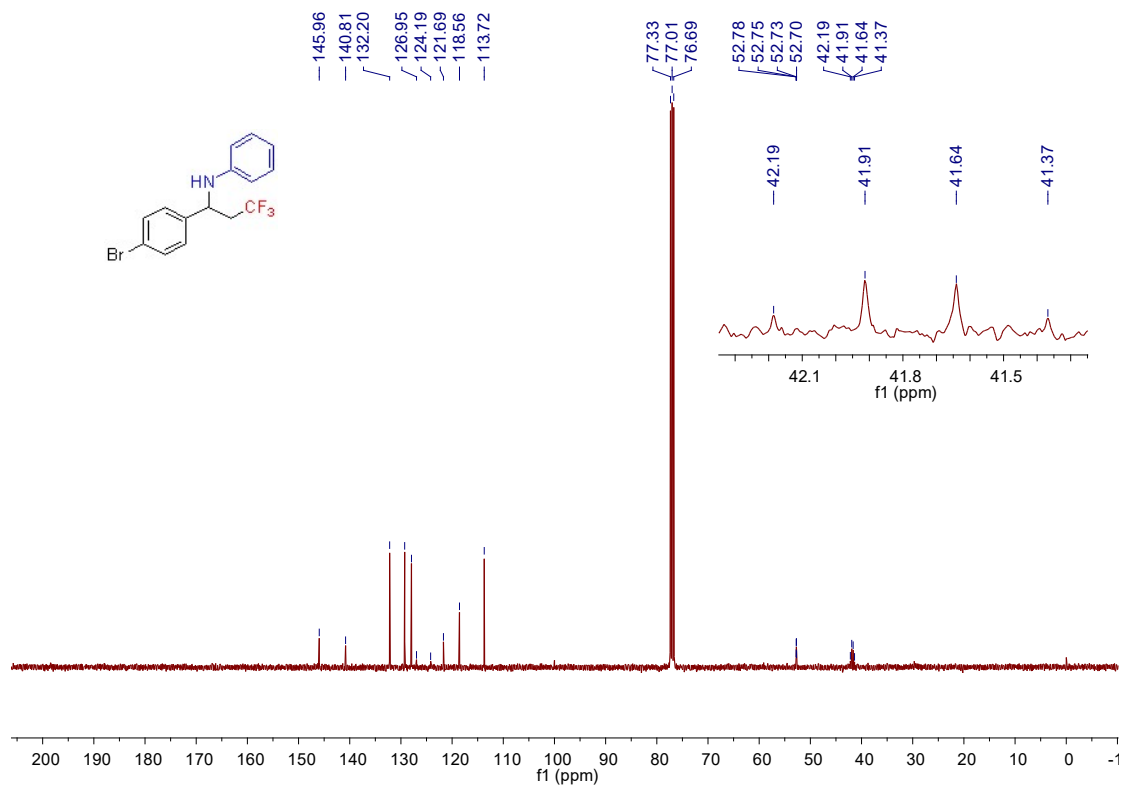

**<sup>13</sup>C NMR of product 4d in CDCl<sub>3</sub> (100 MHz)**

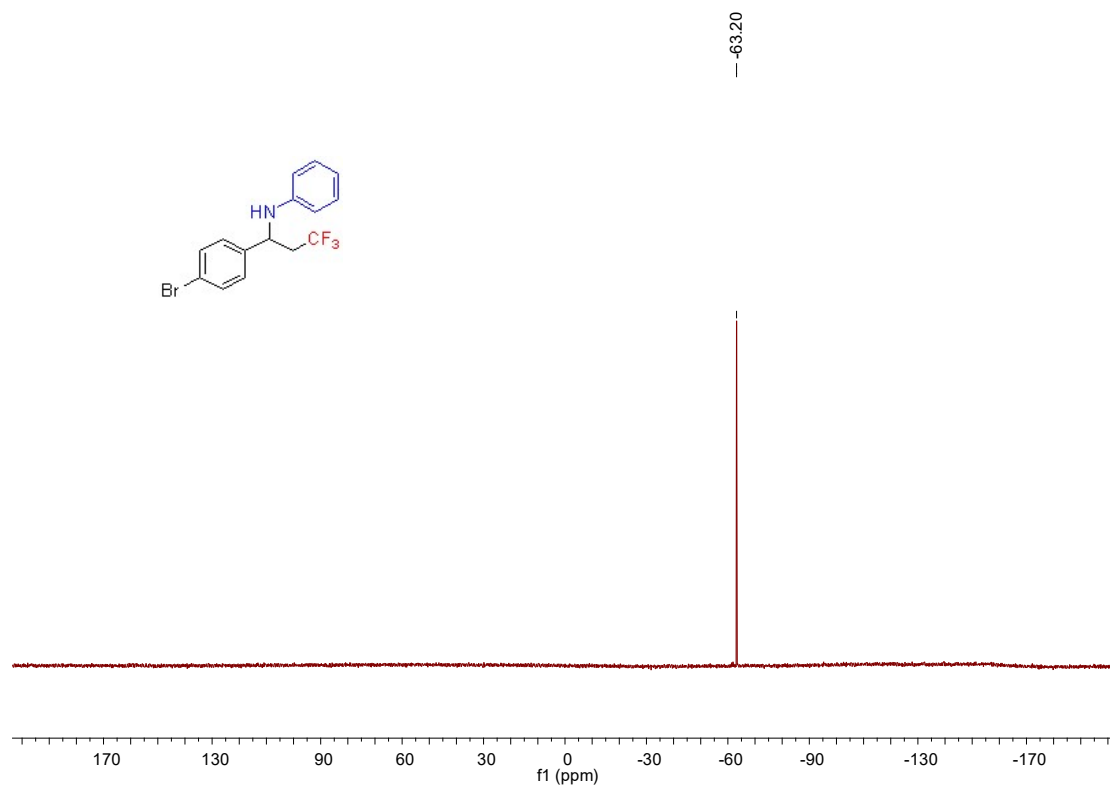

**<sup>19</sup>F NMR of product 4d in CDCl<sub>3</sub> (376 MHz)**

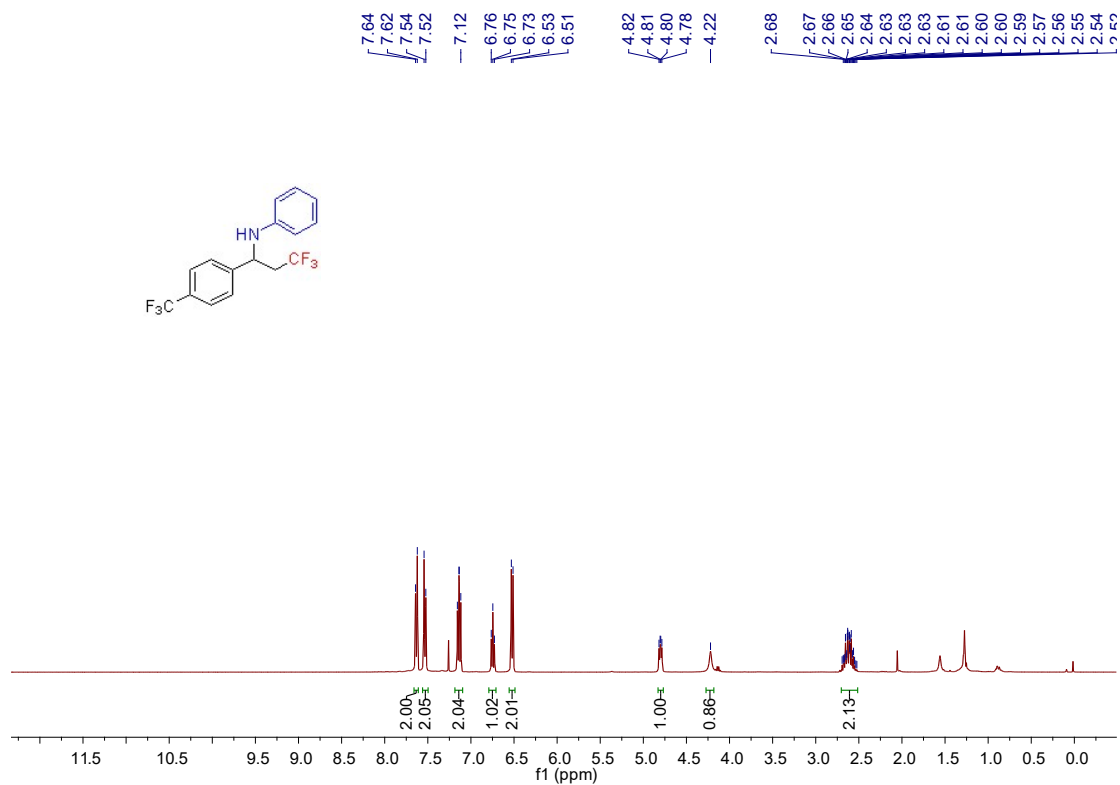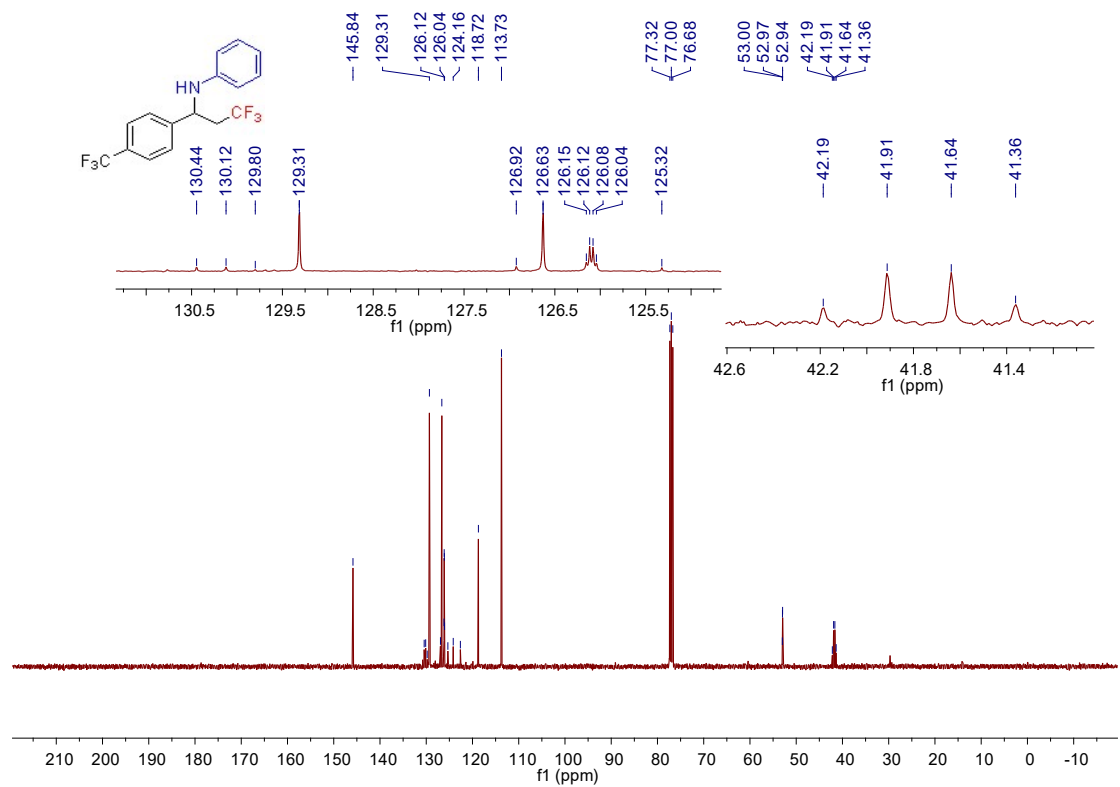

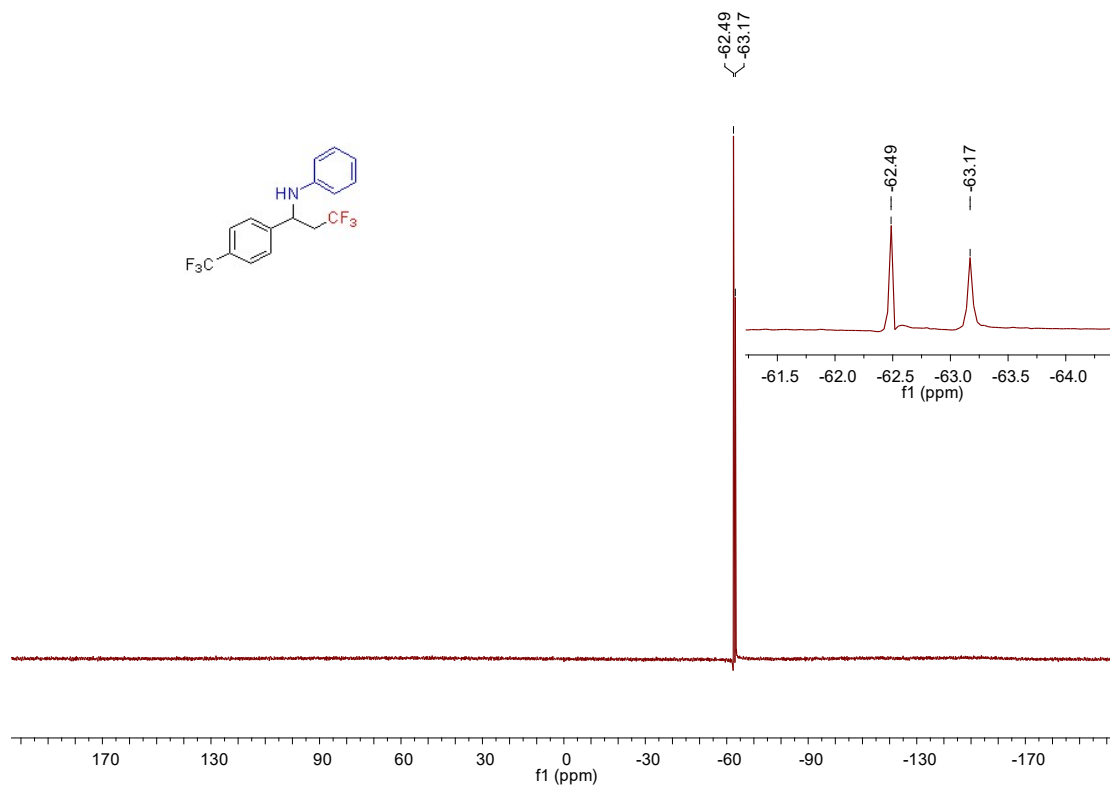

$^{19}\text{F}$  NMR of product 4e in  $\text{CDCl}_3$  (376 MHz)

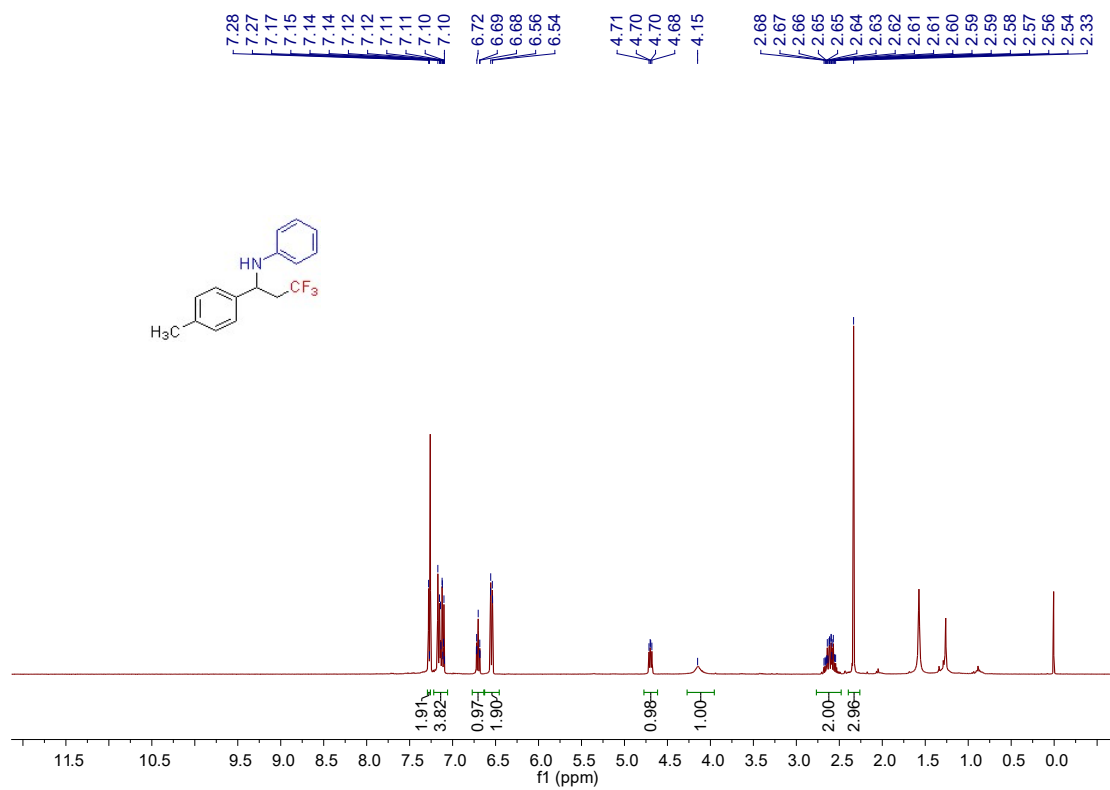

$^1\text{H}$  NMR of product 4f in  $\text{CDCl}_3$  (400 MHz)

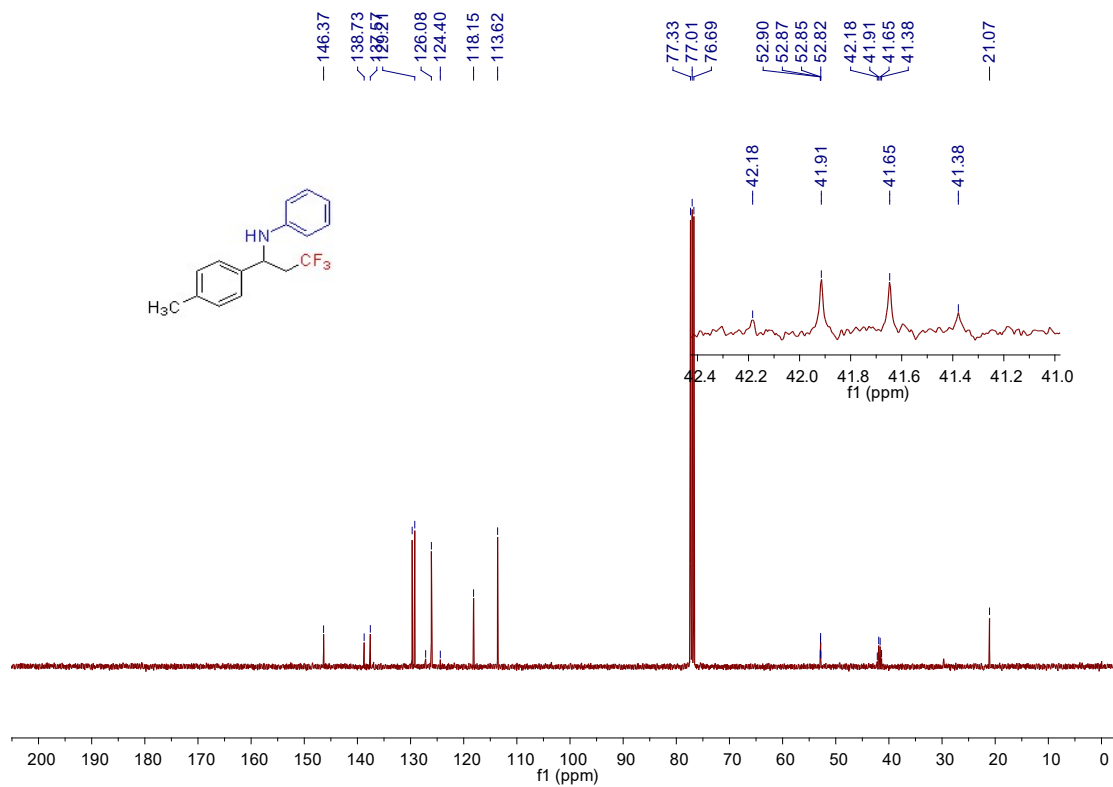

**<sup>13</sup>C NMR of product 4f in CDCl<sub>3</sub> (100 MHz)**

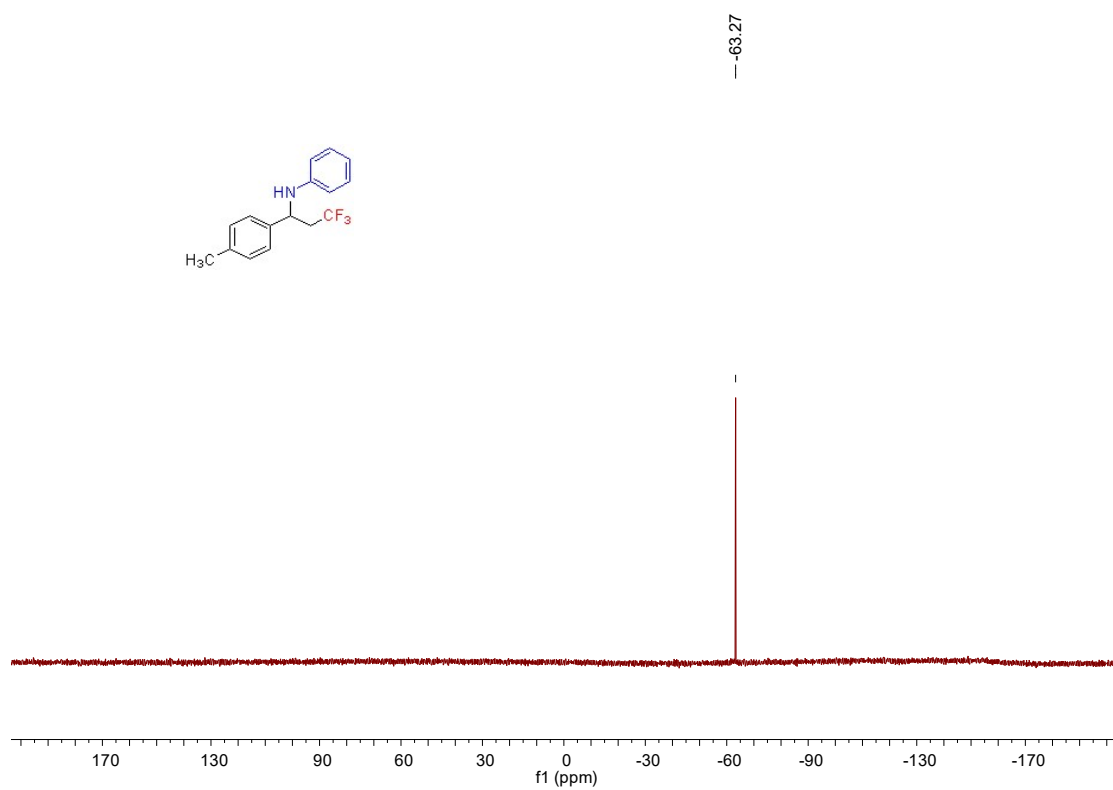

**<sup>19</sup>F NMR of product 4f in CDCl<sub>3</sub> (376 MHz)**

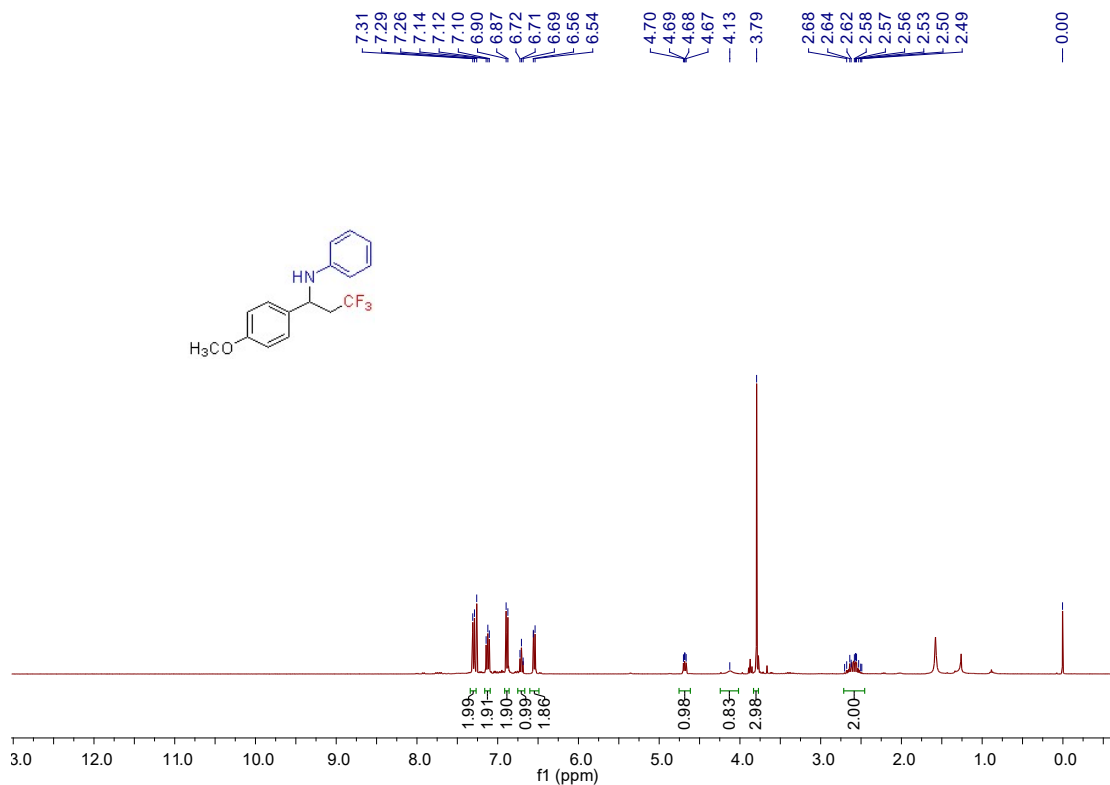

**<sup>1</sup>H NMR of product 4g in CDCl<sub>3</sub> (400 MHz)**

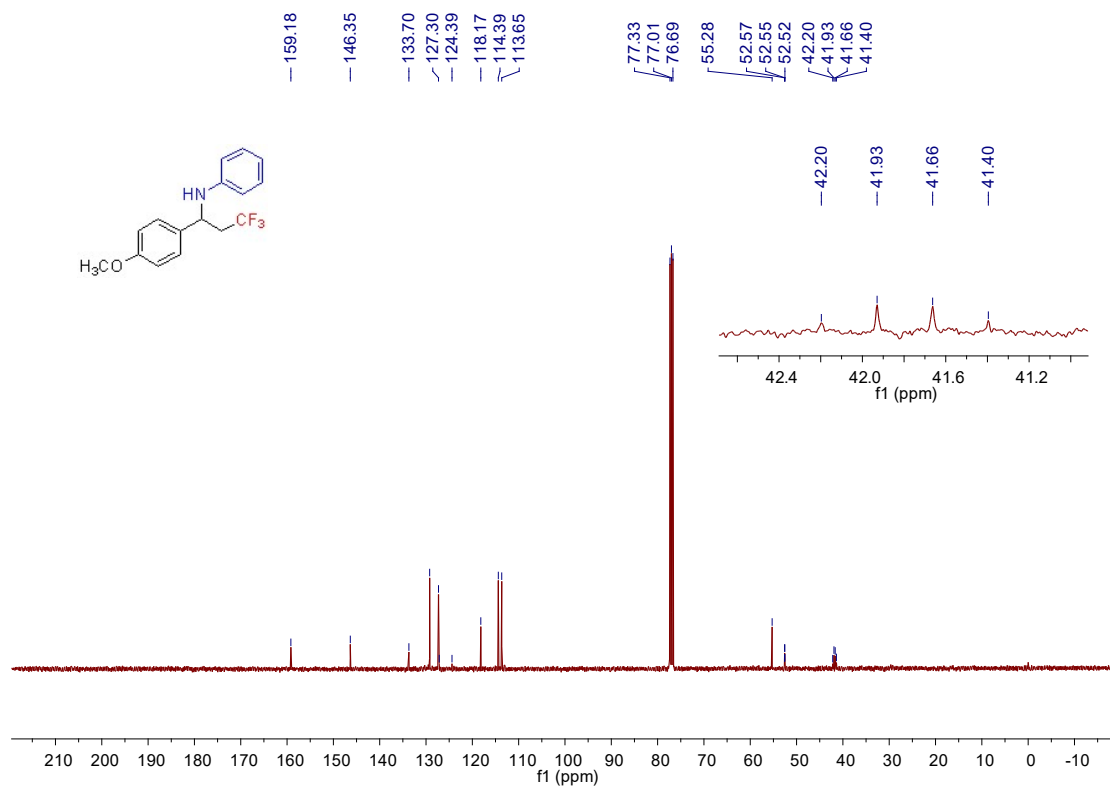

**<sup>13</sup>C NMR of product 4g in CDCl<sub>3</sub> (100 MHz)**

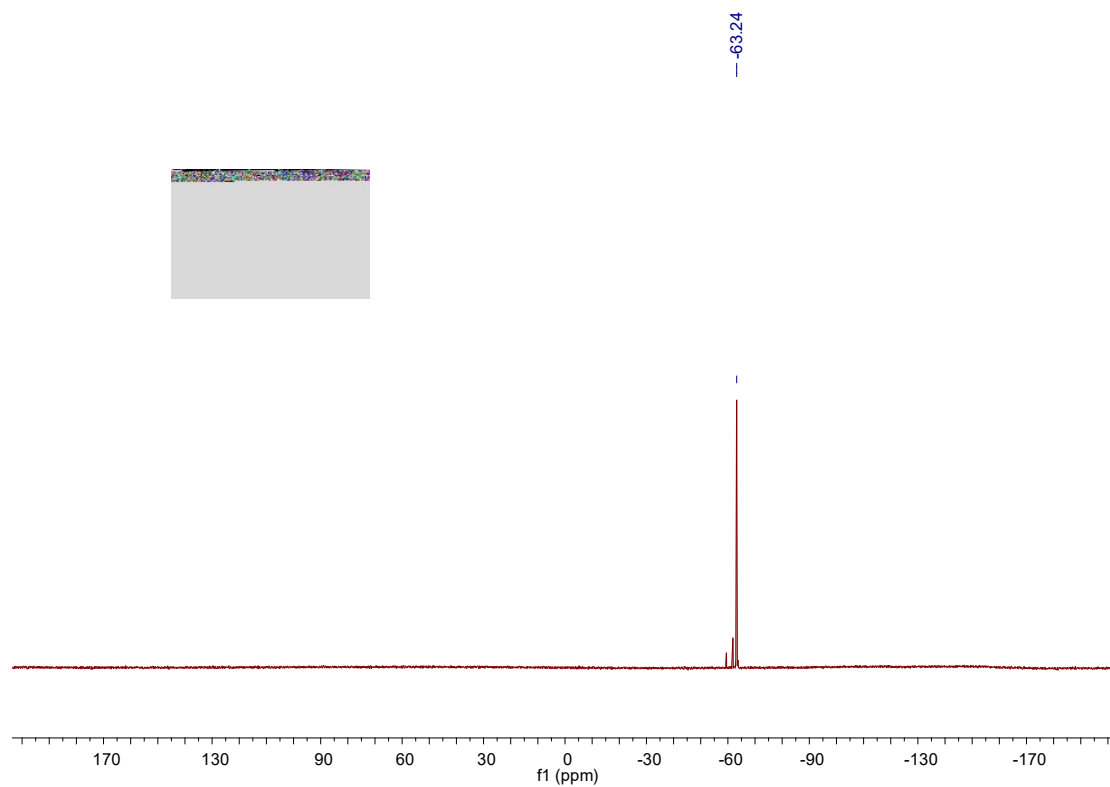

**<sup>19</sup>F NMR of product 4g in CDCl<sub>3</sub> (376 MHz)**

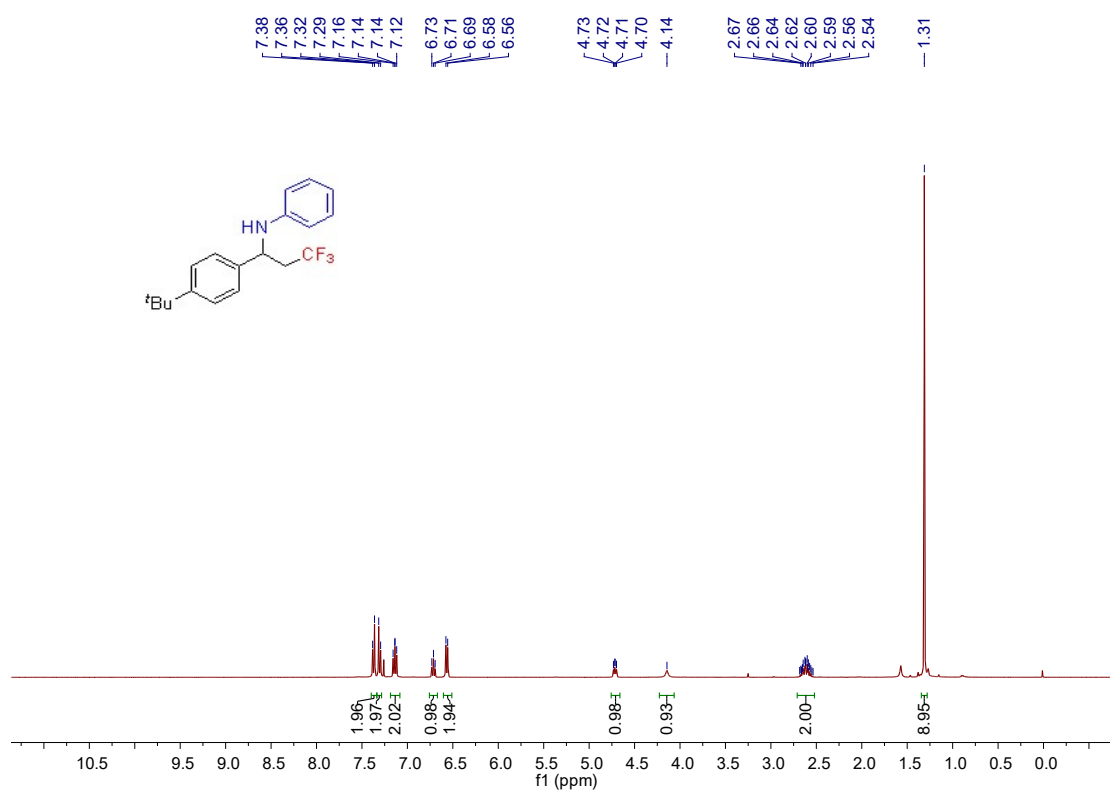

**<sup>1</sup>H NMR of product 4h in CDCl<sub>3</sub> (400 MHz)**

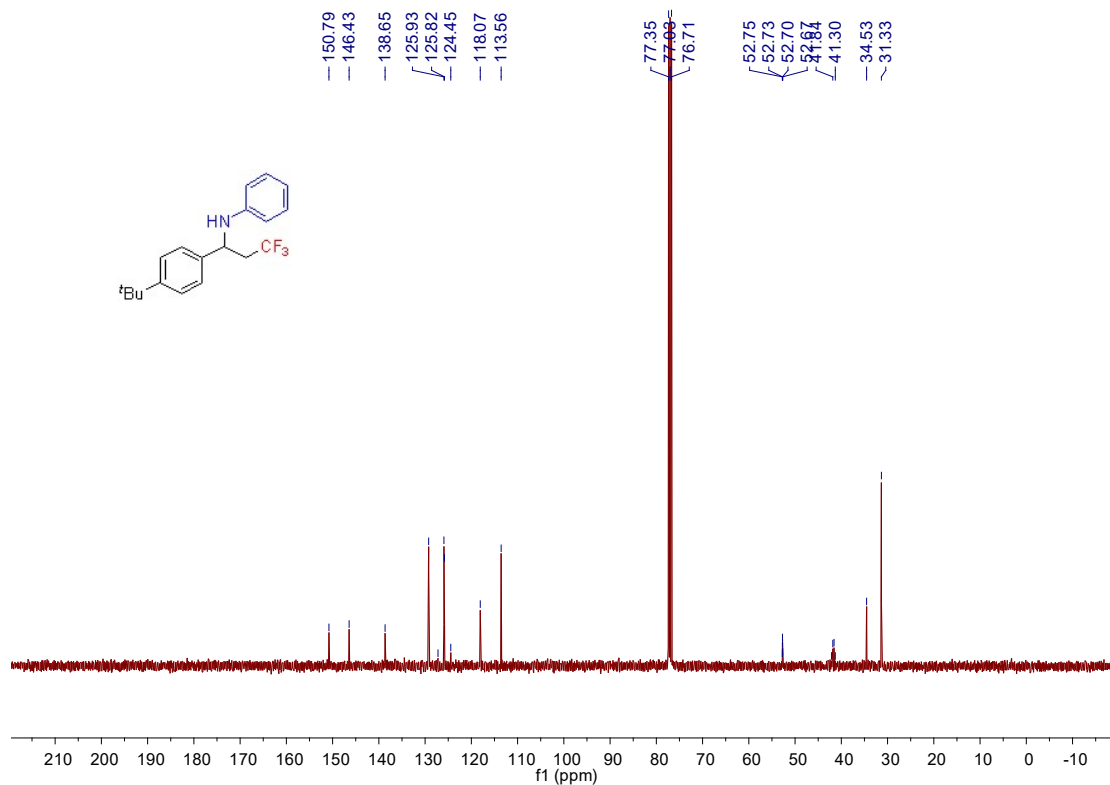

**<sup>13</sup>C NMR of product 4h in CDCl<sub>3</sub> (100 MHz)**

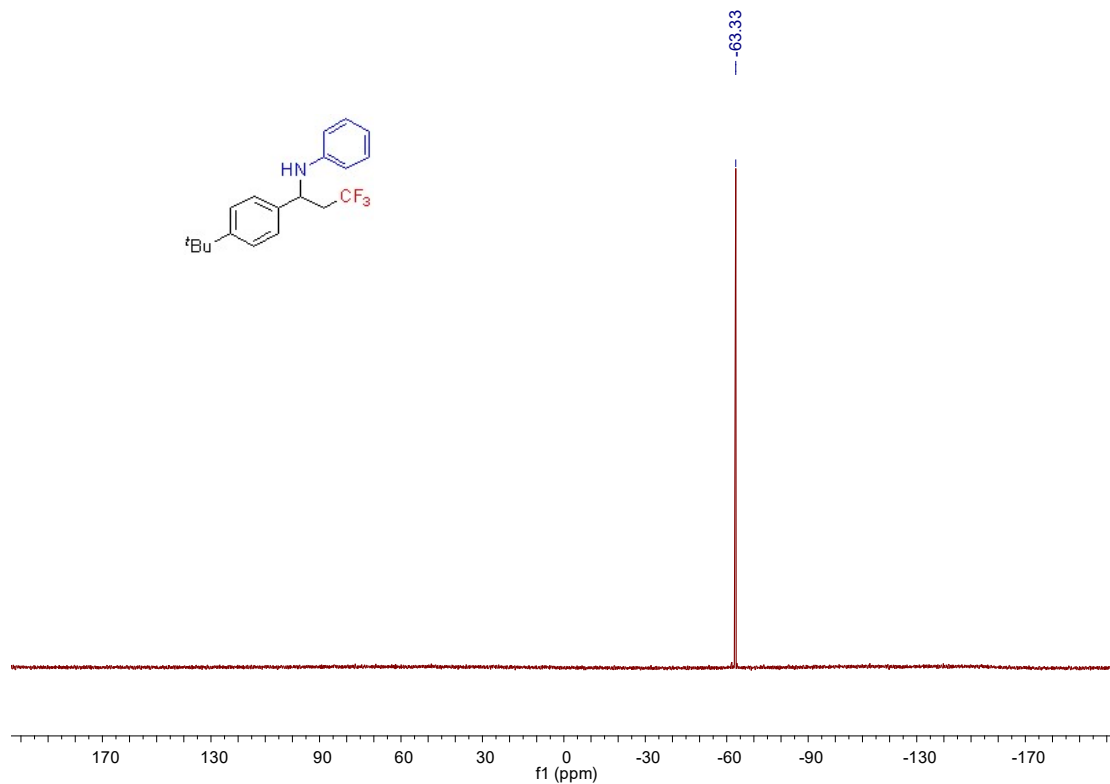

**<sup>19</sup>F NMR of product 4h in CDCl<sub>3</sub> (376 MHz)**



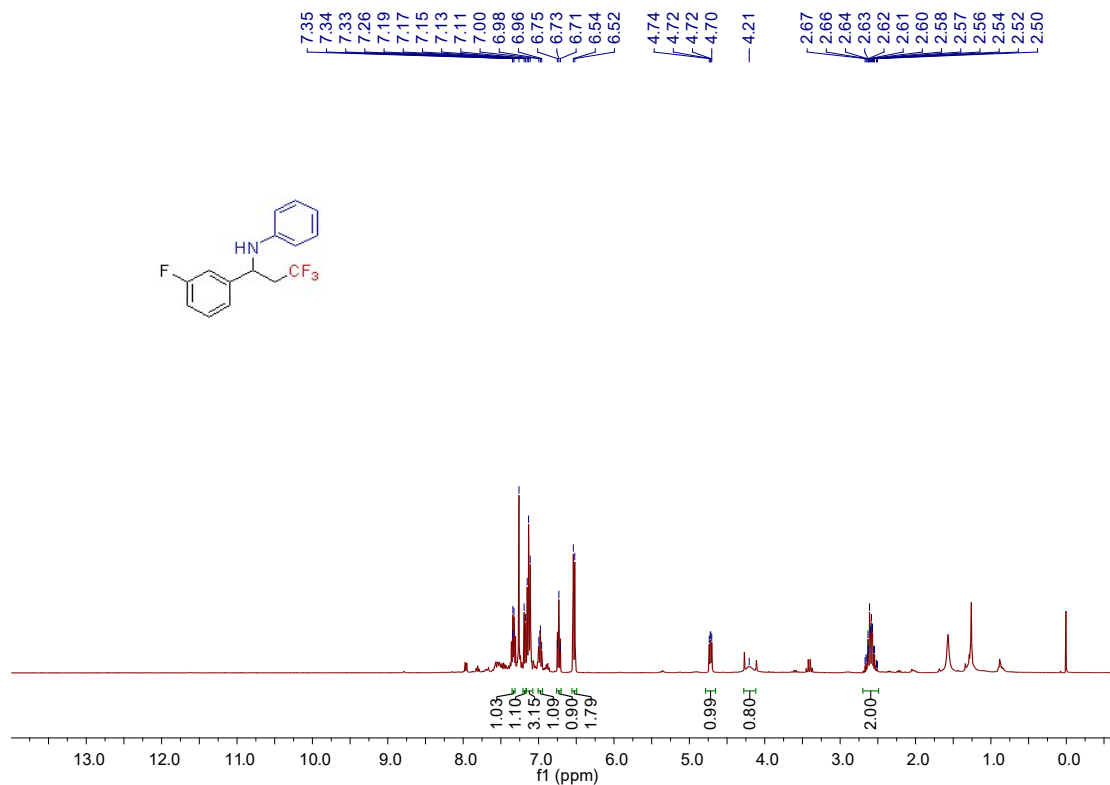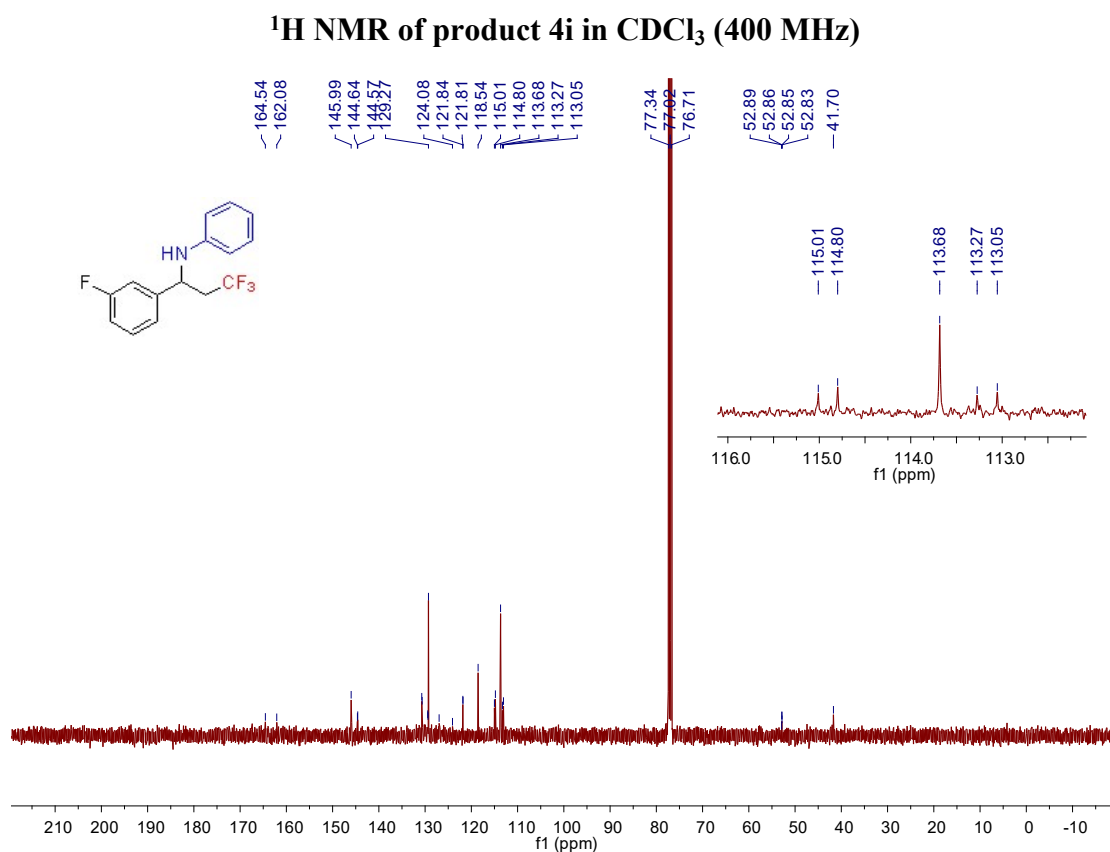

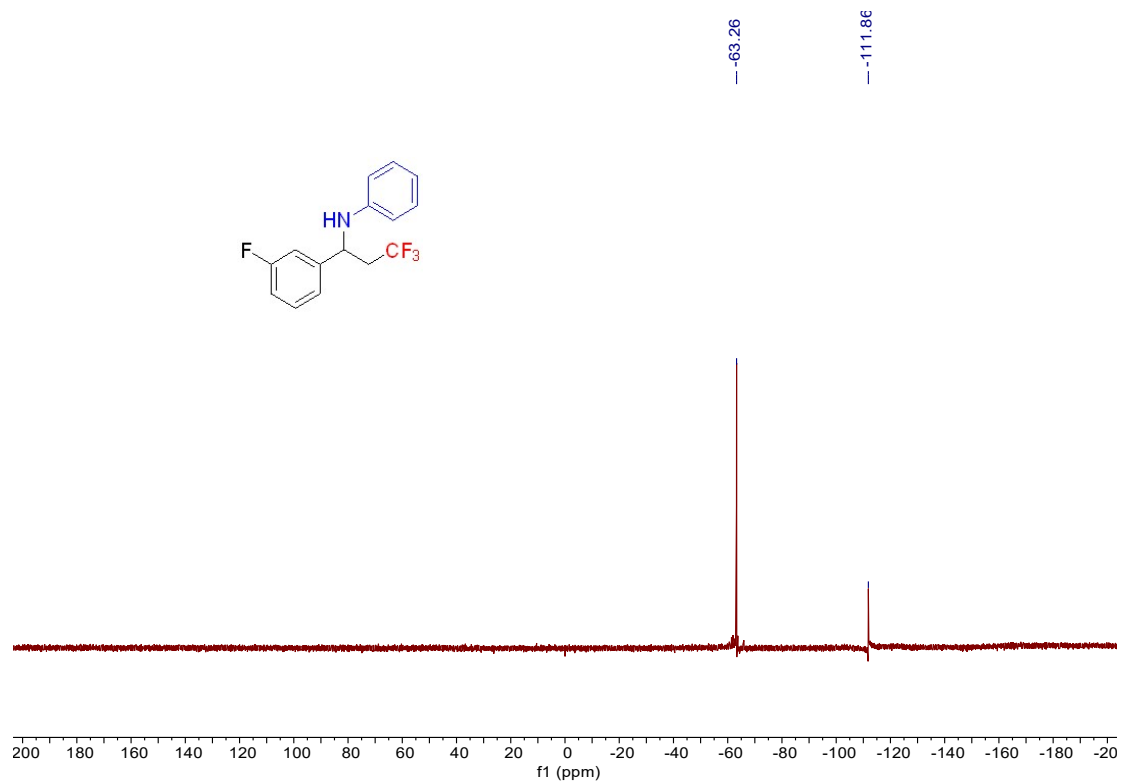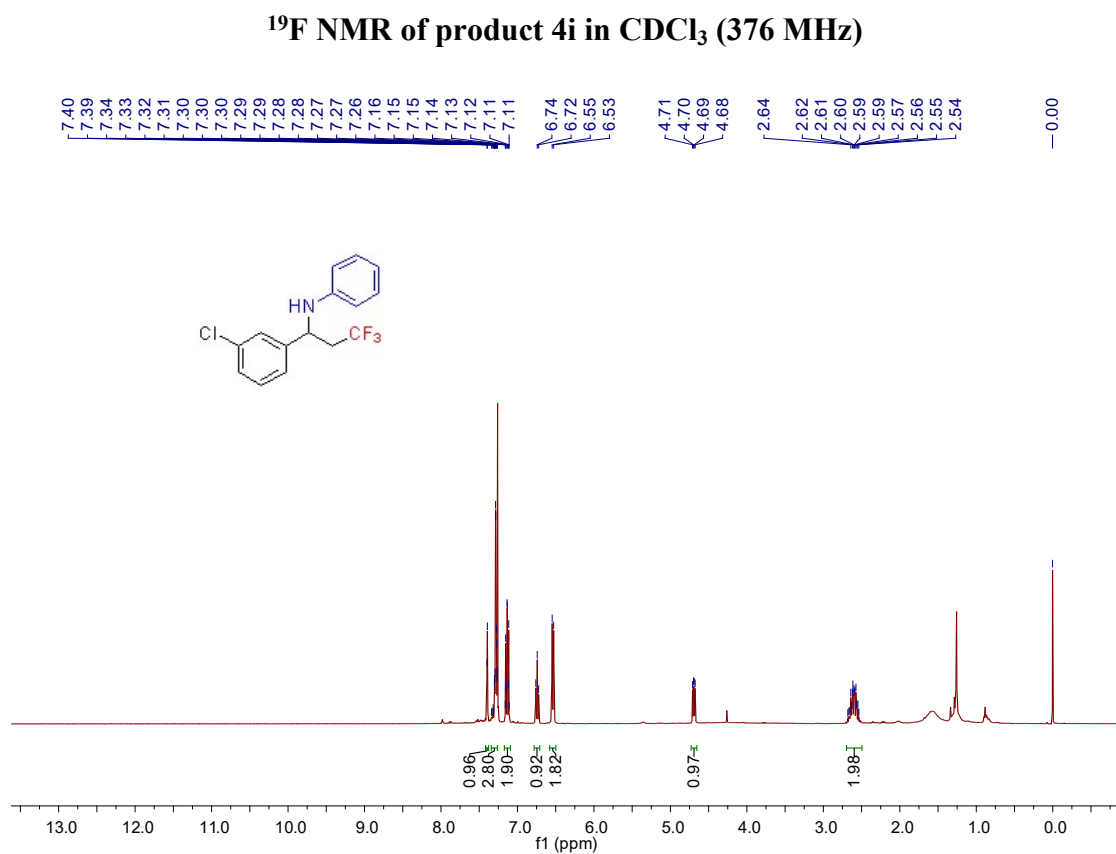

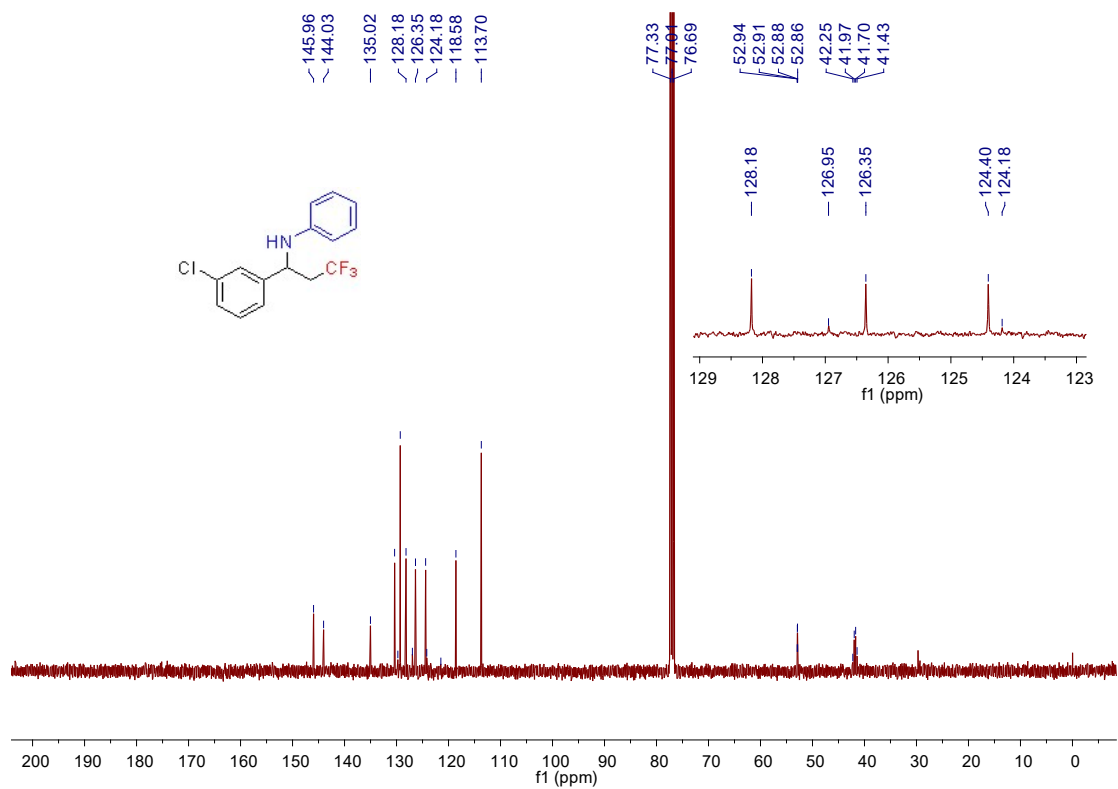

<sup>13</sup>C NMR of product 4j in CDCl<sub>3</sub> (100 MHz)

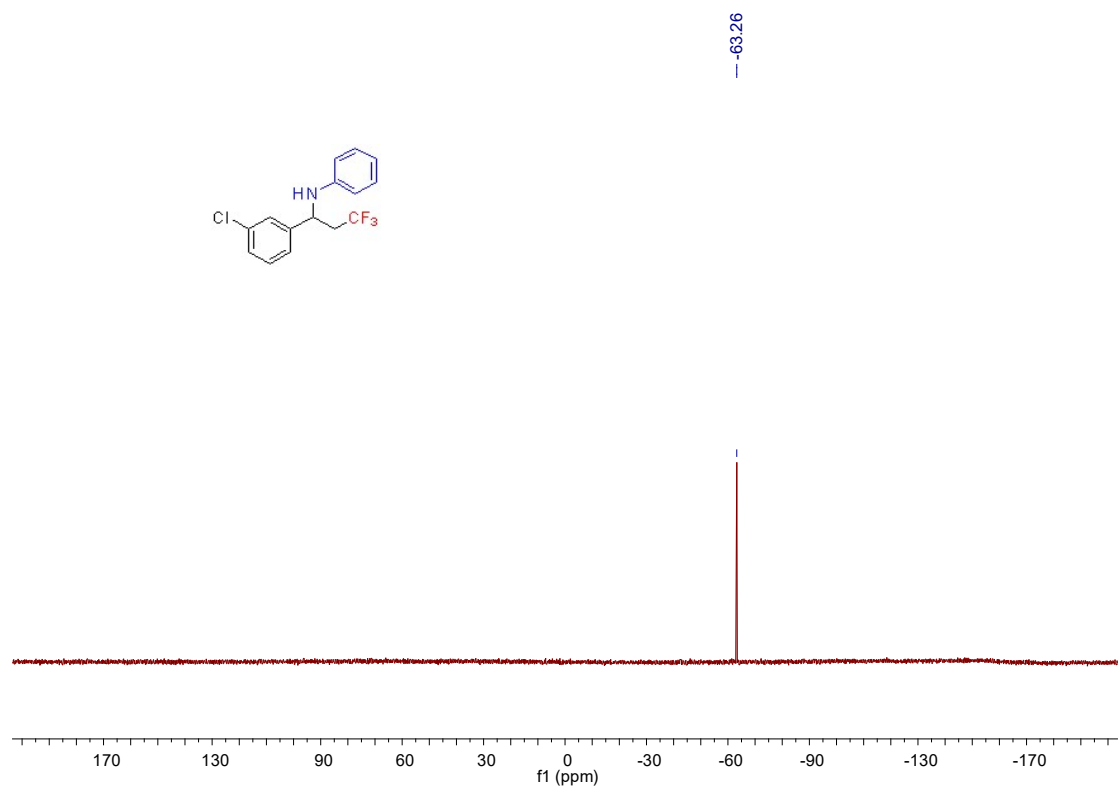

<sup>19</sup>F NMR of product 4j in CDCl<sub>3</sub> (376 MHz)

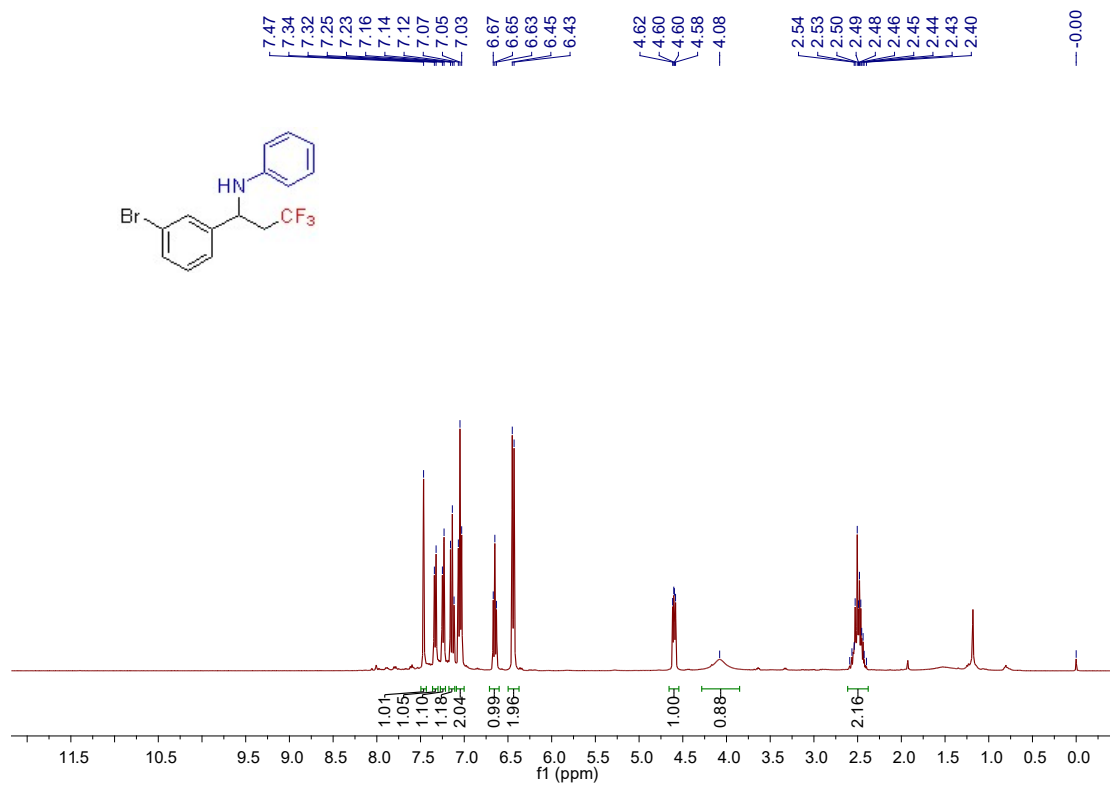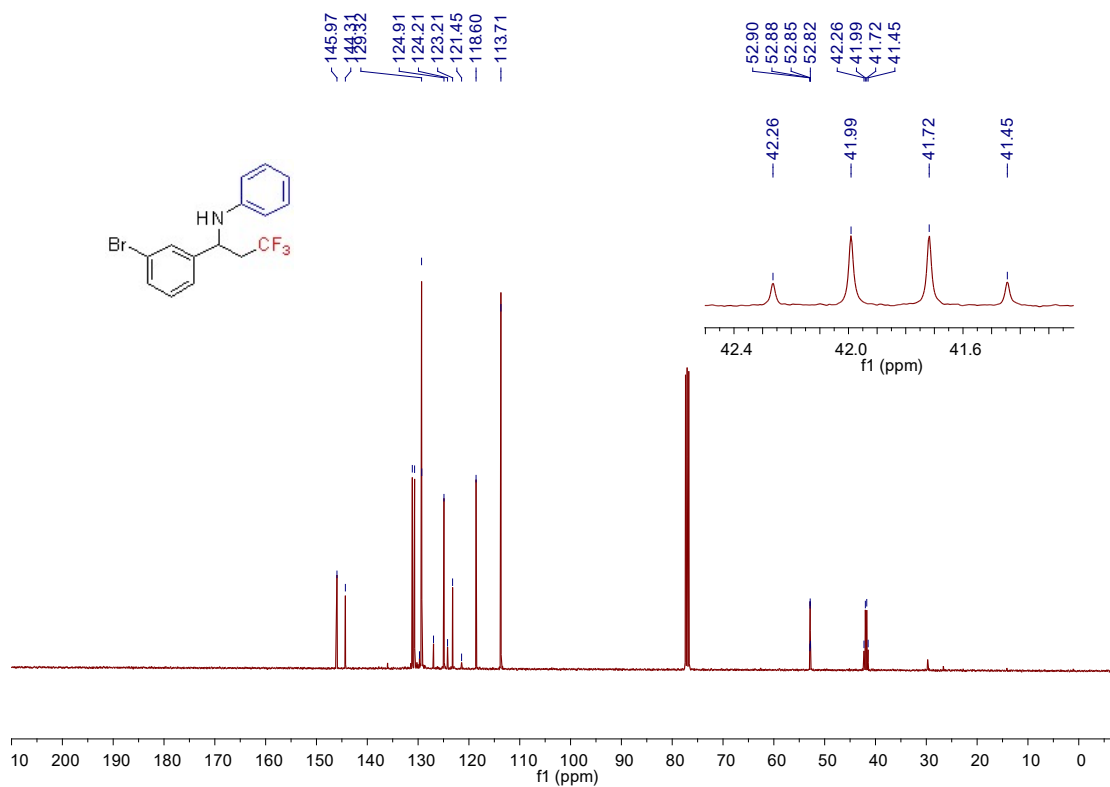

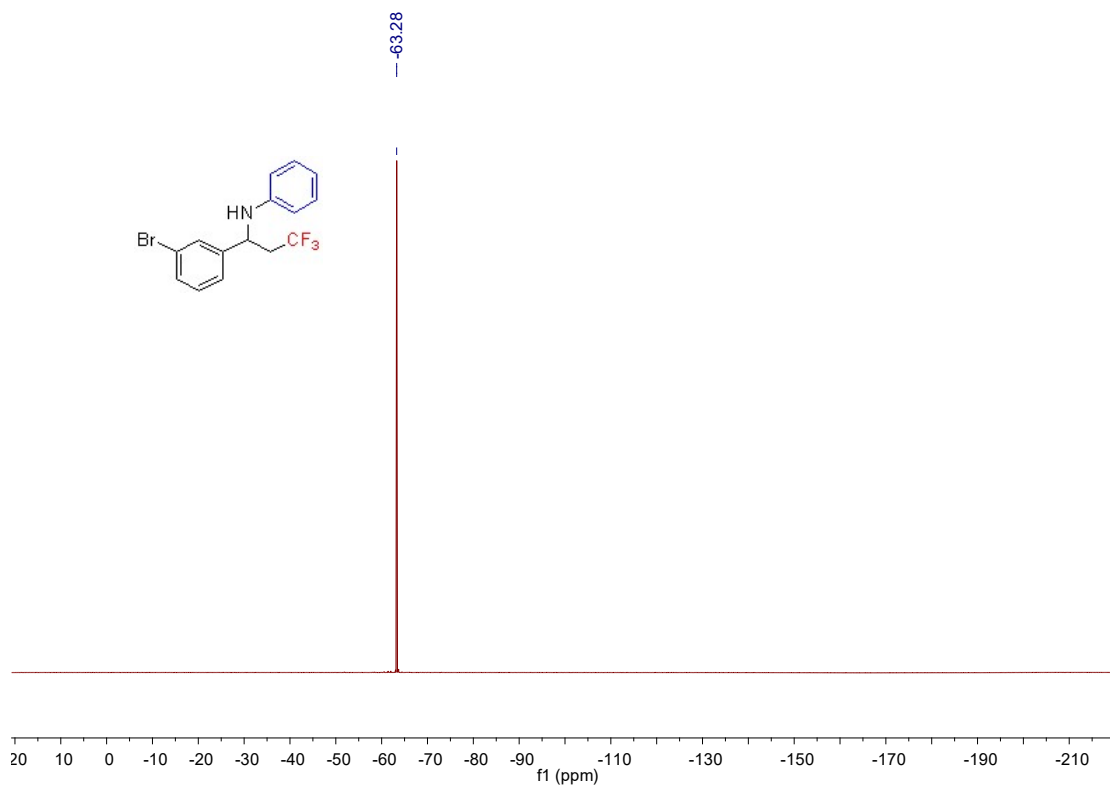

**$^{19}\text{F}$  NMR of product 4k in  $\text{CDCl}_3$  (376 MHz)**

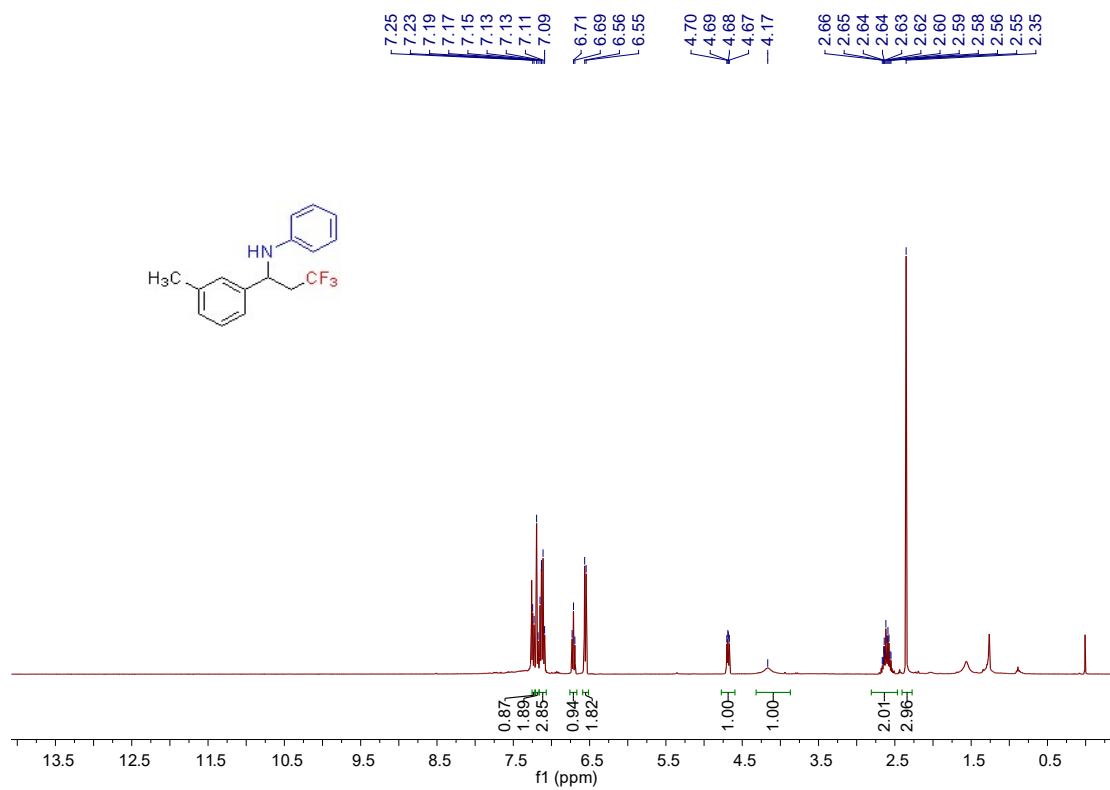

**$^1\text{H}$  NMR of product 4l in  $\text{CDCl}_3$  (400 MHz)**

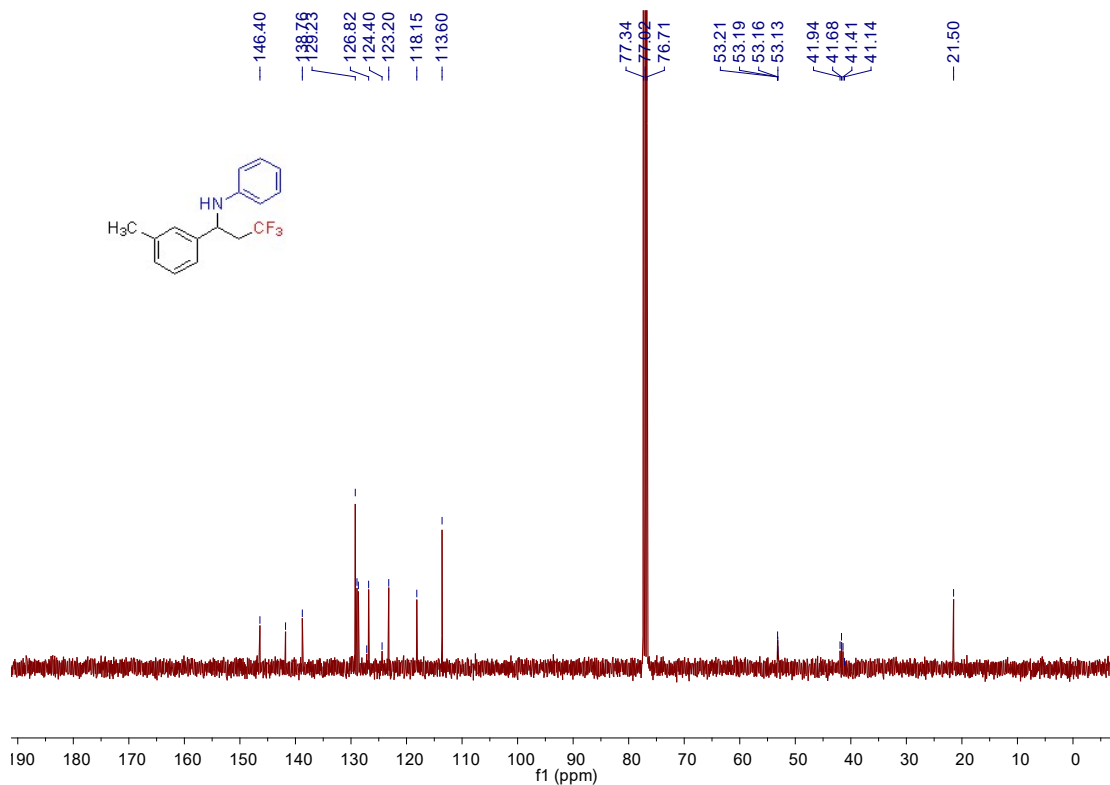

**<sup>13</sup>C NMR of product 4l in CDCl<sub>3</sub> (100 MHz)**

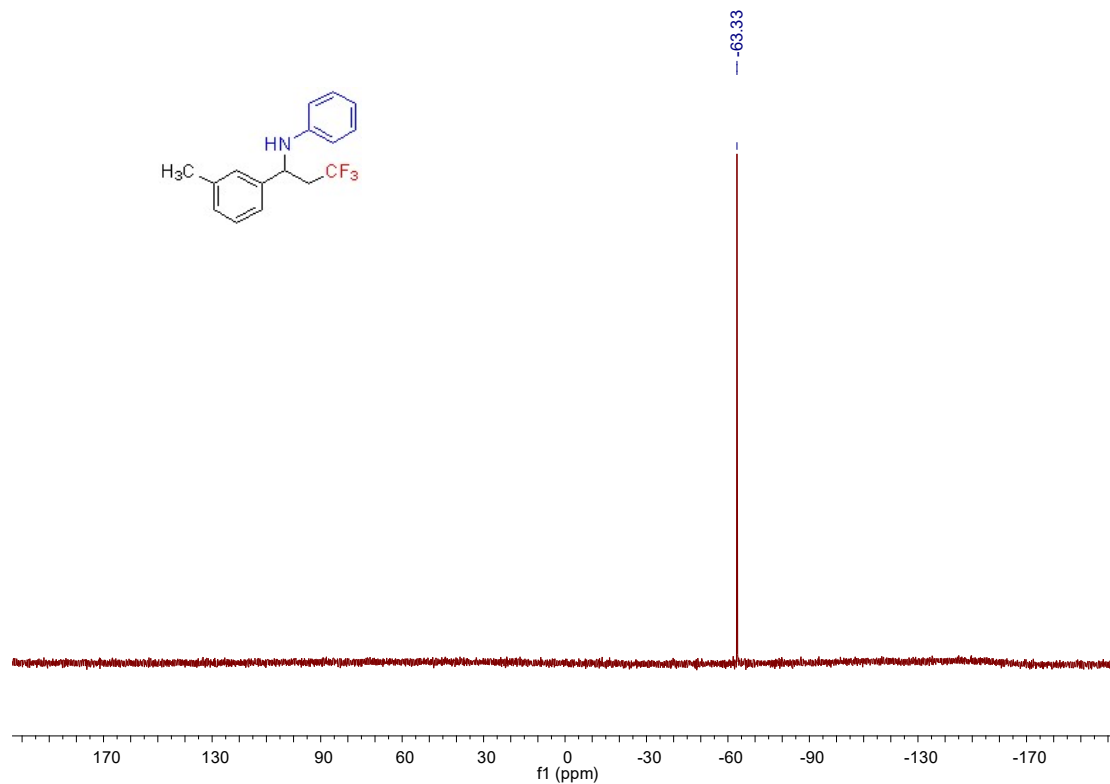

**<sup>19</sup>F NMR of product 4l in CDCl<sub>3</sub> (376 MHz)**

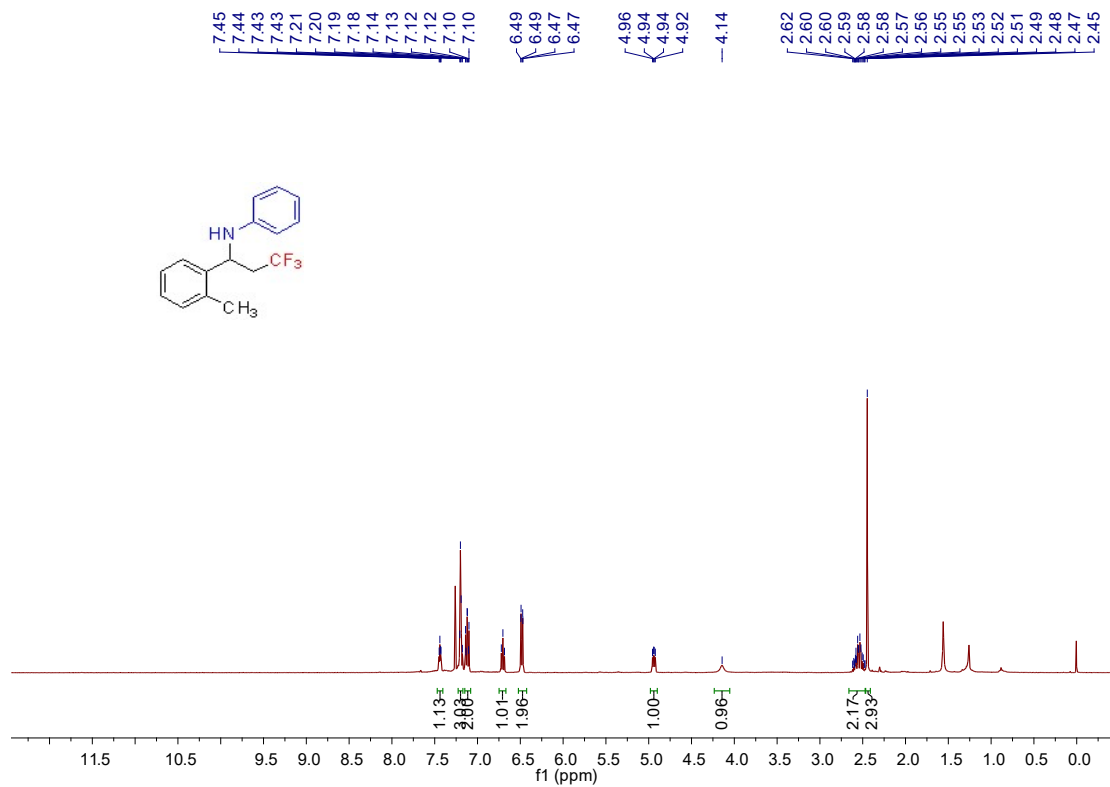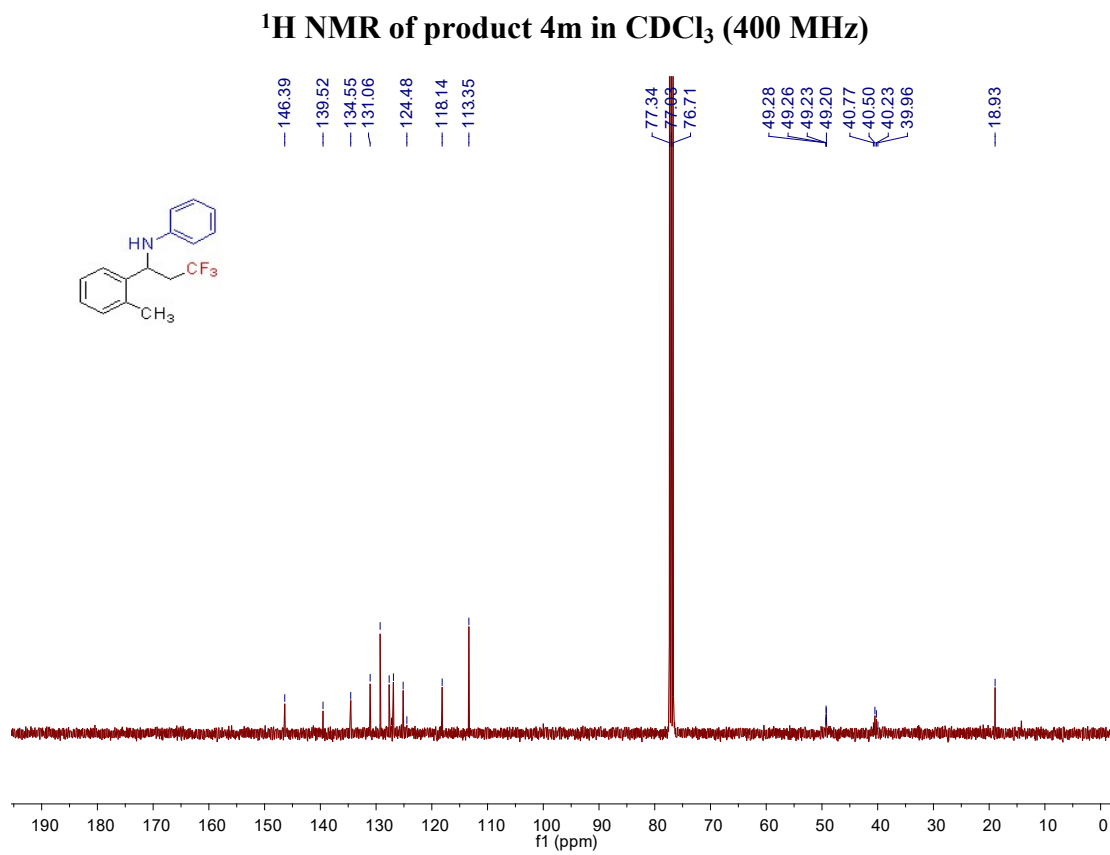

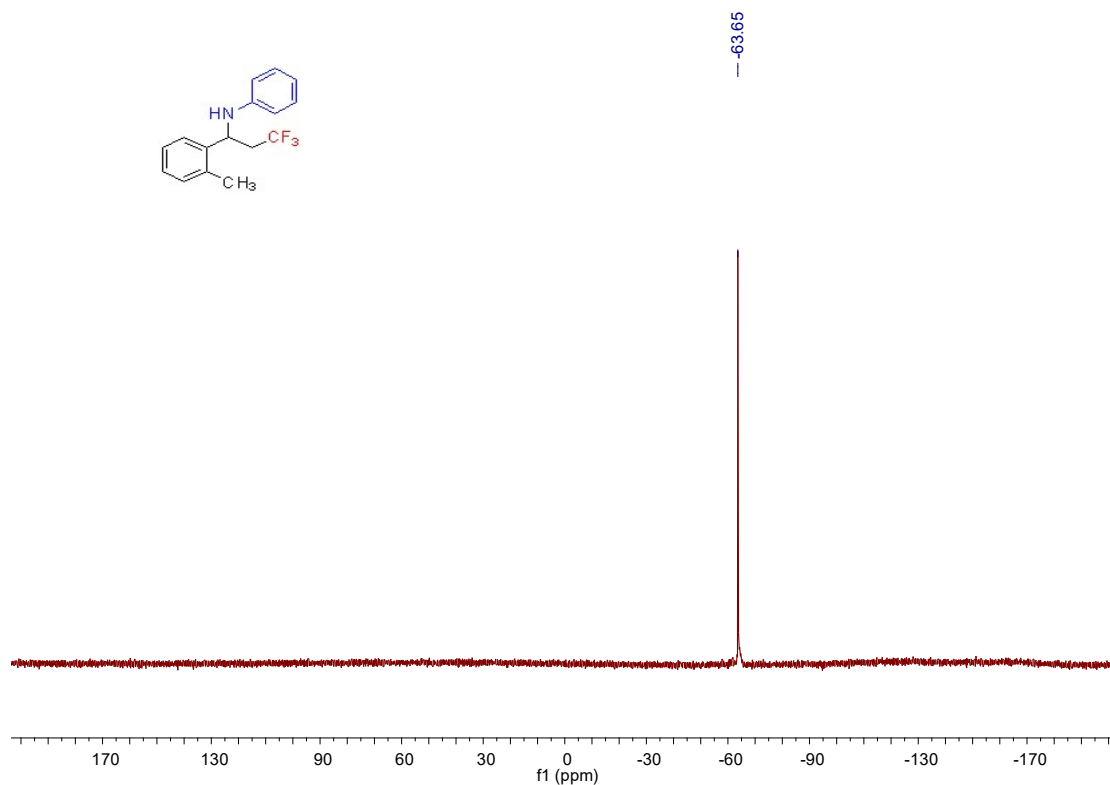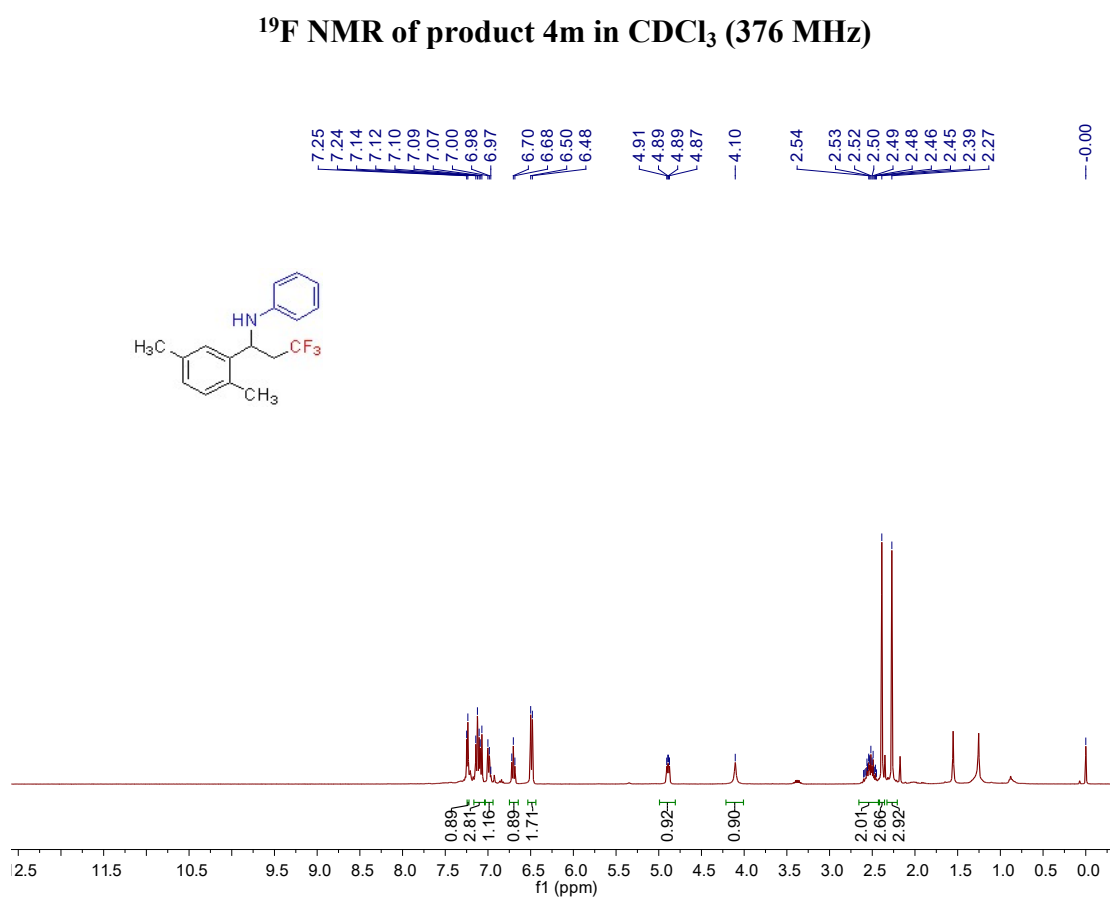



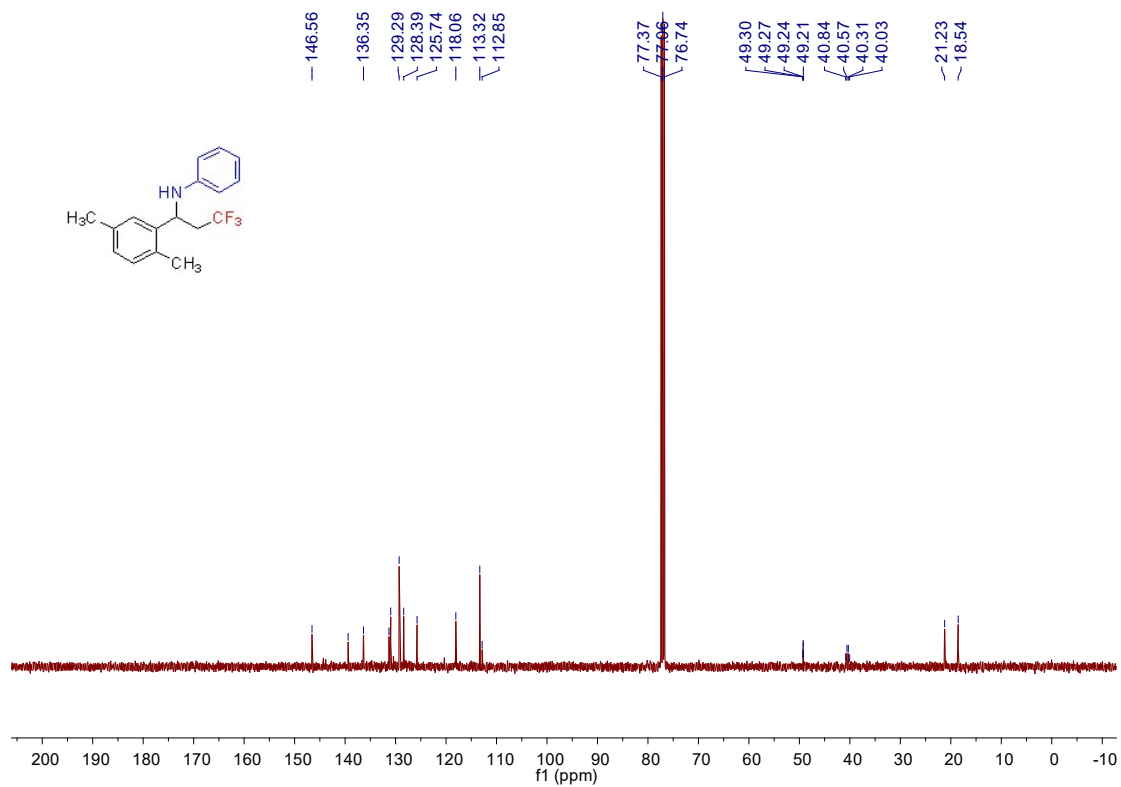

**<sup>13</sup>C NMR of product 4n in CDCl<sub>3</sub> (100 MHz)**

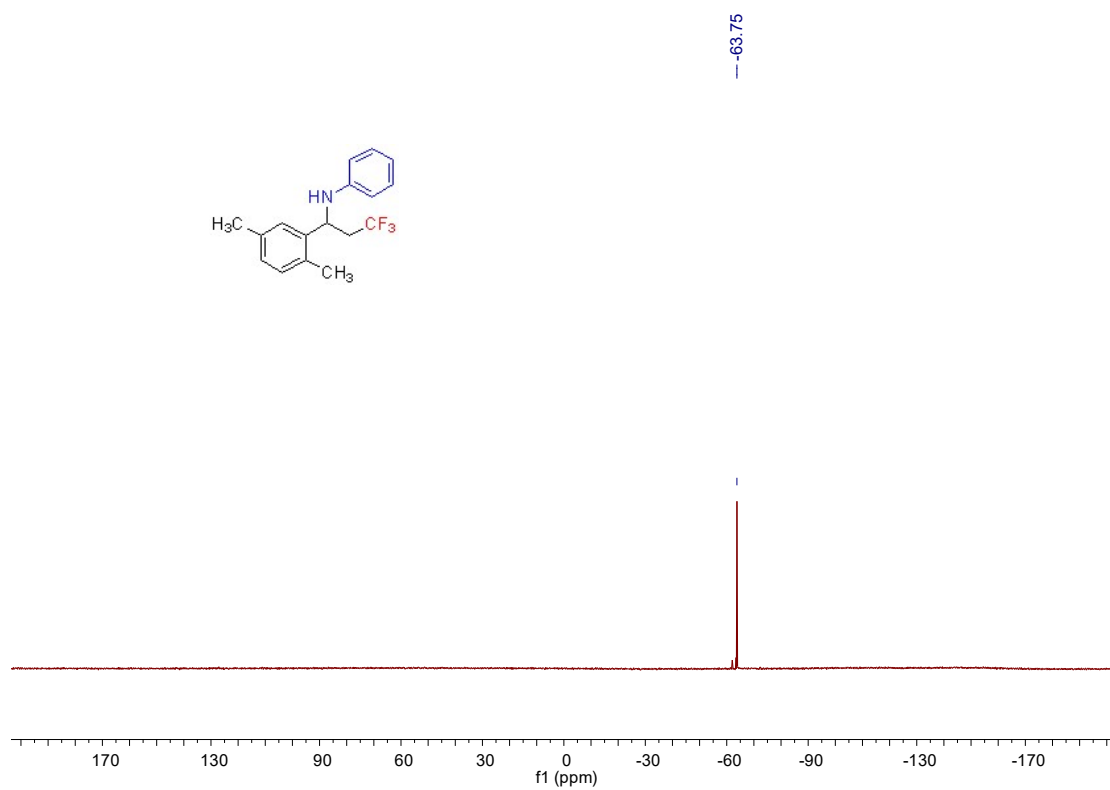

**<sup>19</sup>F NMR of product 4n in CDCl<sub>3</sub> (376 MHz)**

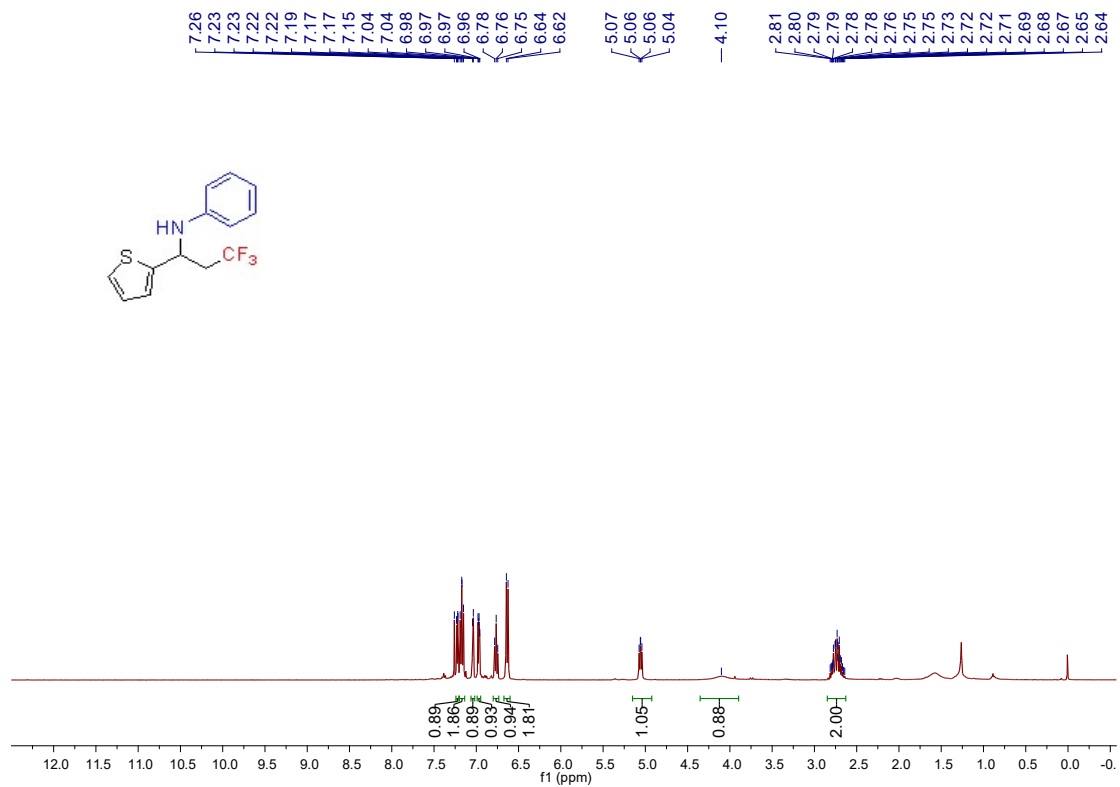

**<sup>1</sup>H NMR of product 4o in CDCl<sub>3</sub> (400 MHz)**

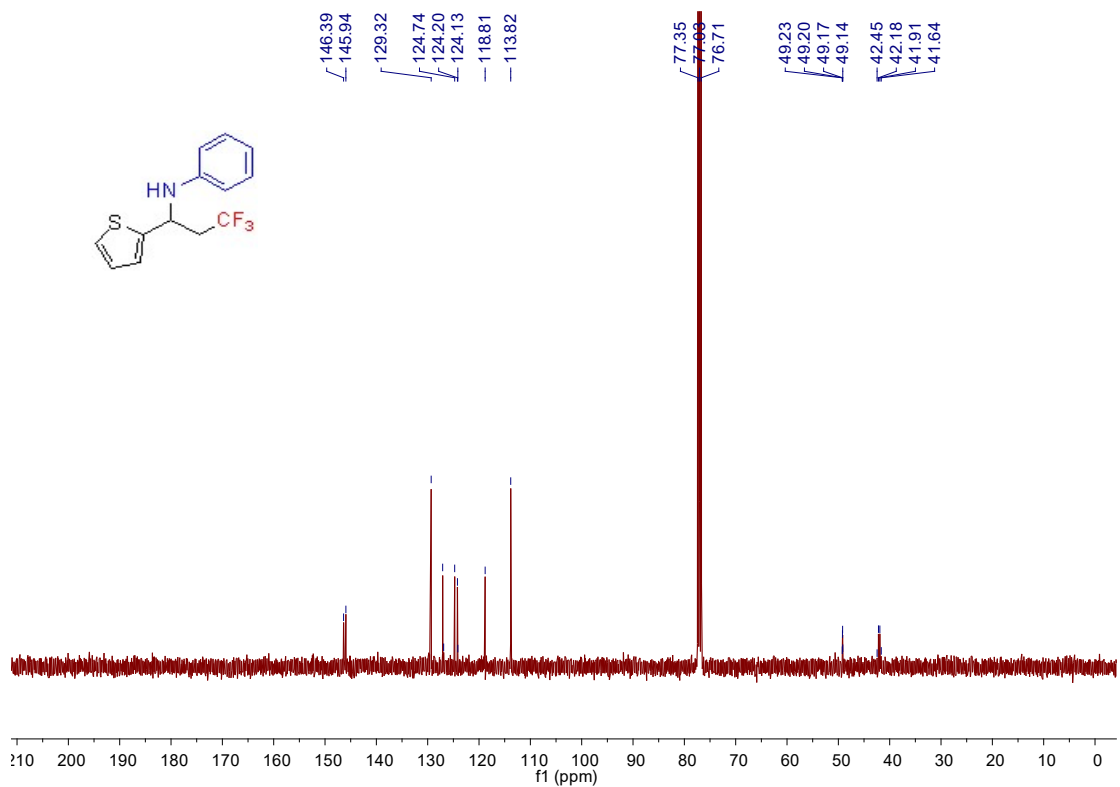

**<sup>13</sup>C NMR of product 4o in CDCl<sub>3</sub> (100 MHz)**

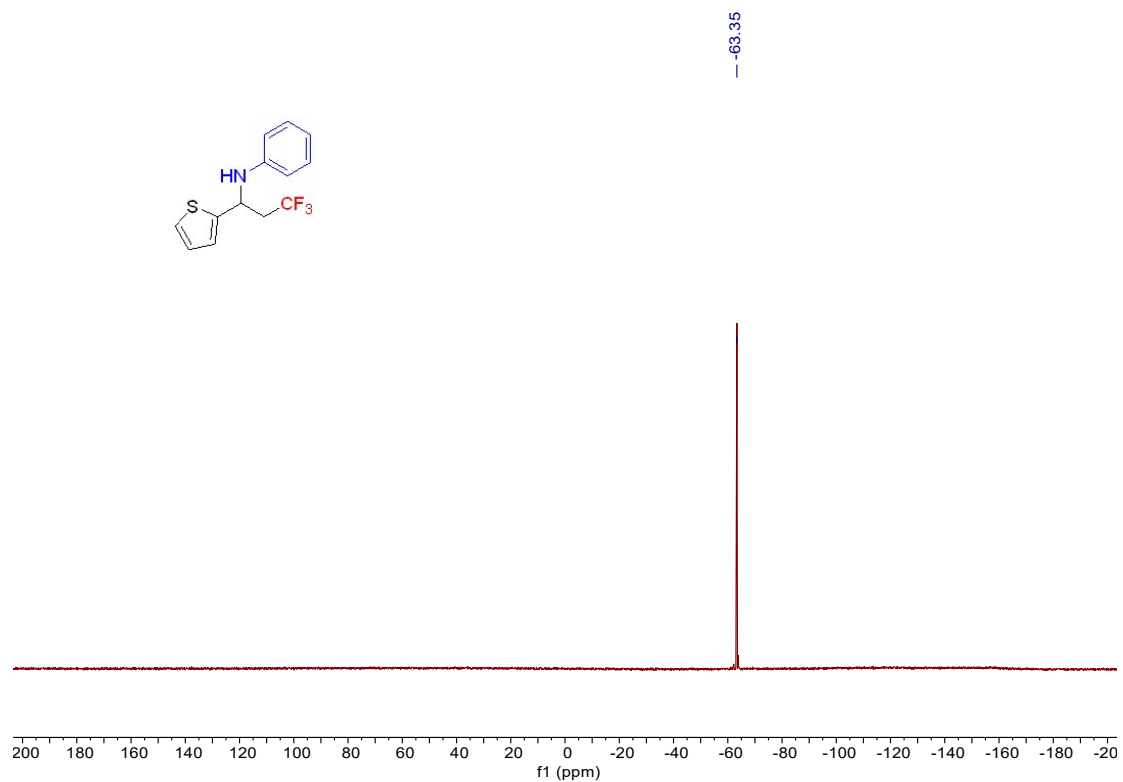

**$^{19}\text{F}$  NMR of product 4o in  $\text{CDCl}_3$  (376 MHz)**

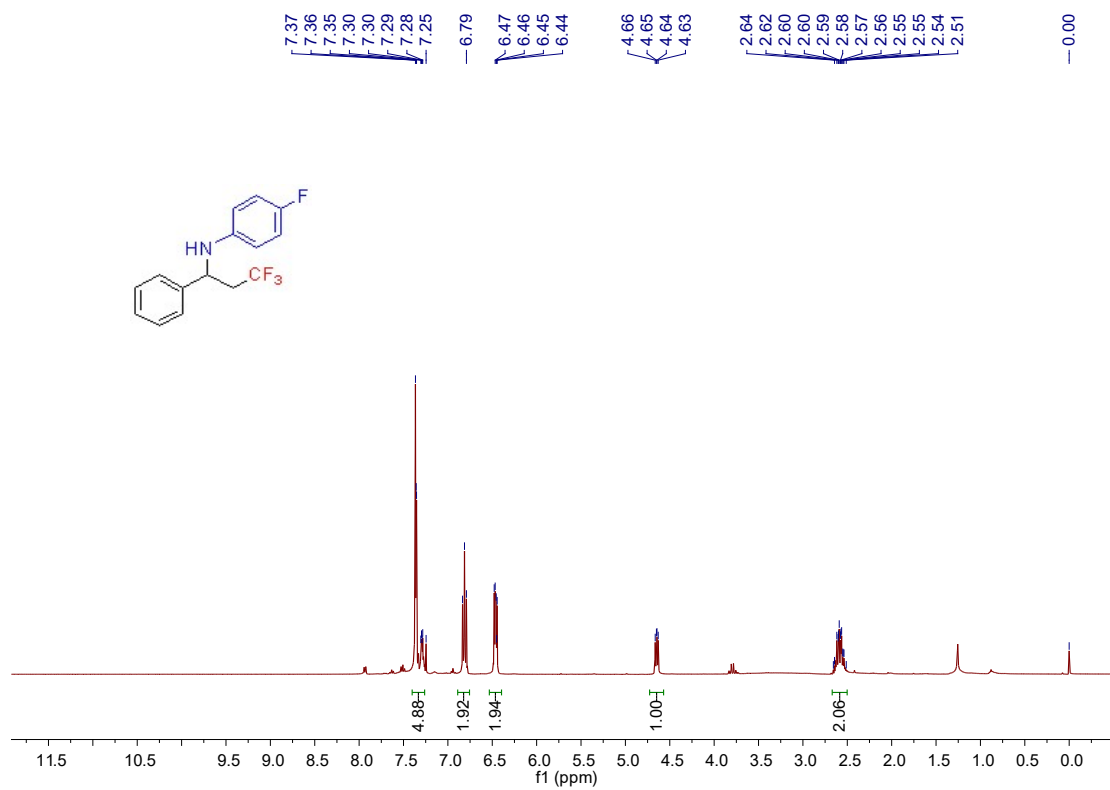

**$^1\text{H}$  NMR of product 5a in  $\text{CDCl}_3$  (400 MHz)**

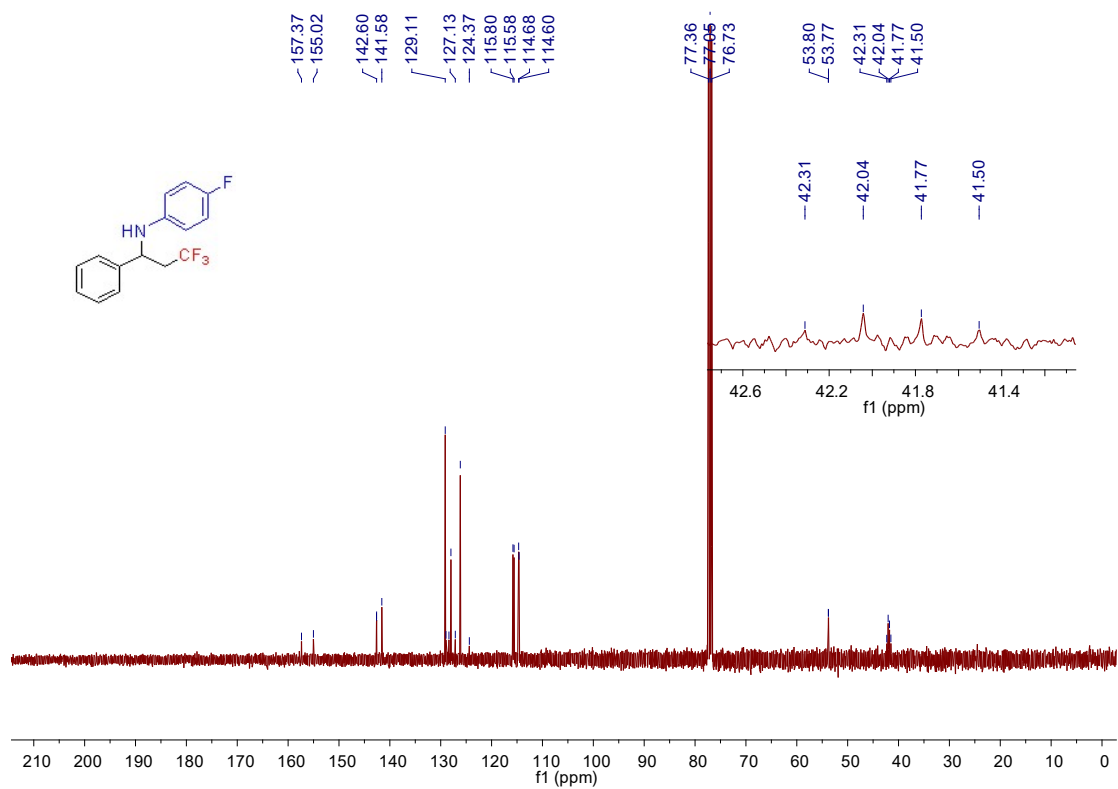

**<sup>13</sup>C NMR of product 5a in CDCl<sub>3</sub> (100 MHz)**

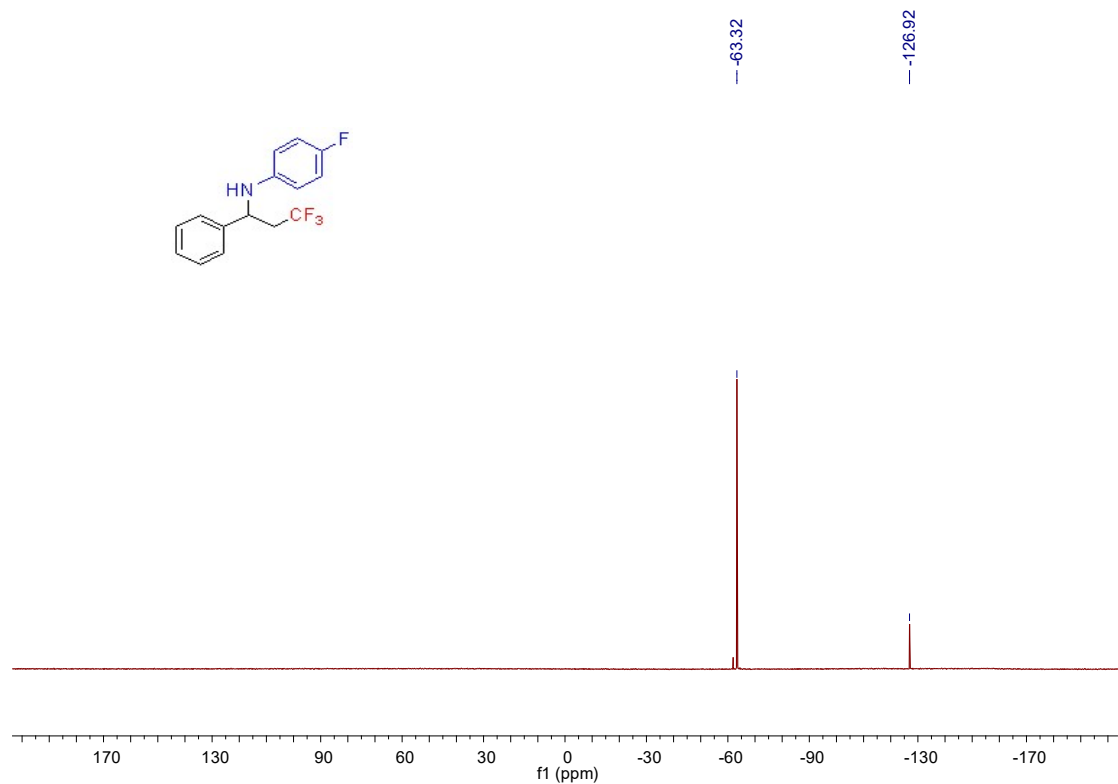

**<sup>19</sup>F NMR of product 5a in CDCl<sub>3</sub> (376 MHz)**

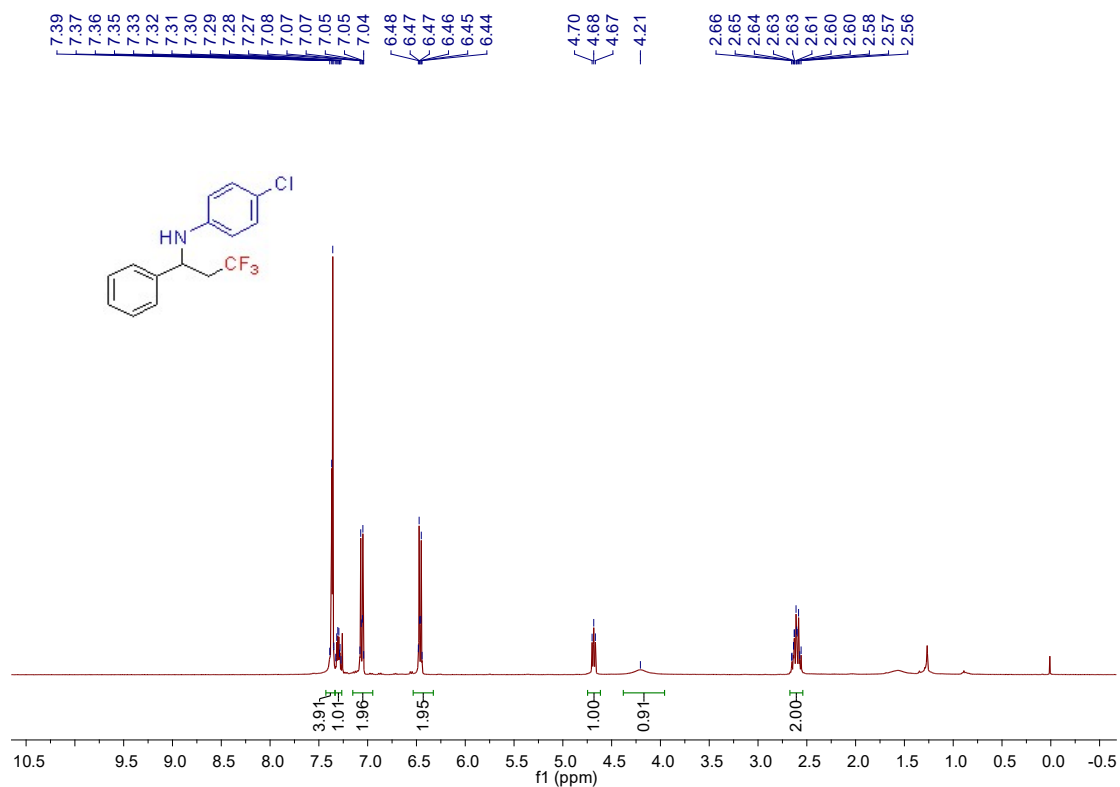

**<sup>1</sup>H NMR of product 5b in CDCl<sub>3</sub> (400 MHz)**

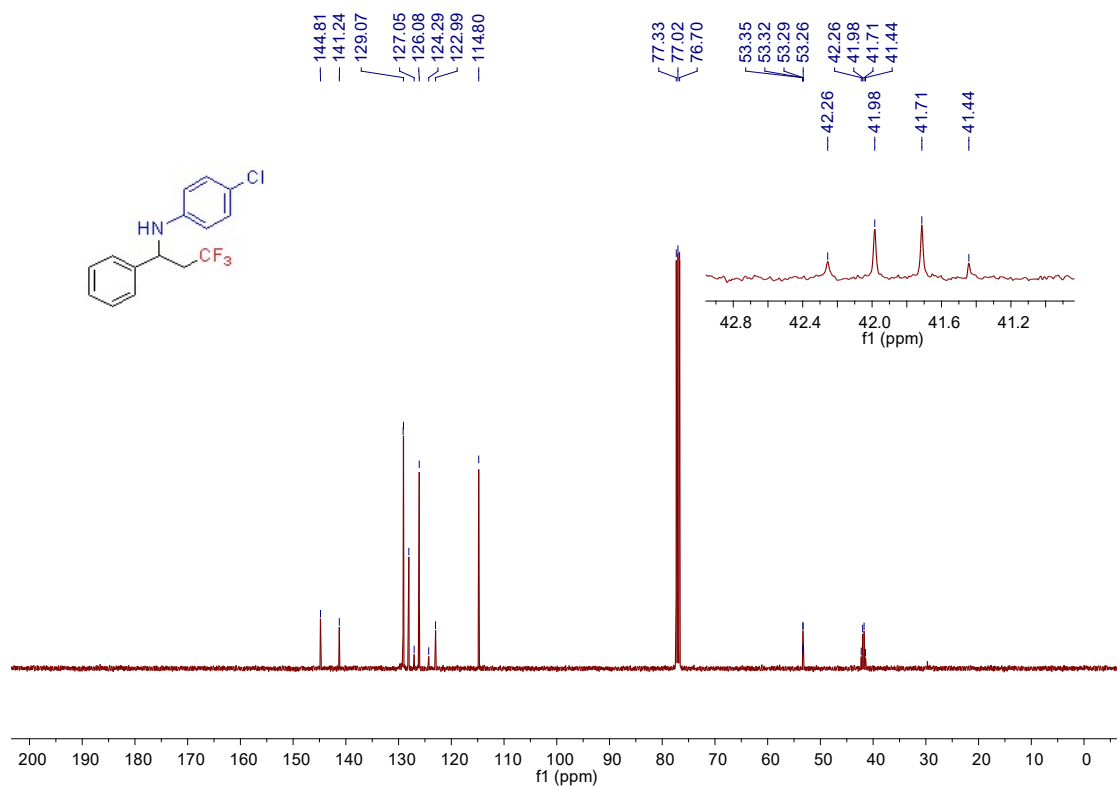

**<sup>13</sup>C NMR of product 5b in CDCl<sub>3</sub> (100 MHz)**

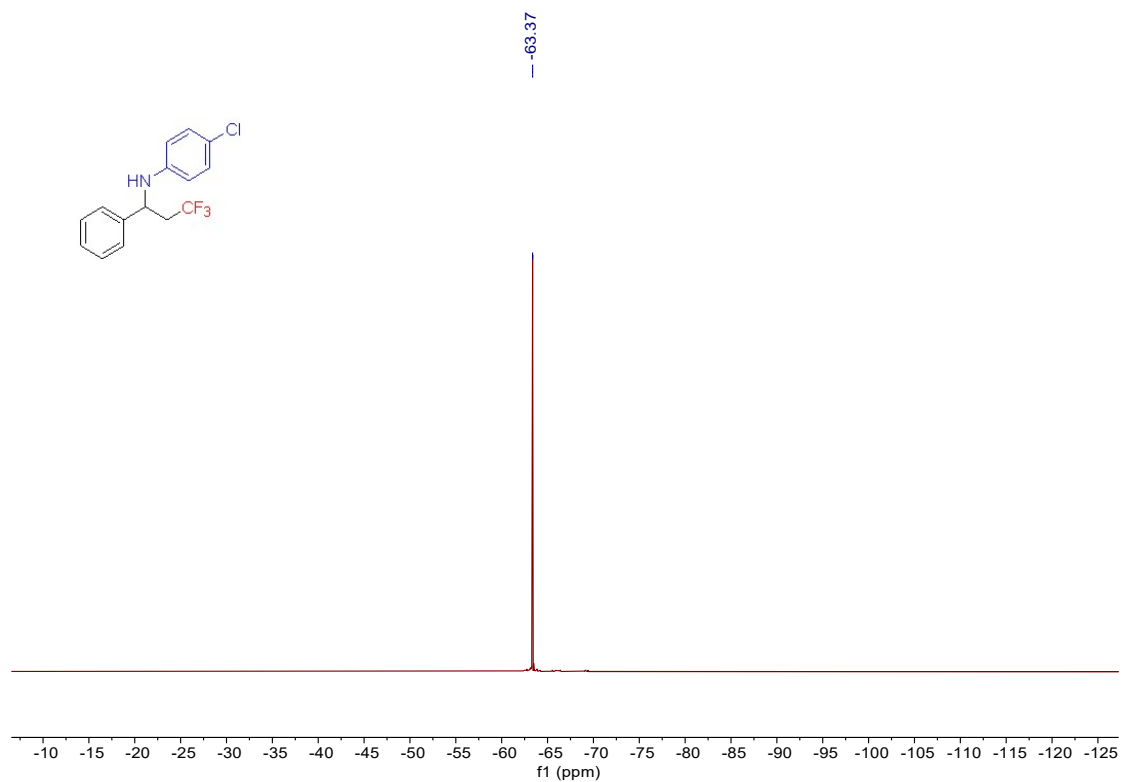

**$^{19}\text{F}$  NMR of product 5b in  $\text{CDCl}_3$  (376 MHz)**

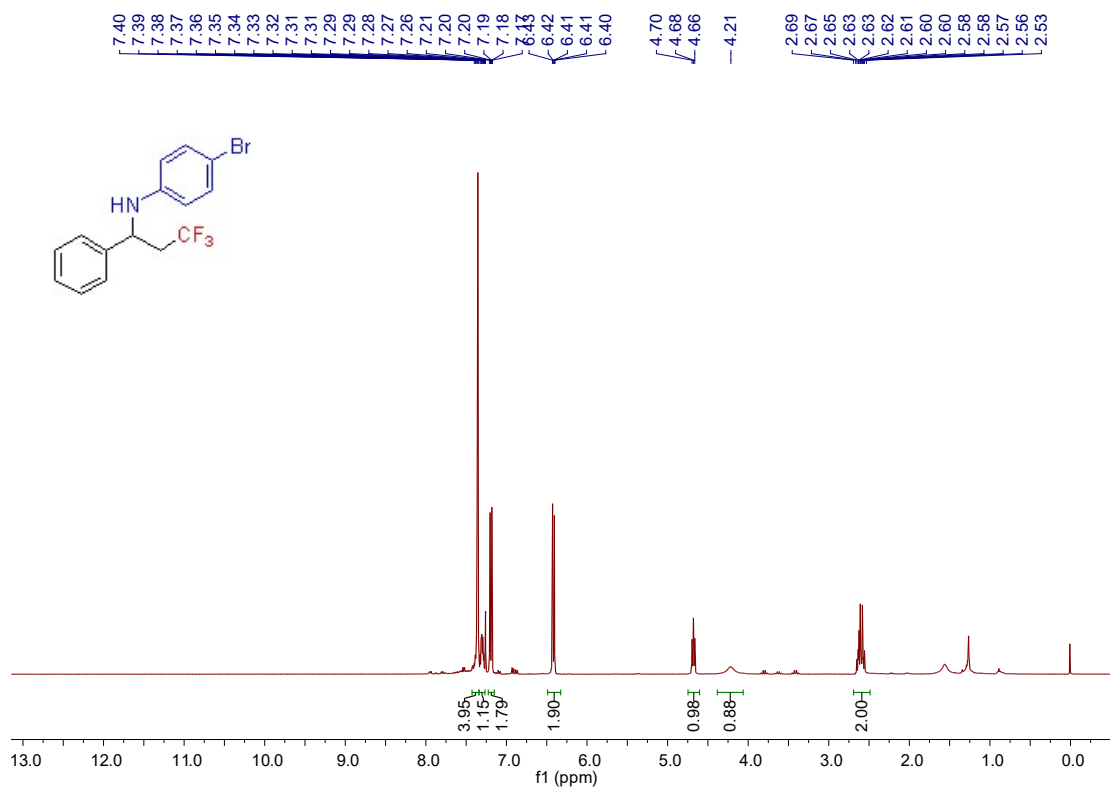

**$^1\text{H}$  NMR of product 5c in  $\text{CDCl}_3$  (400 MHz)**

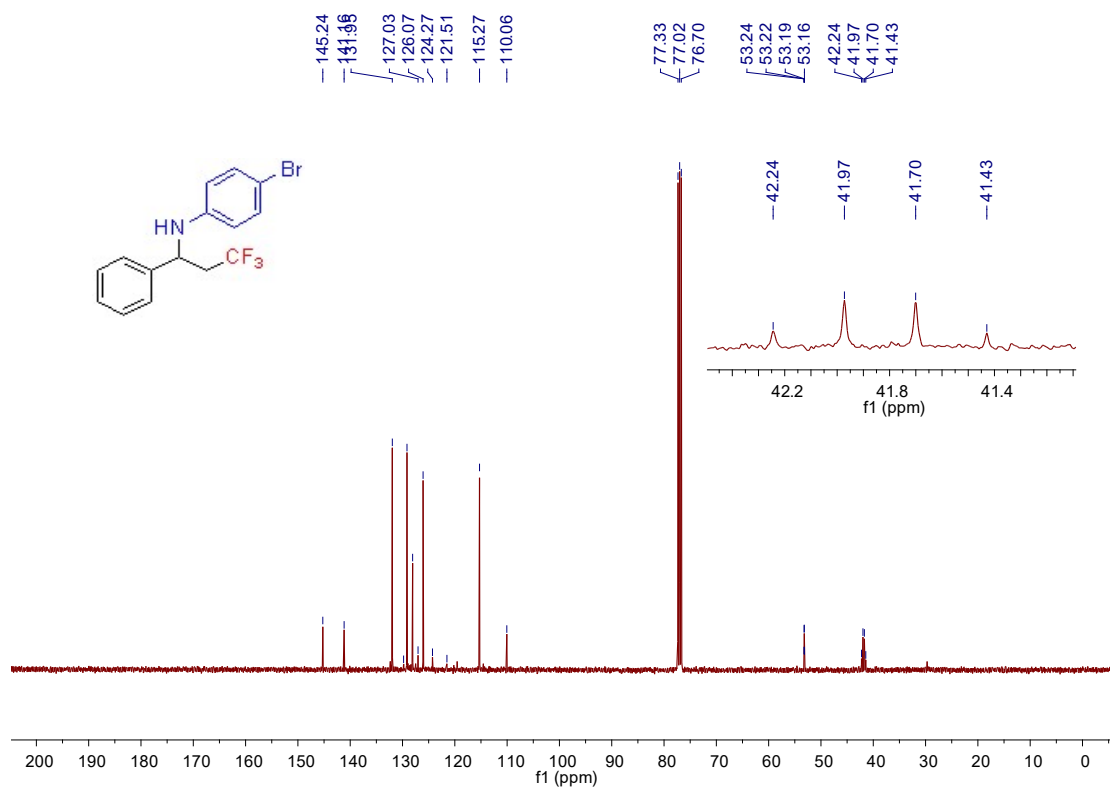

<sup>13</sup>C NMR of product 5c in CDCl<sub>3</sub> (100 MHz)

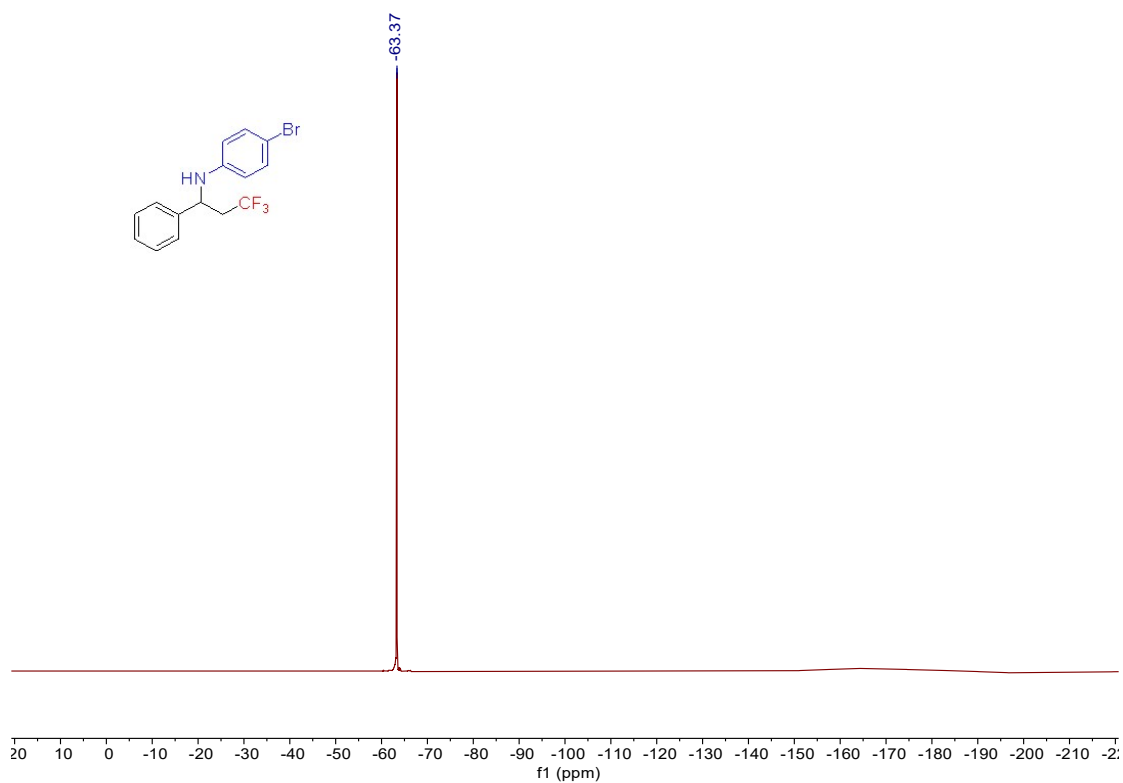

<sup>19</sup>F NMR of product 5c in CDCl<sub>3</sub> (376 MHz)

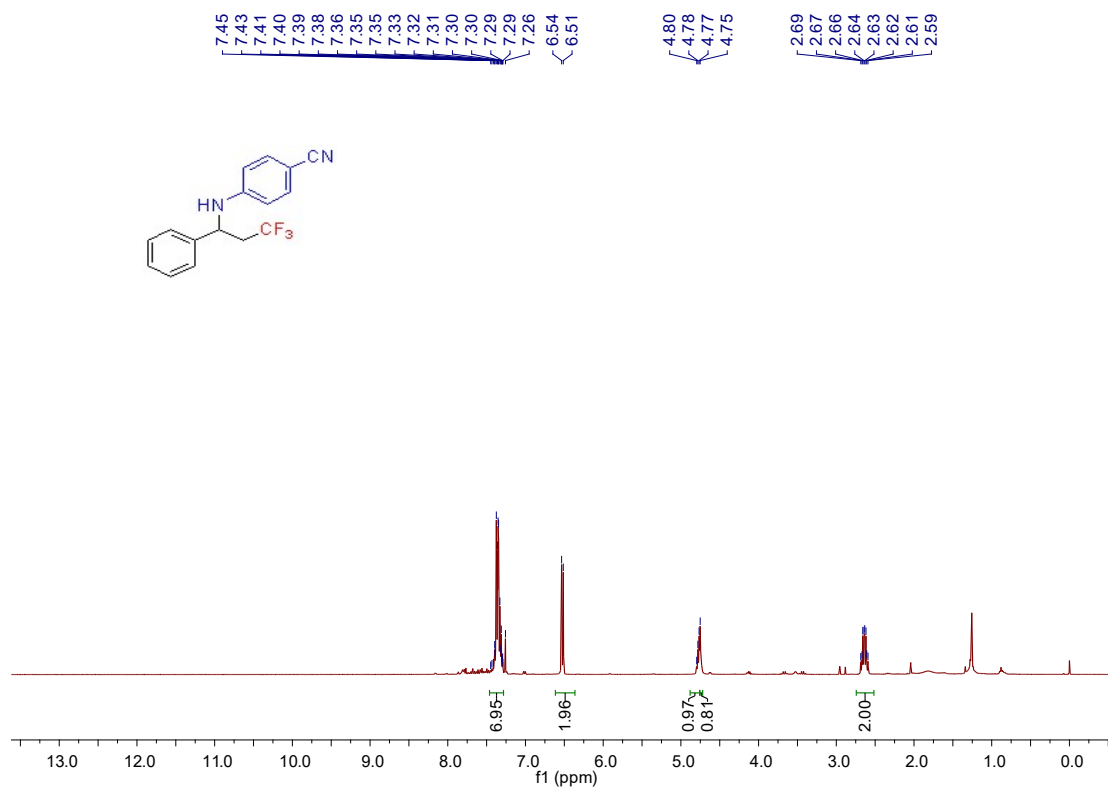

**<sup>1</sup>H NMR of product 5d in CDCl<sub>3</sub> (400 MHz)**

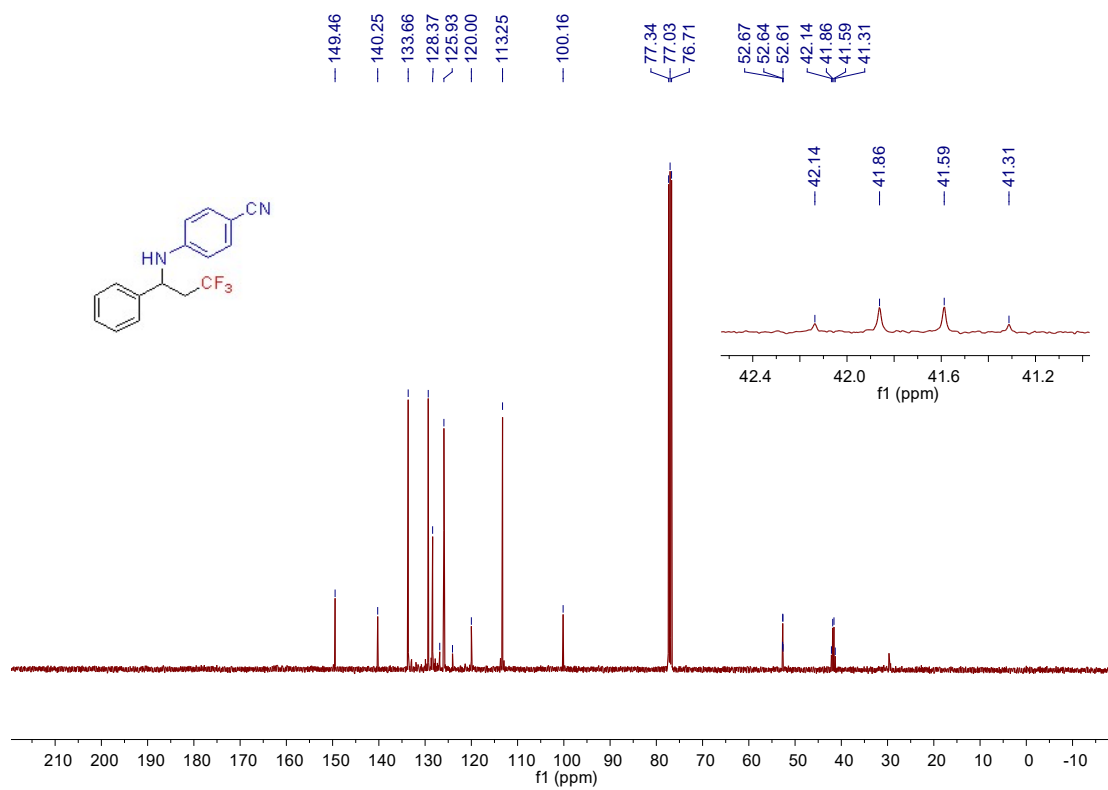

**<sup>13</sup>C NMR of product 5d in CDCl<sub>3</sub> (100 MHz)**



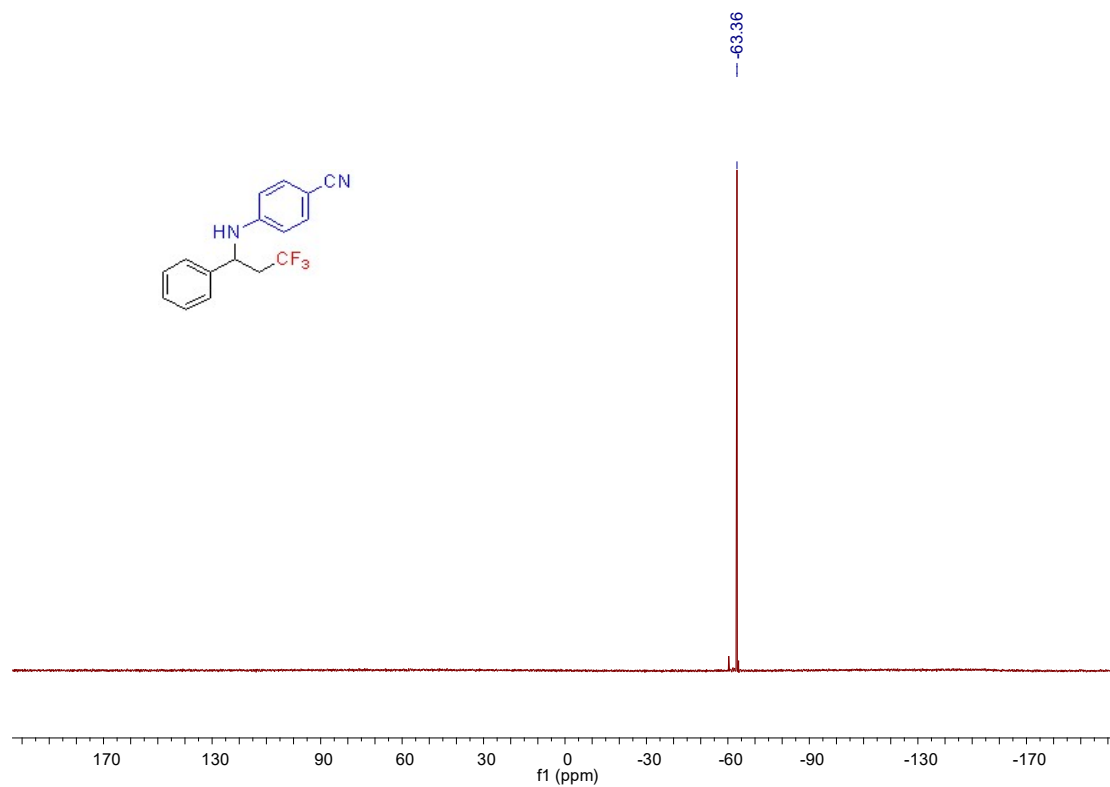

**$^{19}\text{F}$  NMR of product 5d in  $\text{CDCl}_3$  (376 MHz)**

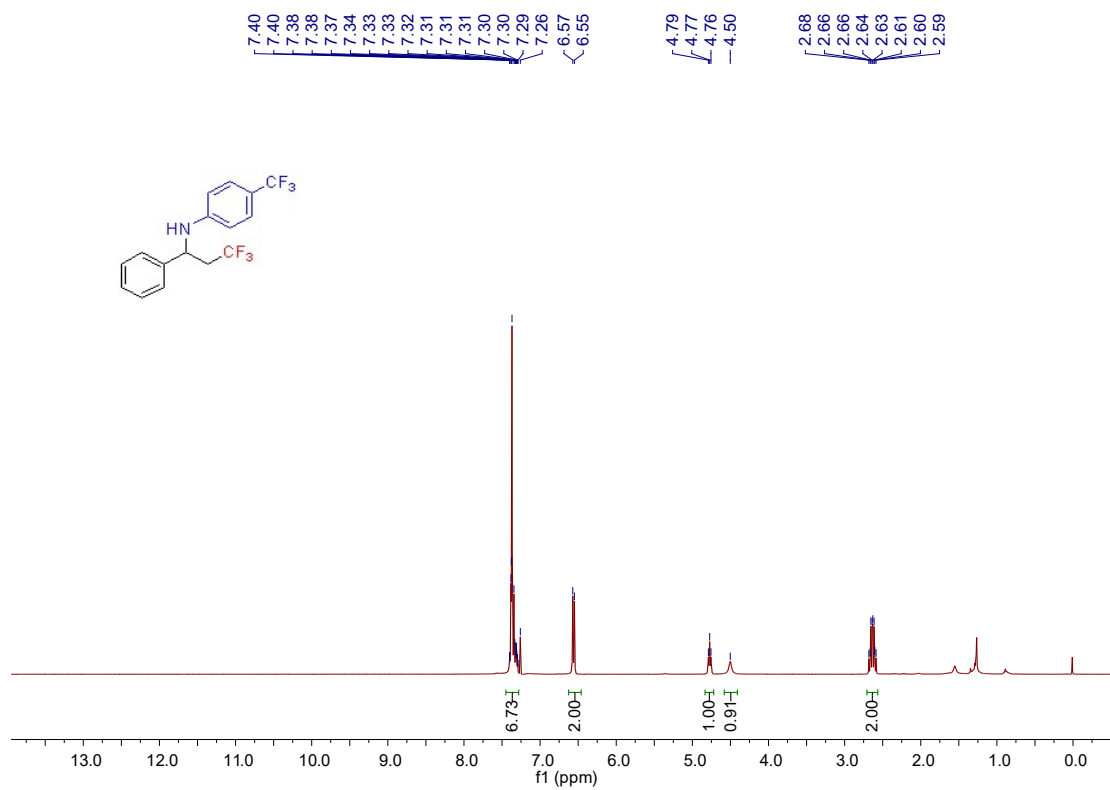

**$^1\text{H}$  NMR of product 5e in  $\text{CDCl}_3$  (400 MHz)**

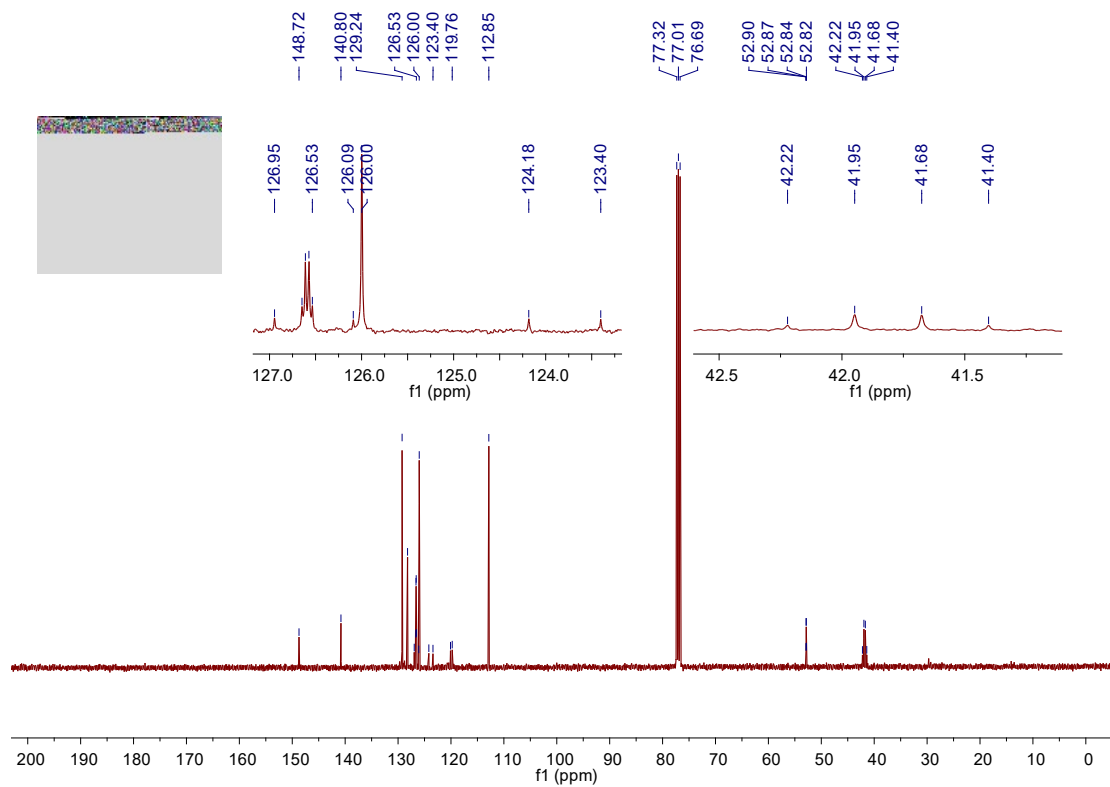

**<sup>13</sup>C NMR of product 5e in CDCl<sub>3</sub> (100 MHz)**

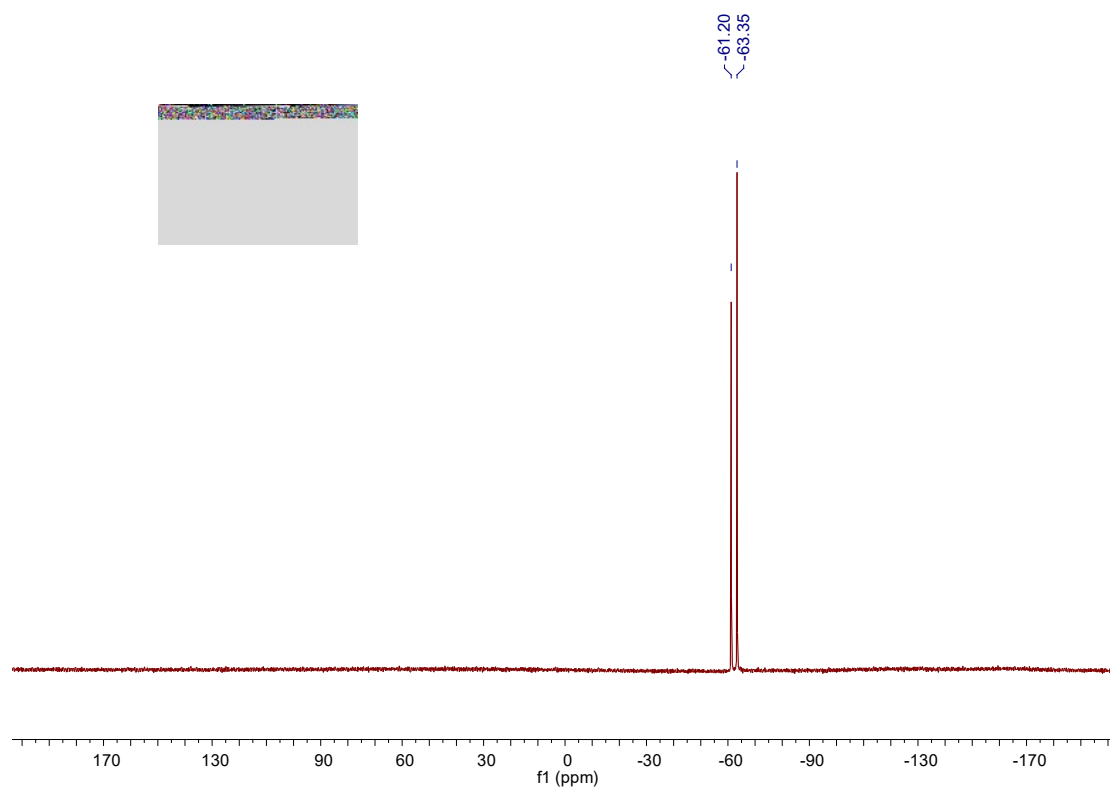

**<sup>19</sup>F NMR of product 5e in CDCl<sub>3</sub> (376 MHz)**

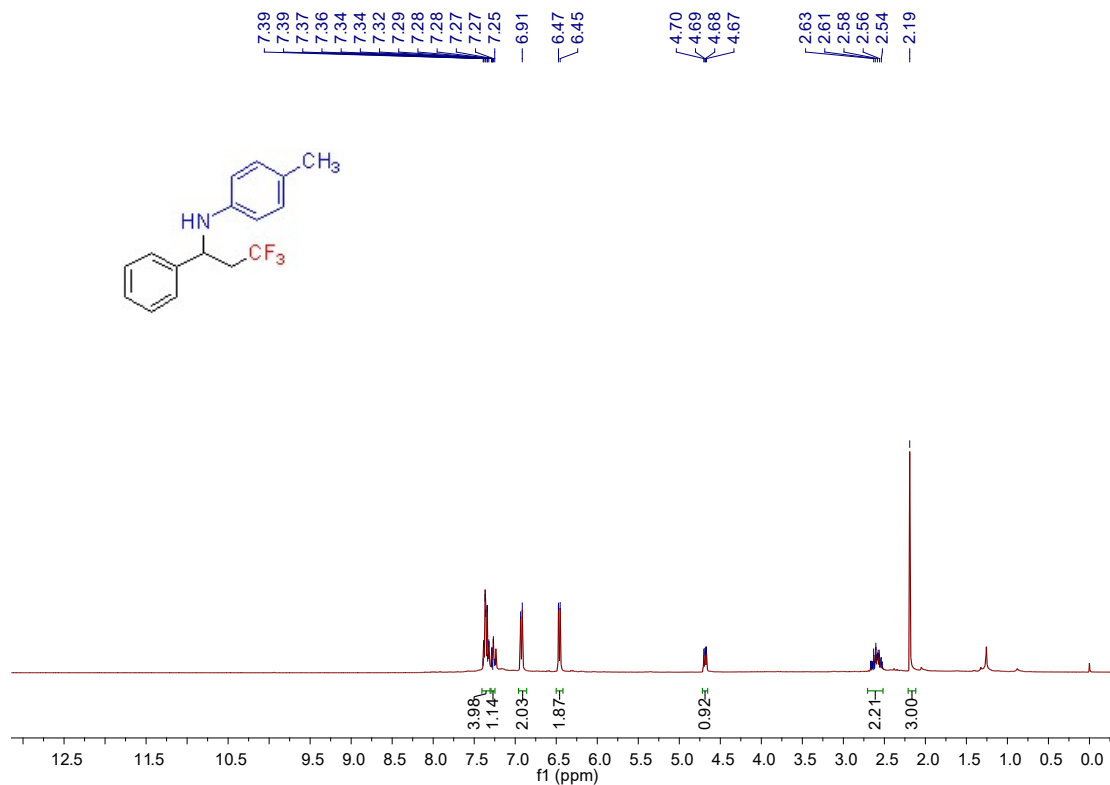

**<sup>1</sup>H NMR of product 5f in CDCl<sub>3</sub> (400 MHz)**

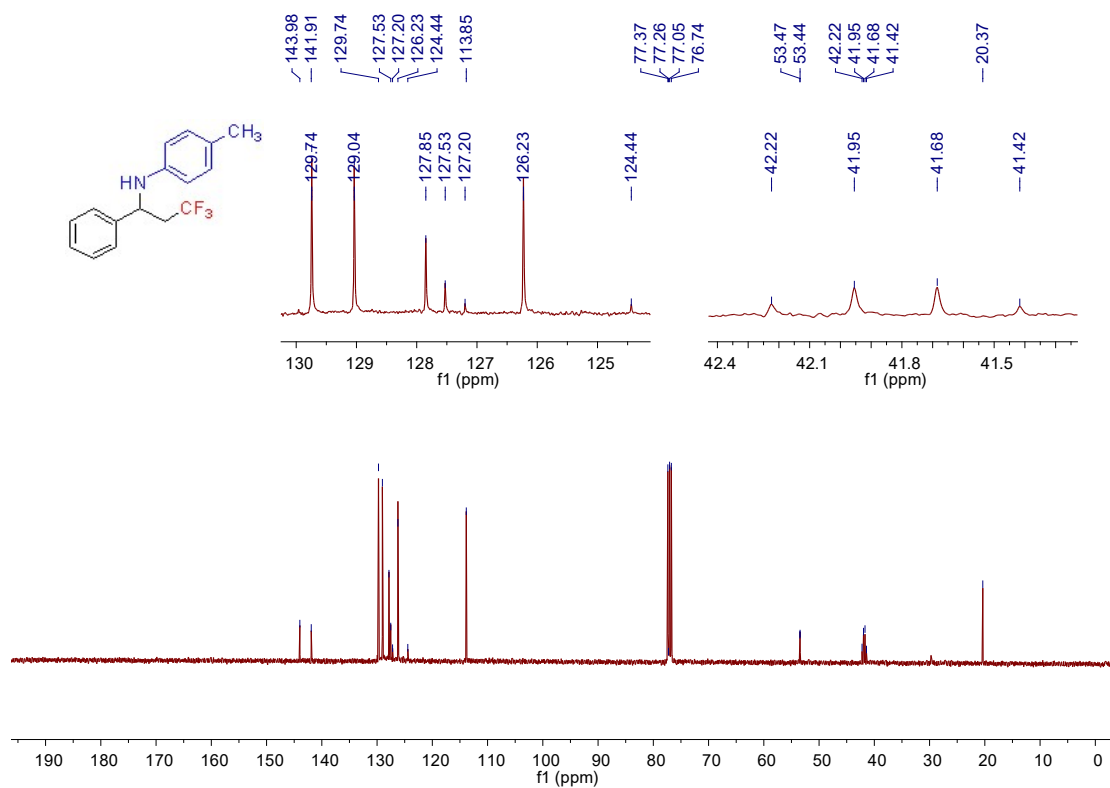

**<sup>13</sup>C NMR of product 5f in CDCl<sub>3</sub> (100 MHz)**

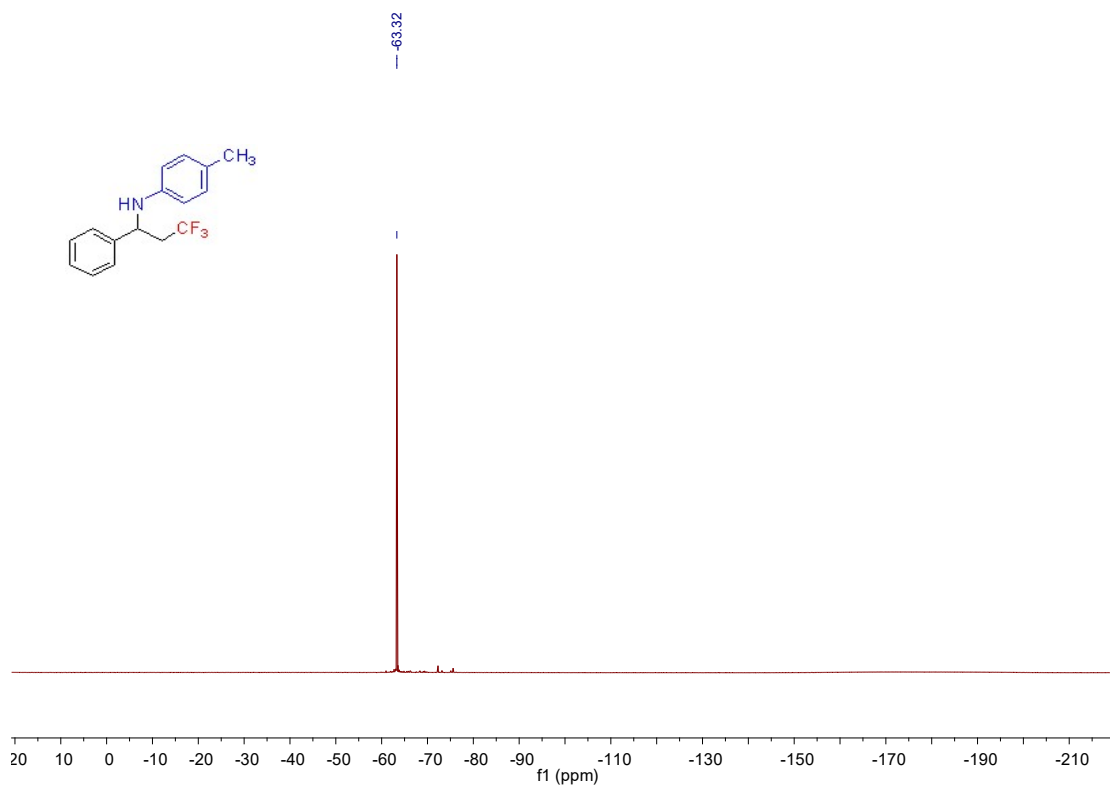

$^{19}\text{F}$  NMR of product 5f in  $\text{CDCl}_3$  (376 MHz)

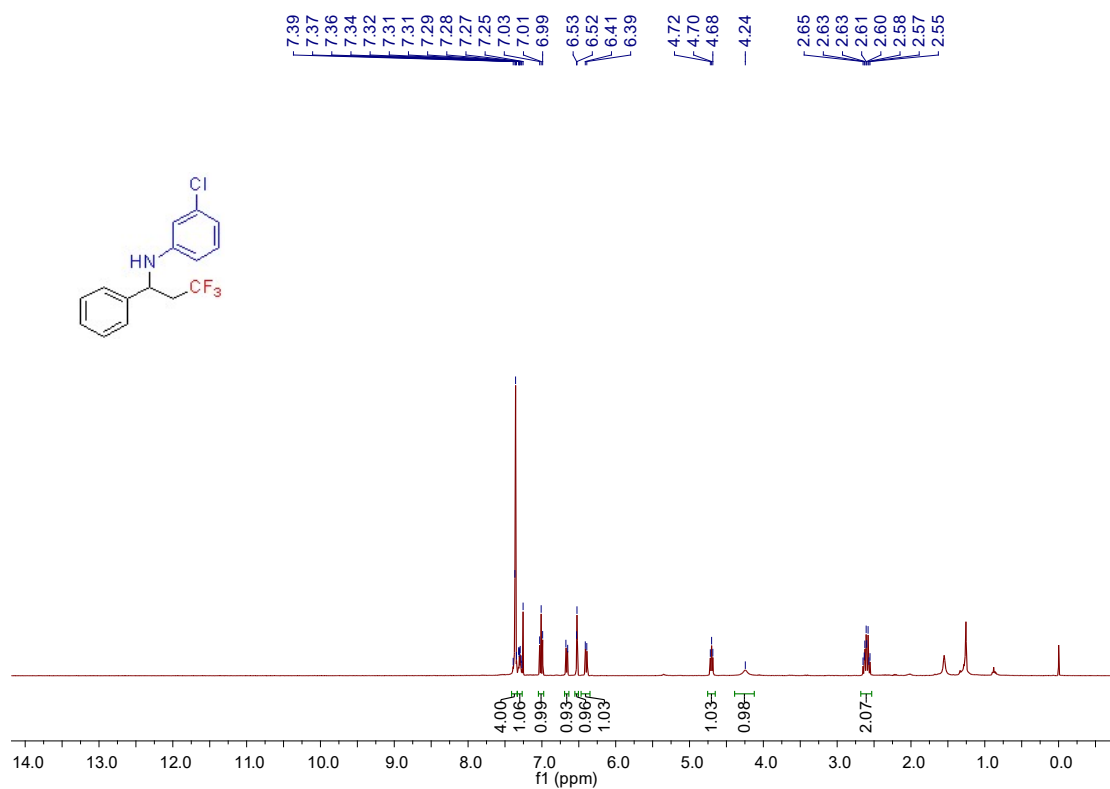

$^1\text{H}$  NMR of product 5g in  $\text{CDCl}_3$  (400 MHz)

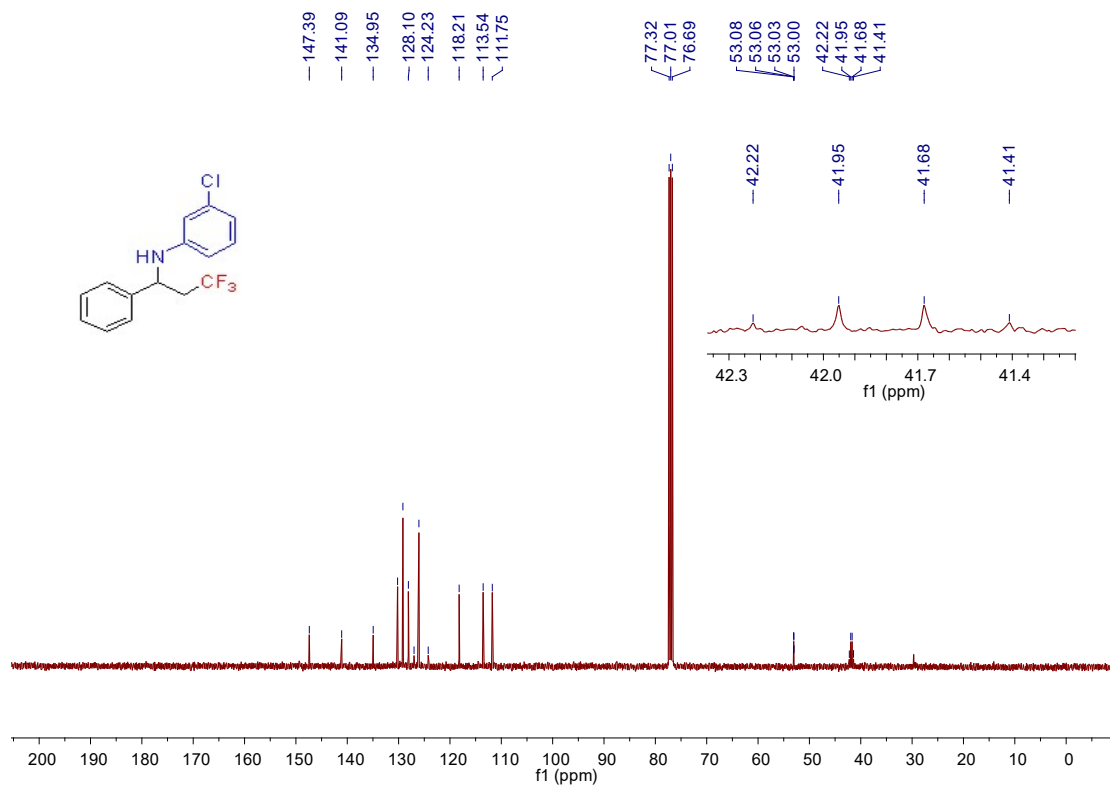

<sup>13</sup>C NMR of product 5g in CDCl<sub>3</sub> (100 MHz)

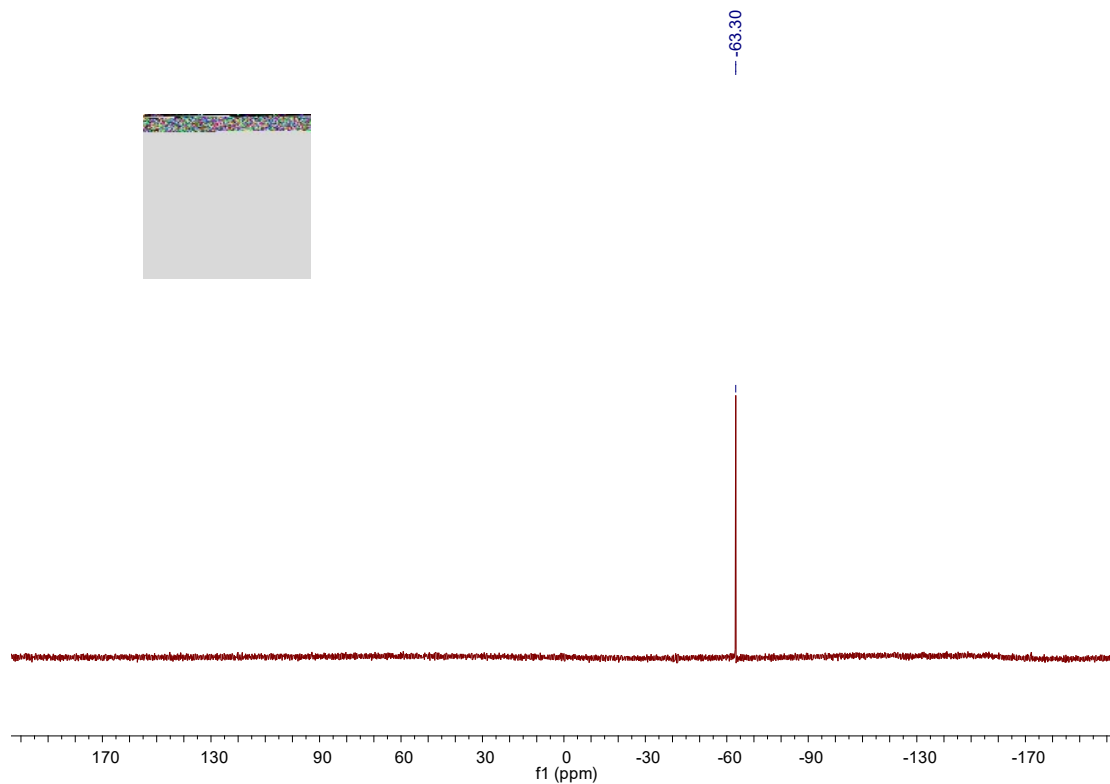

<sup>19</sup>F NMR of product 5g in CDCl<sub>3</sub> (376 MHz)

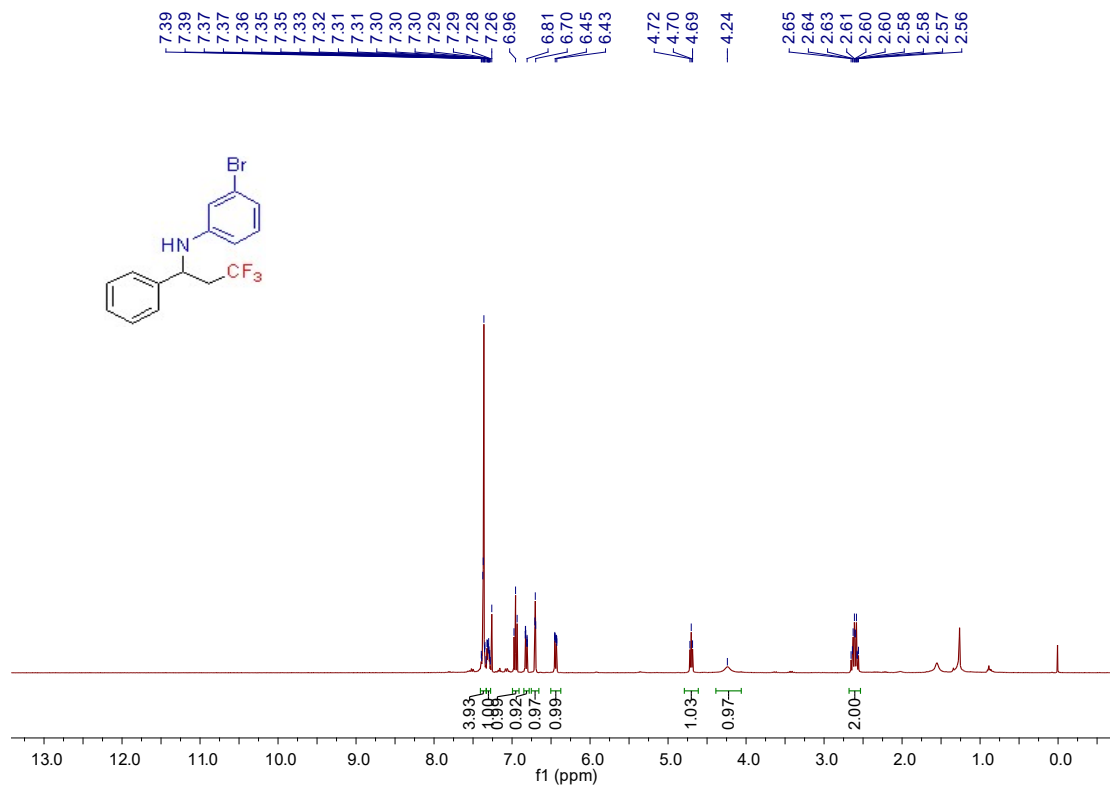

**<sup>1</sup>H NMR of product 5h in CDCl<sub>3</sub> (400 MHz)**

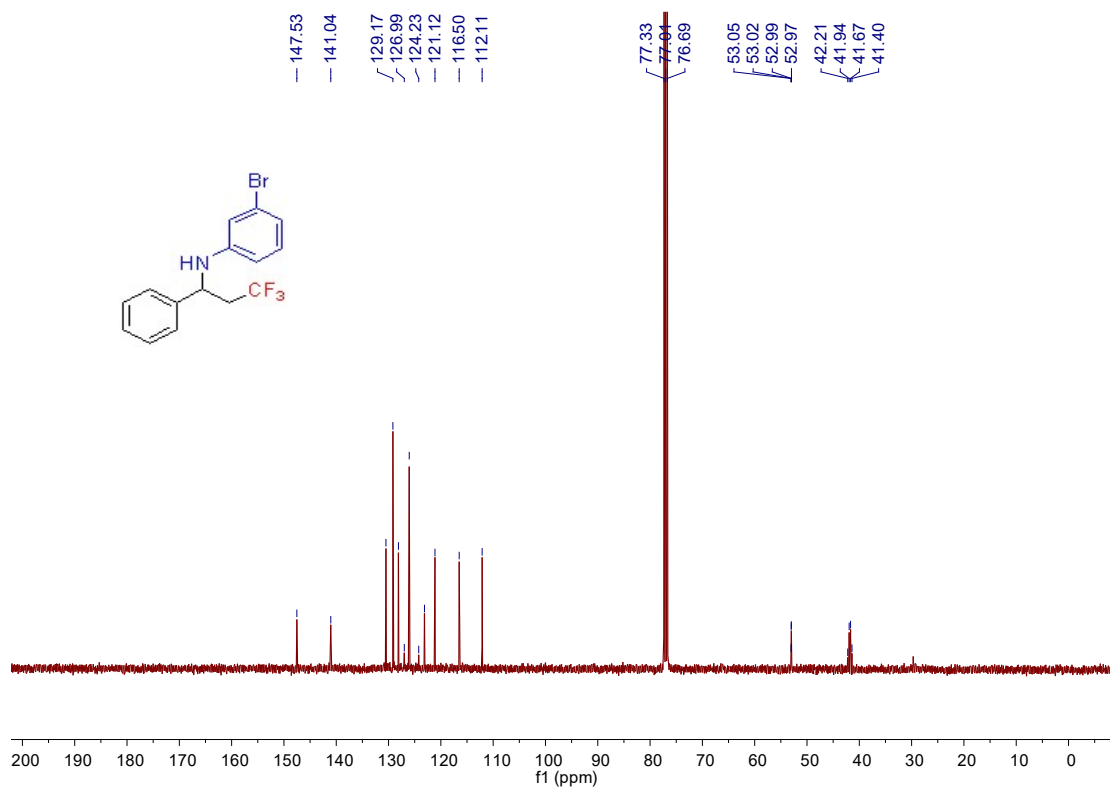

**<sup>13</sup>C NMR of product 5h in CDCl<sub>3</sub> (100 MHz)**

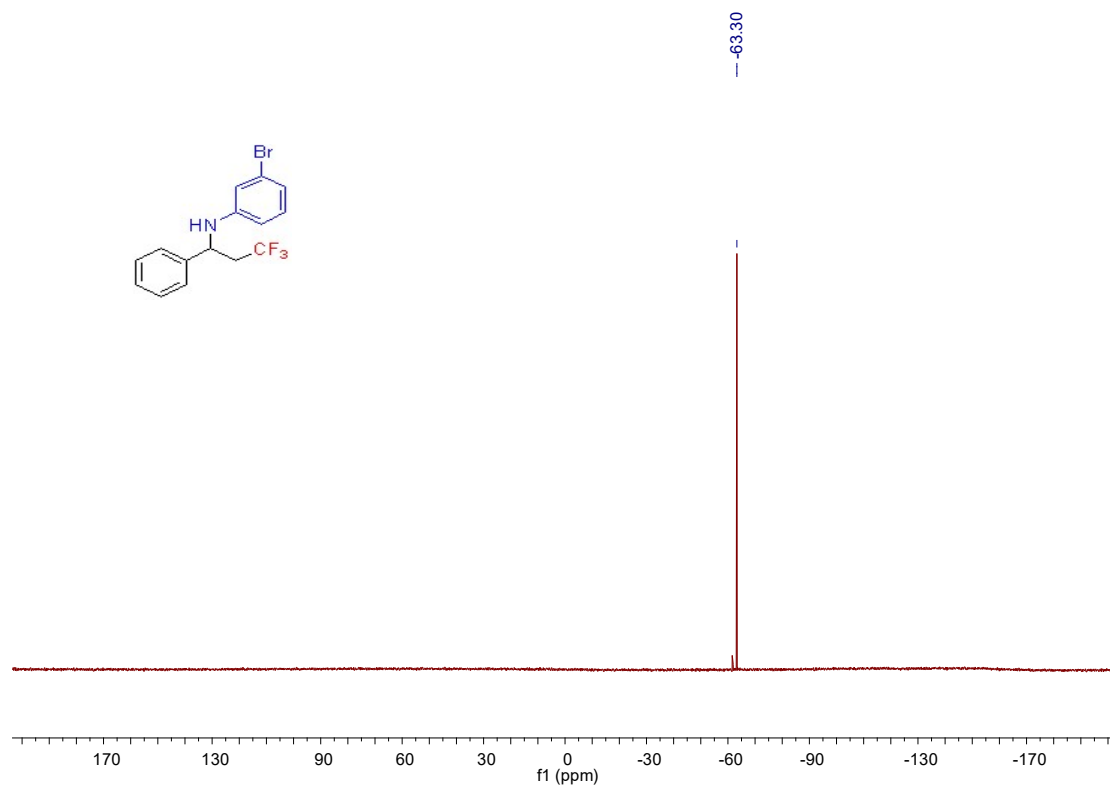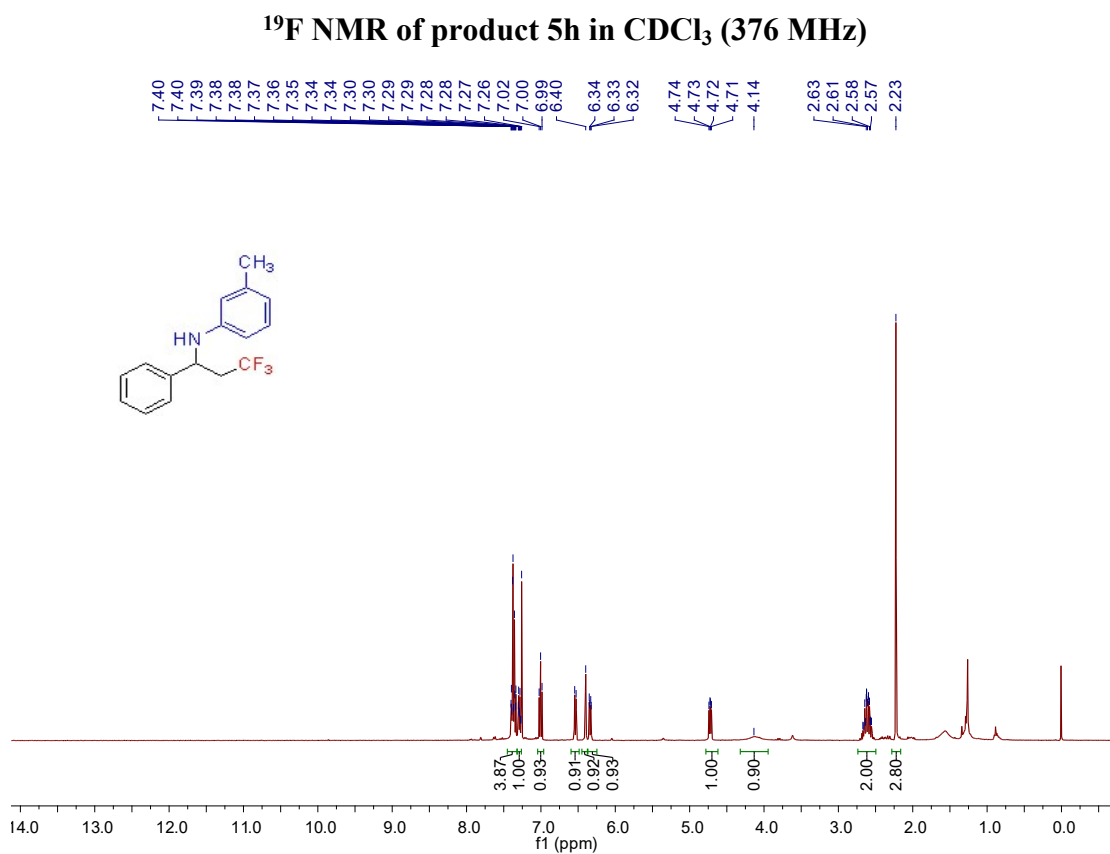

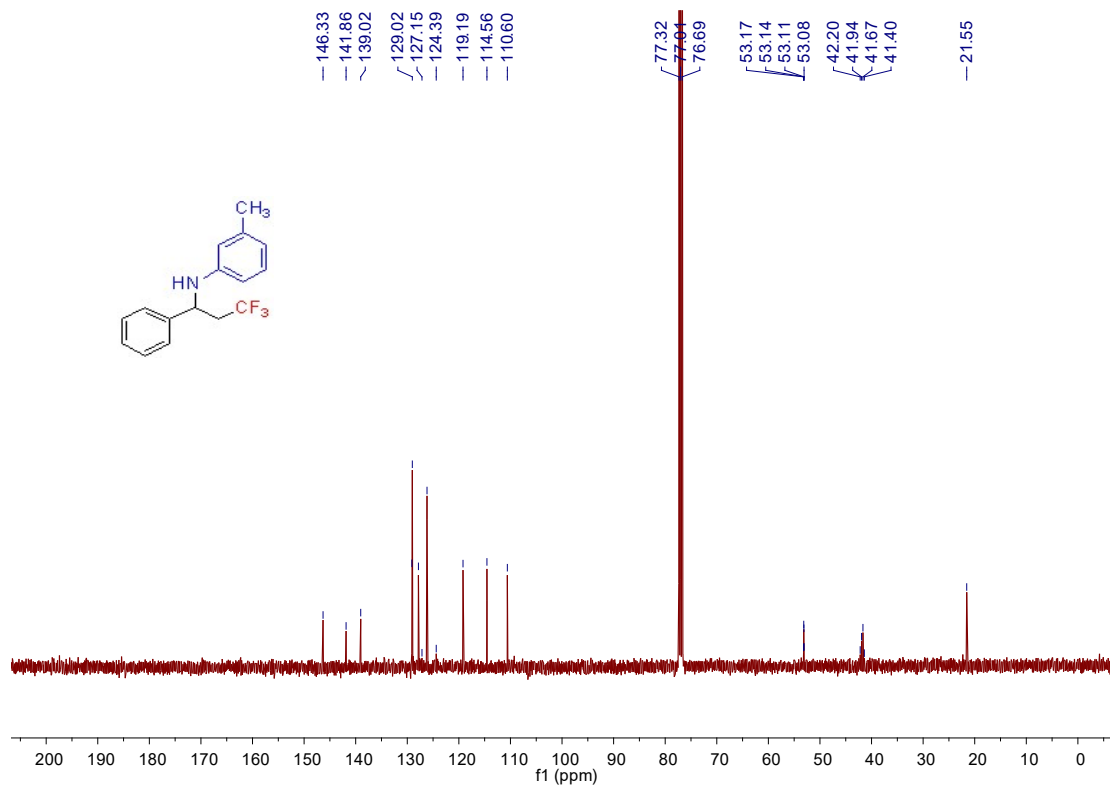

**<sup>13</sup>C NMR of product 5i in CDCl<sub>3</sub> (100 MHz)**

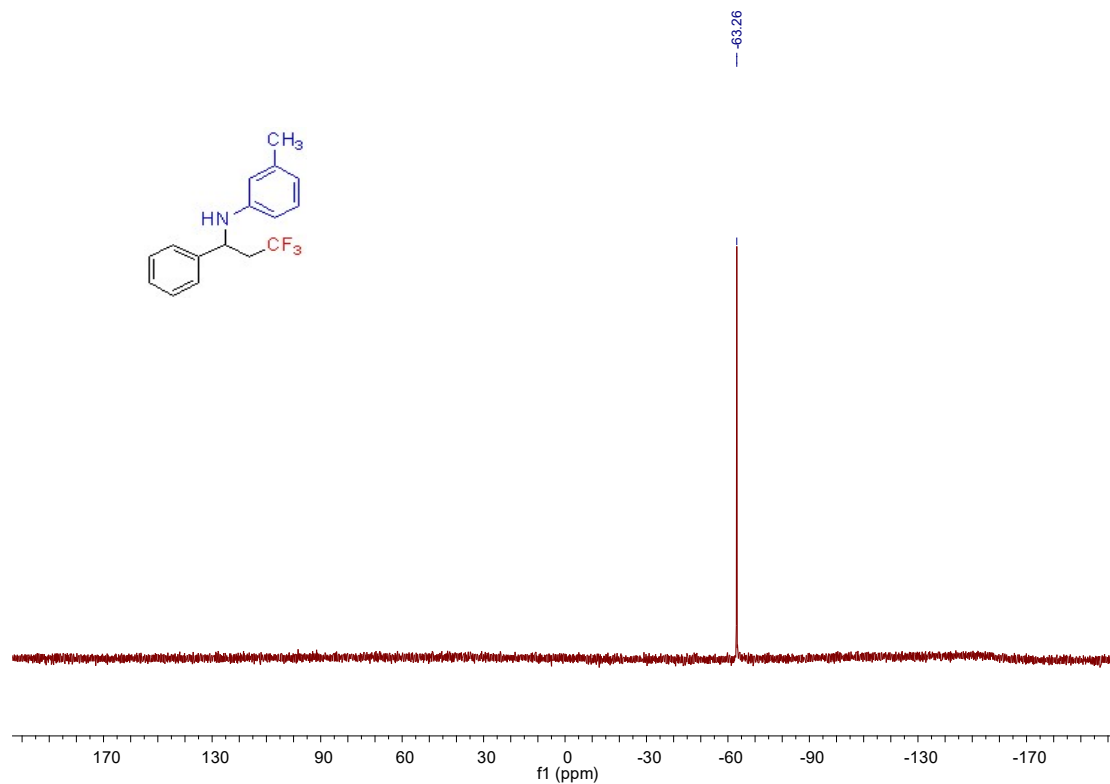

**<sup>19</sup>F NMR of product 5i in CDCl<sub>3</sub> (376 MHz)**



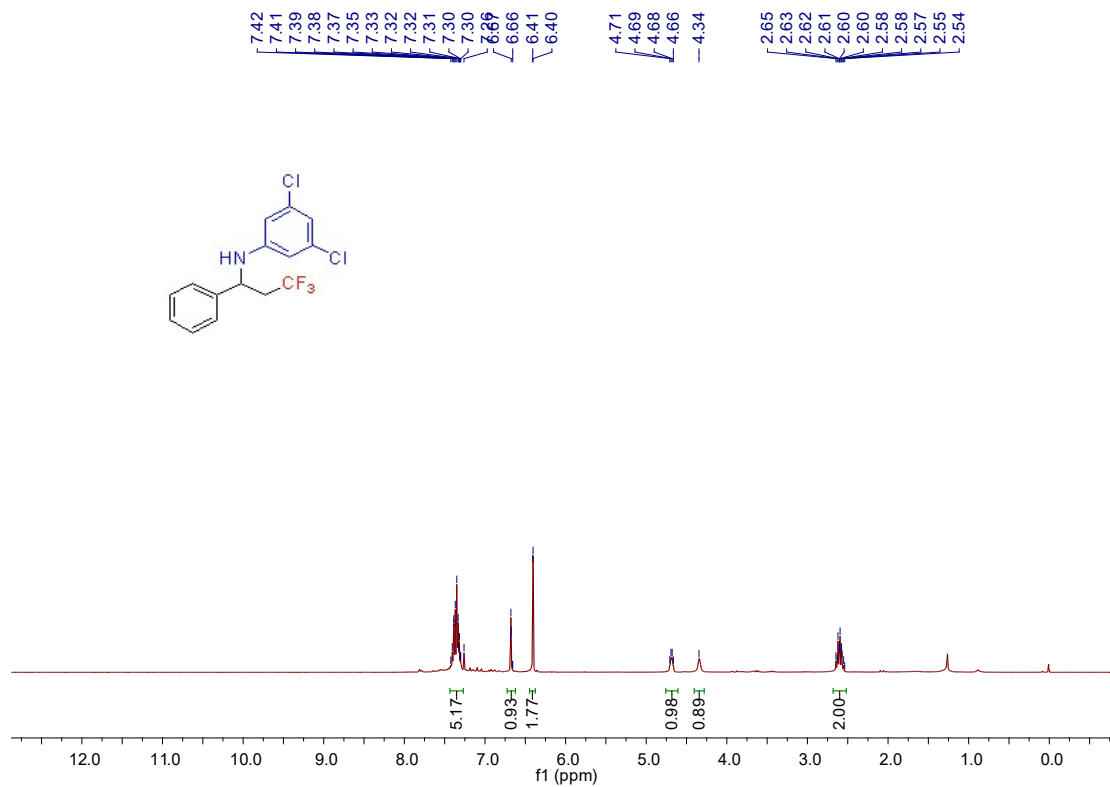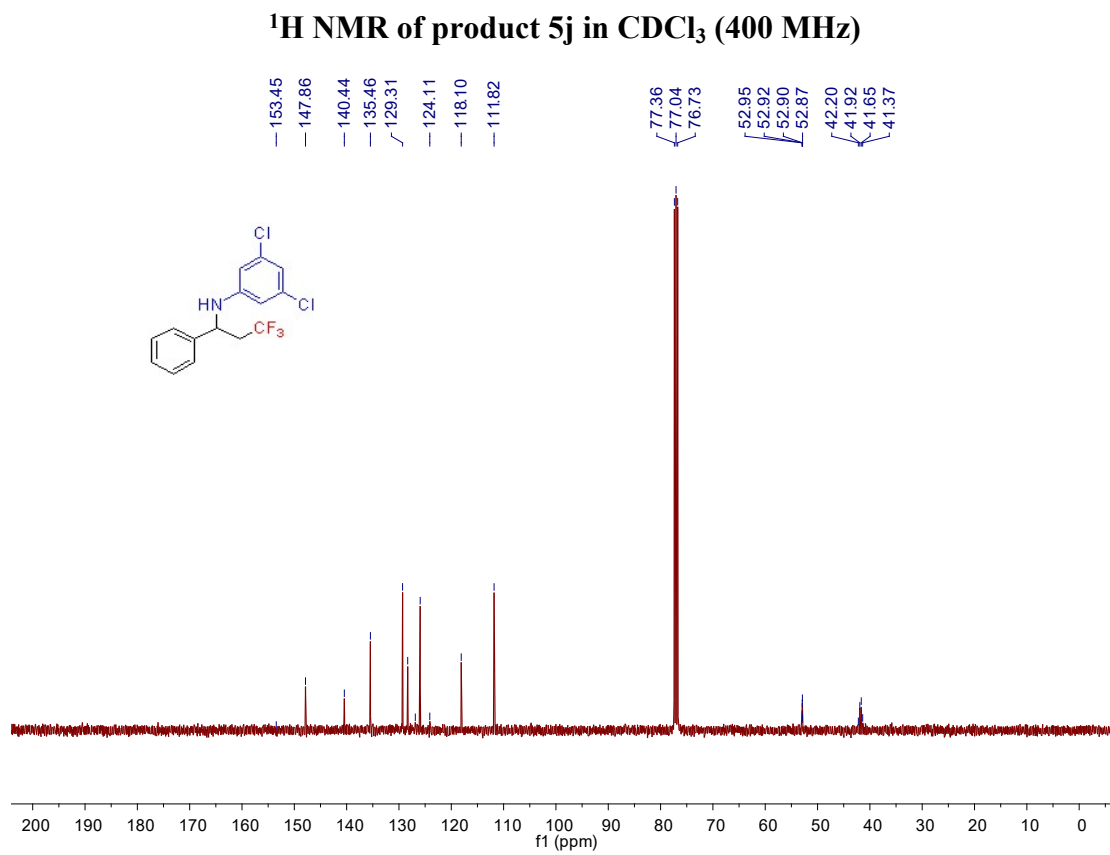

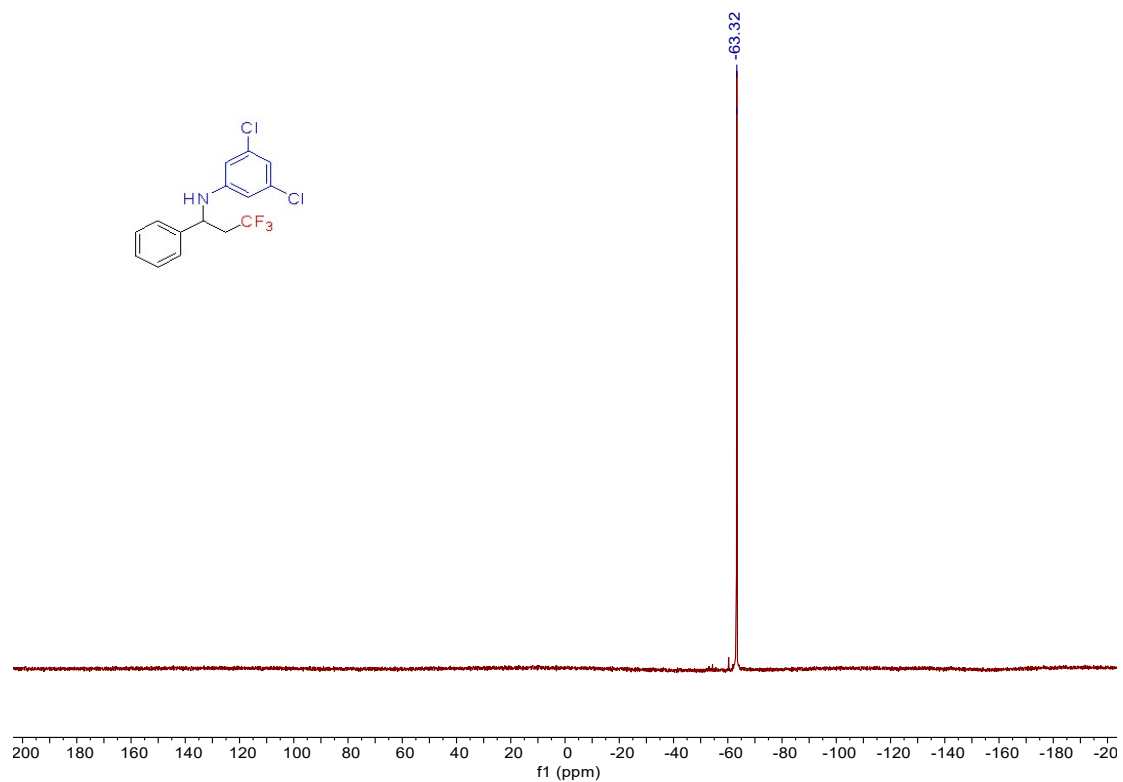

$^{19}\text{F}$  NMR of product 5j in  $\text{CDCl}_3$  (376 MHz)

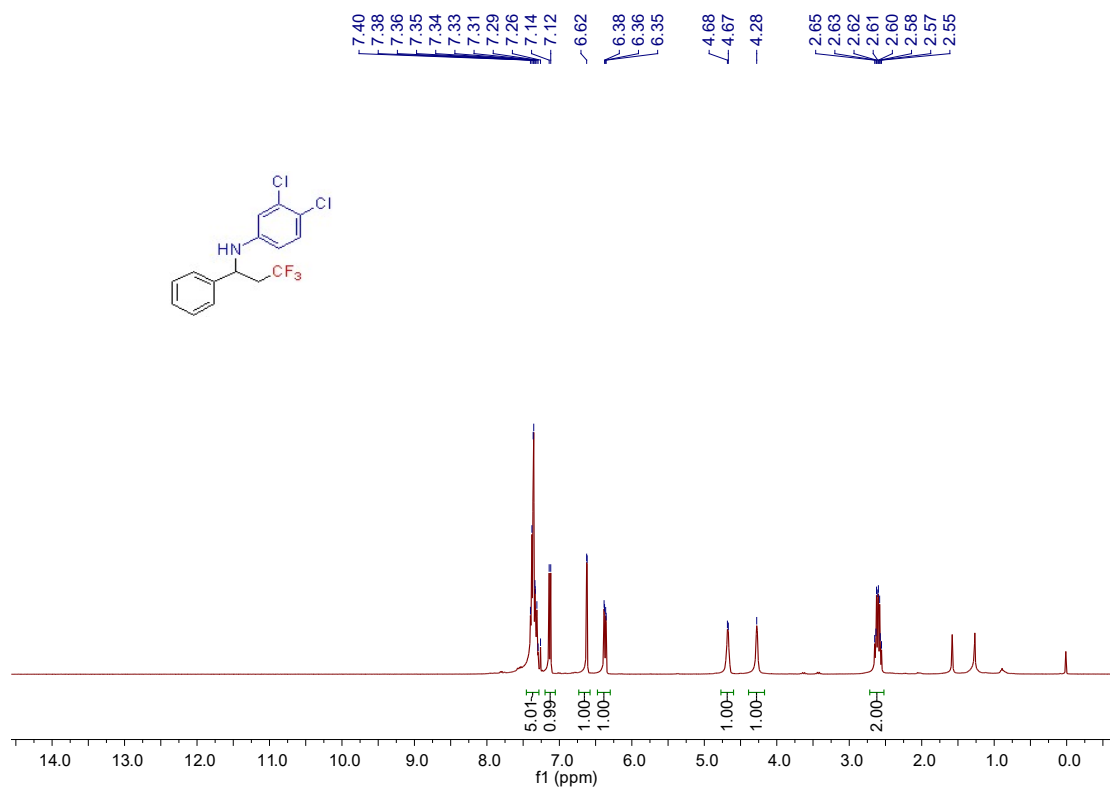

$^1\text{H}$  NMR of product 5k in  $\text{CDCl}_3$  (400 MHz)

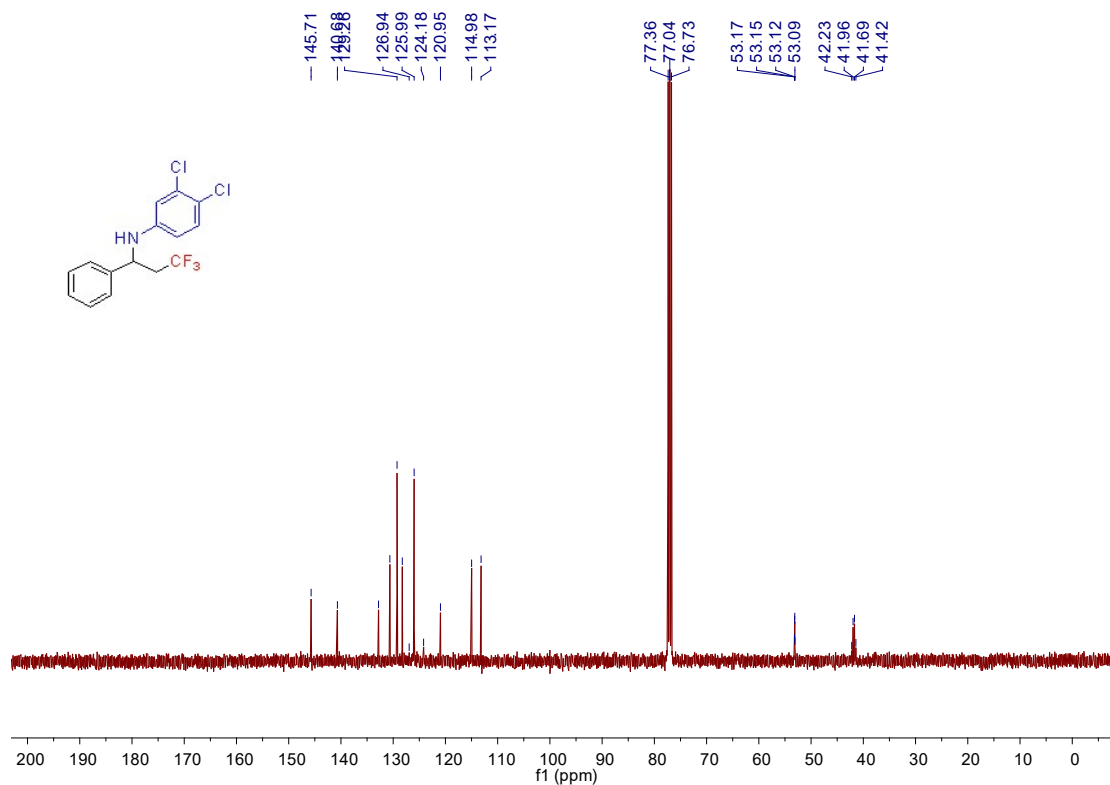

**<sup>13</sup>C NMR of product 5k in CDCl<sub>3</sub> (100 MHz)**

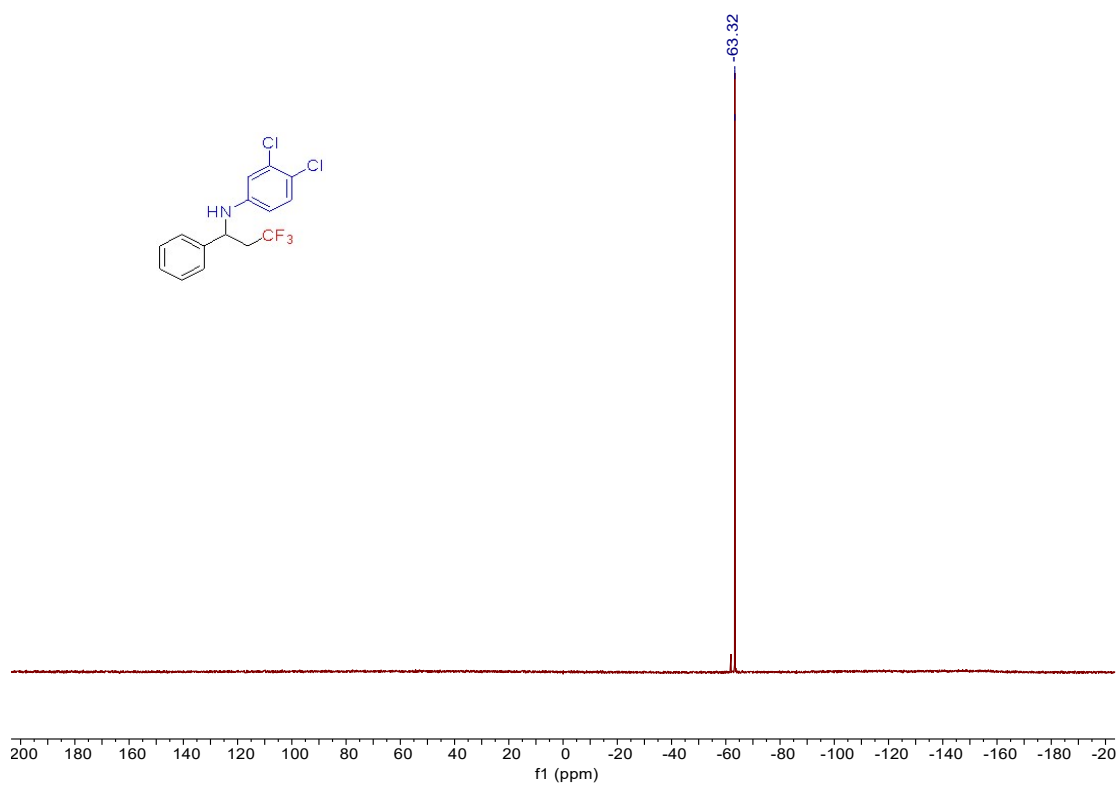

**<sup>19</sup>F NMR of product 5k in CDCl<sub>3</sub> (376 MHz)**

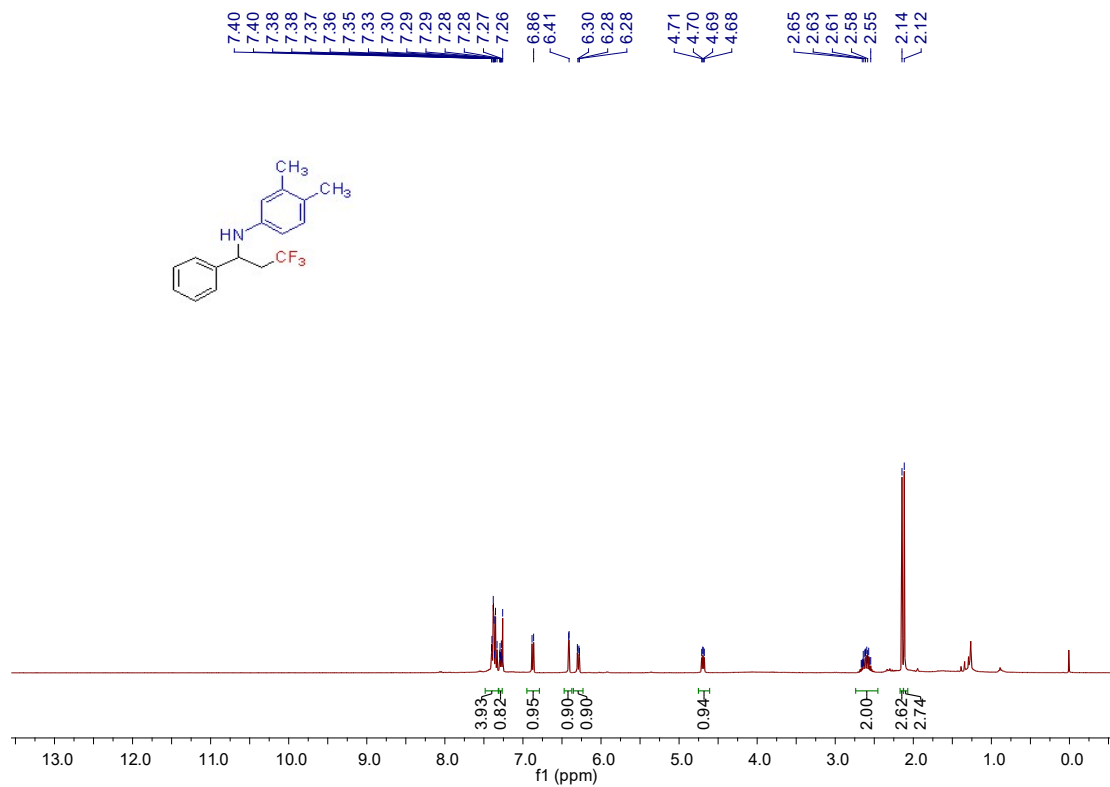

**<sup>1</sup>H NMR of product 5l in CDCl<sub>3</sub> (400 MHz)**

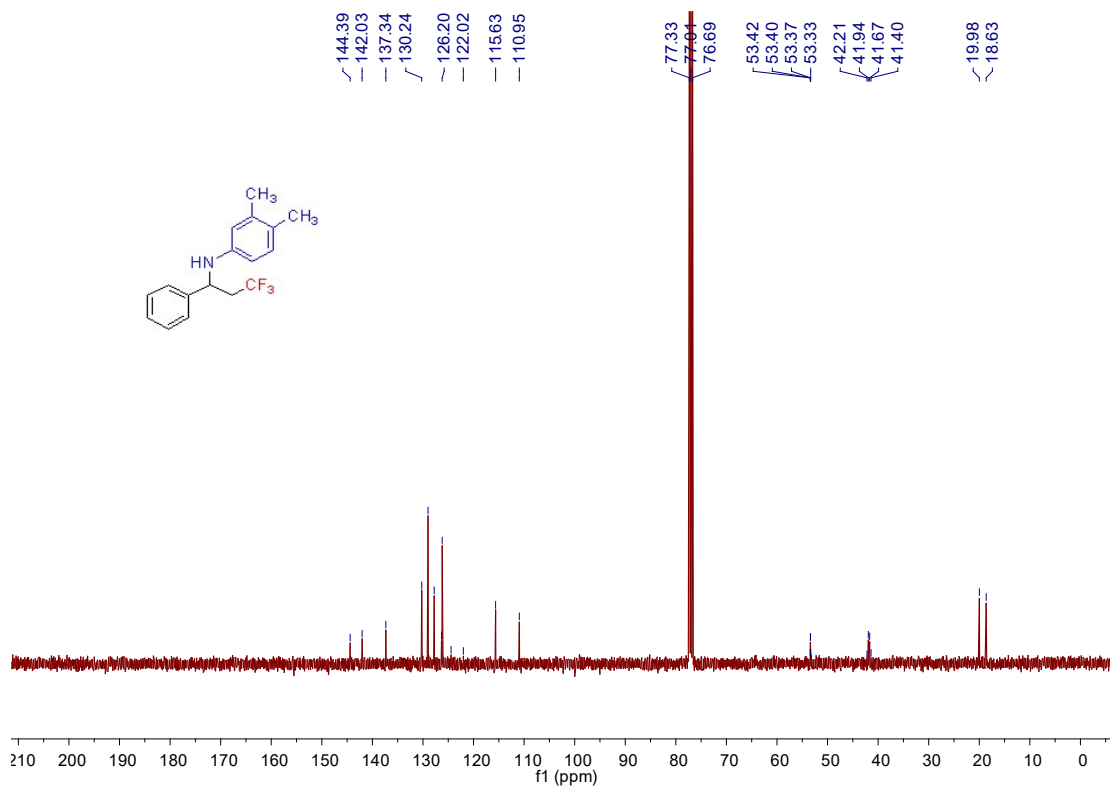

**<sup>13</sup>C NMR of product 5l in CDCl<sub>3</sub> (100 MHz)**

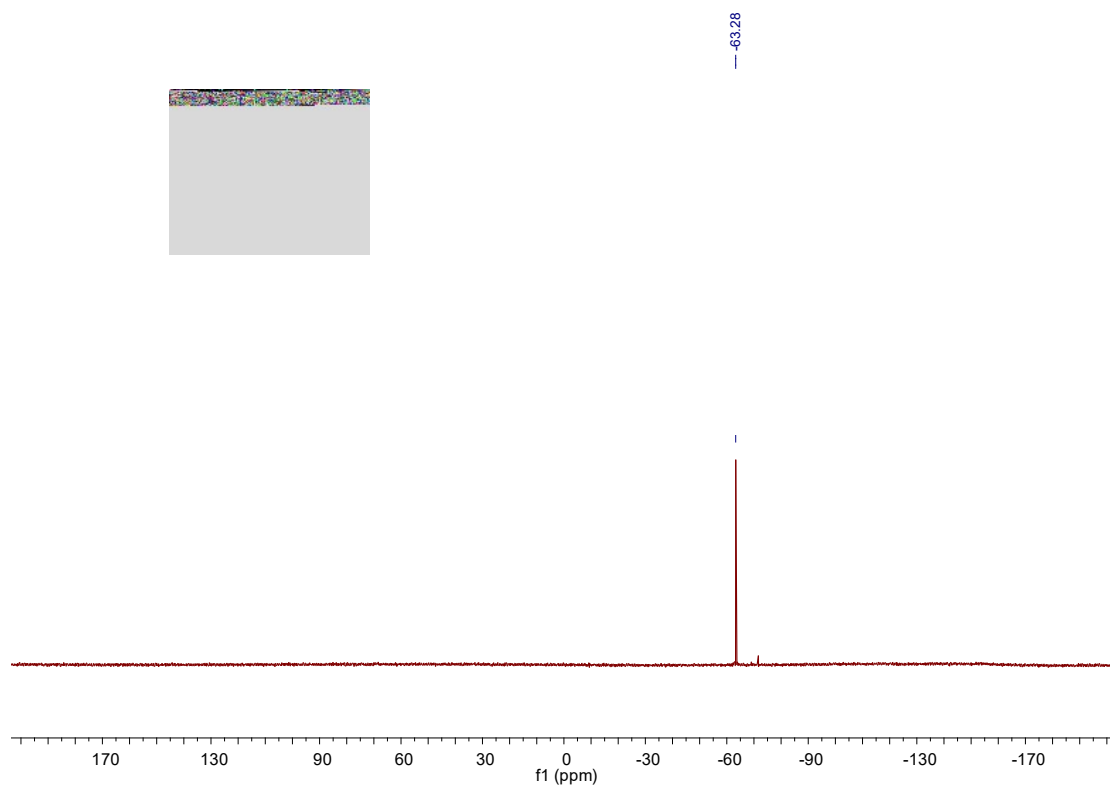

**$^{19}\text{F}$  NMR of product 5l in  $\text{CDCl}_3$  (376 MHz)**

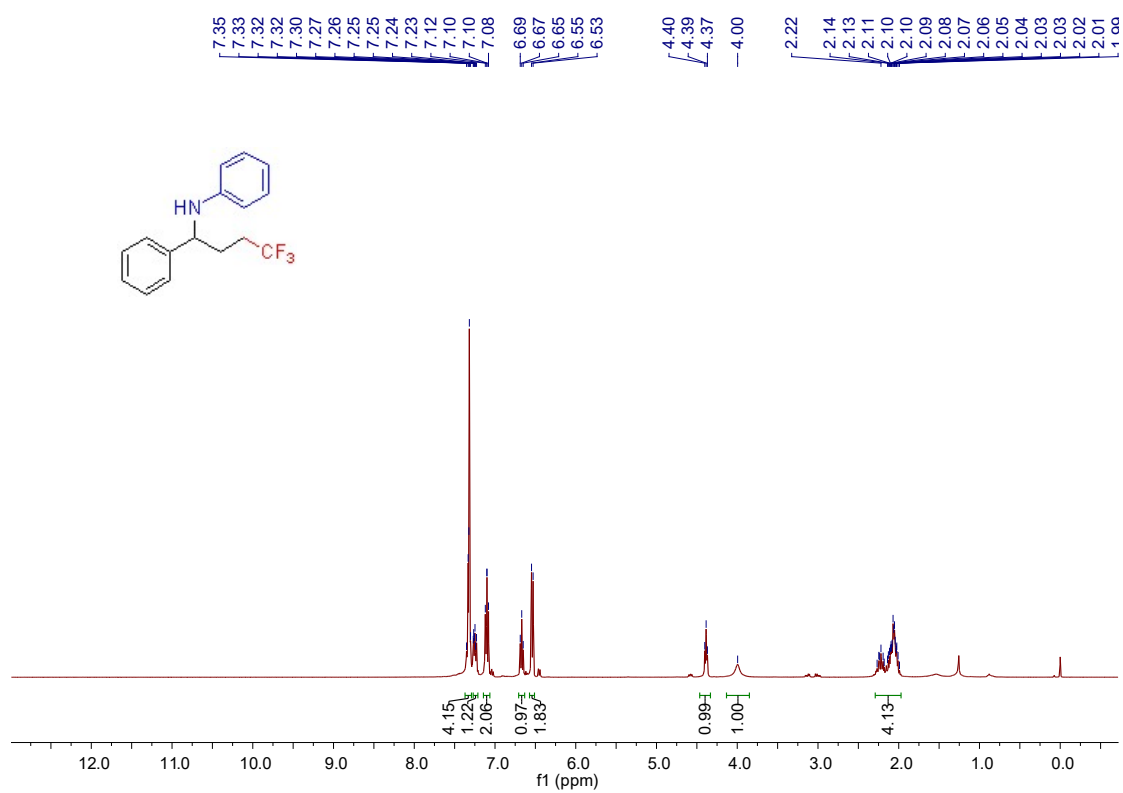

**$^1\text{H}$  NMR of product 7a in  $\text{CDCl}_3$  (400 MHz)**

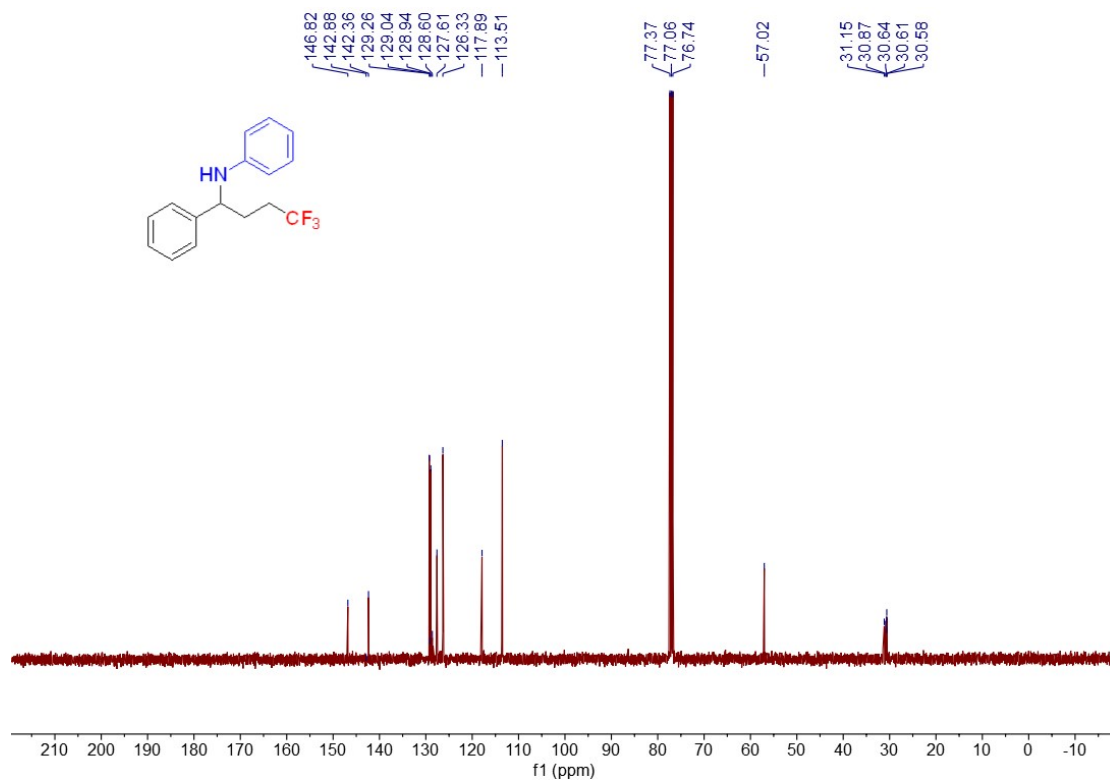

**<sup>13</sup>C NMR of product 7a in CDCl<sub>3</sub> (100 MHz)**

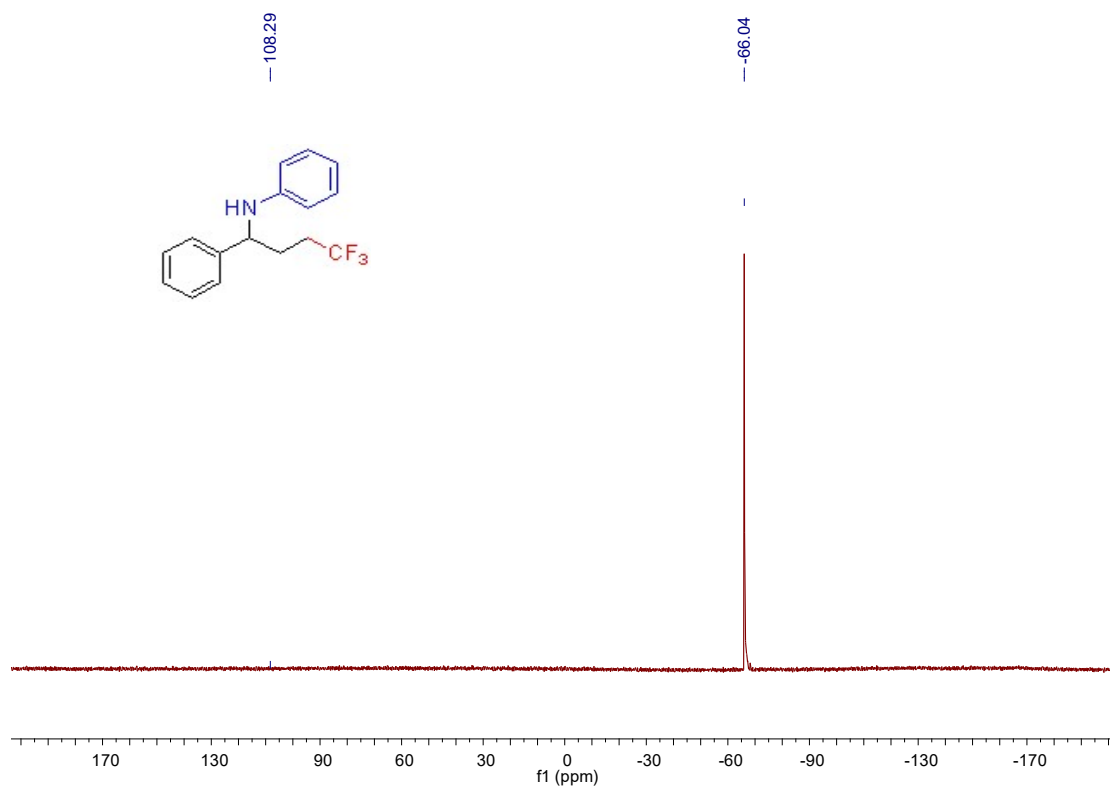

**<sup>19</sup>F NMR of product 7a in CDCl<sub>3</sub> (376 MHz)**

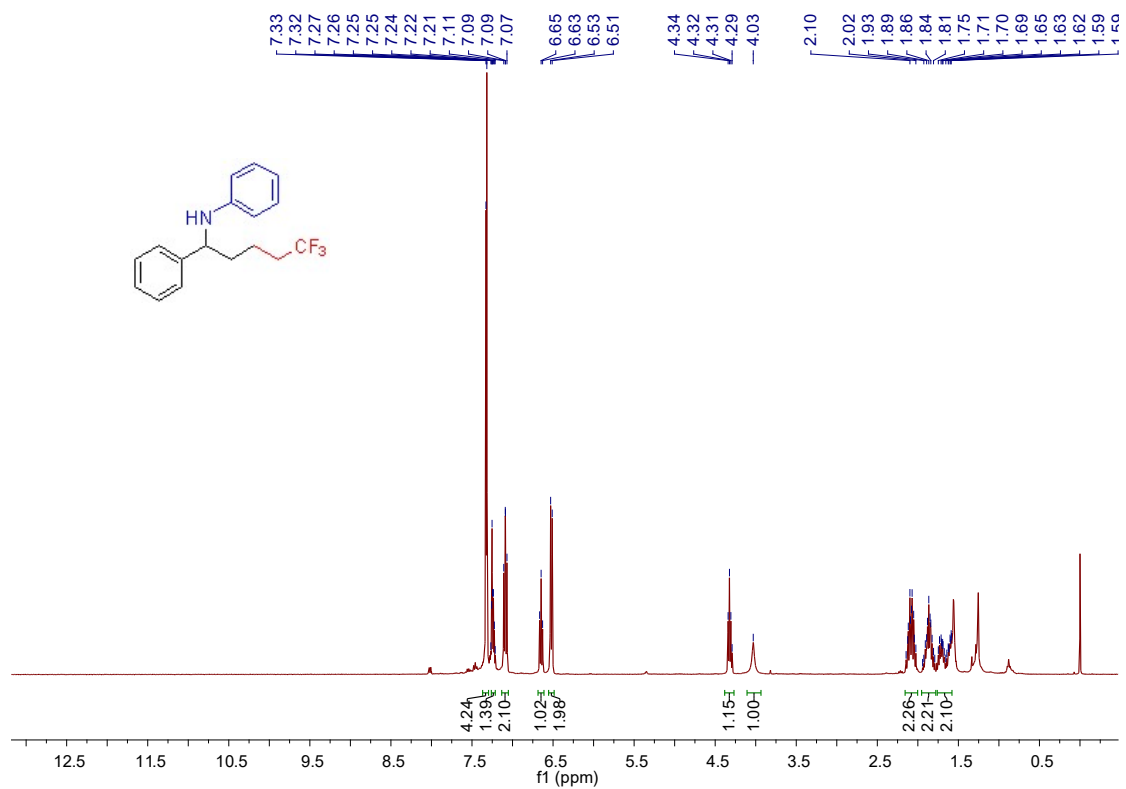

**<sup>1</sup>H NMR of product 7b in CDCl<sub>3</sub> (400 MHz)**

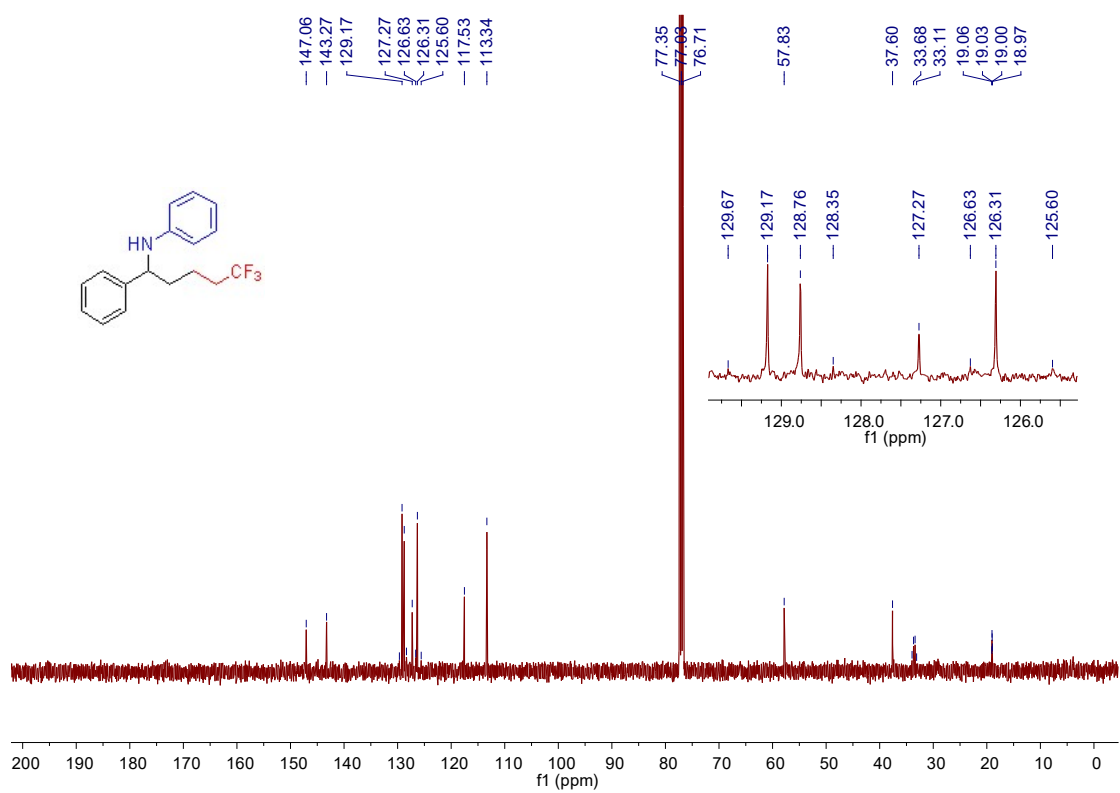

**<sup>13</sup>C NMR of product 7b in CDCl<sub>3</sub> (100 MHz)**

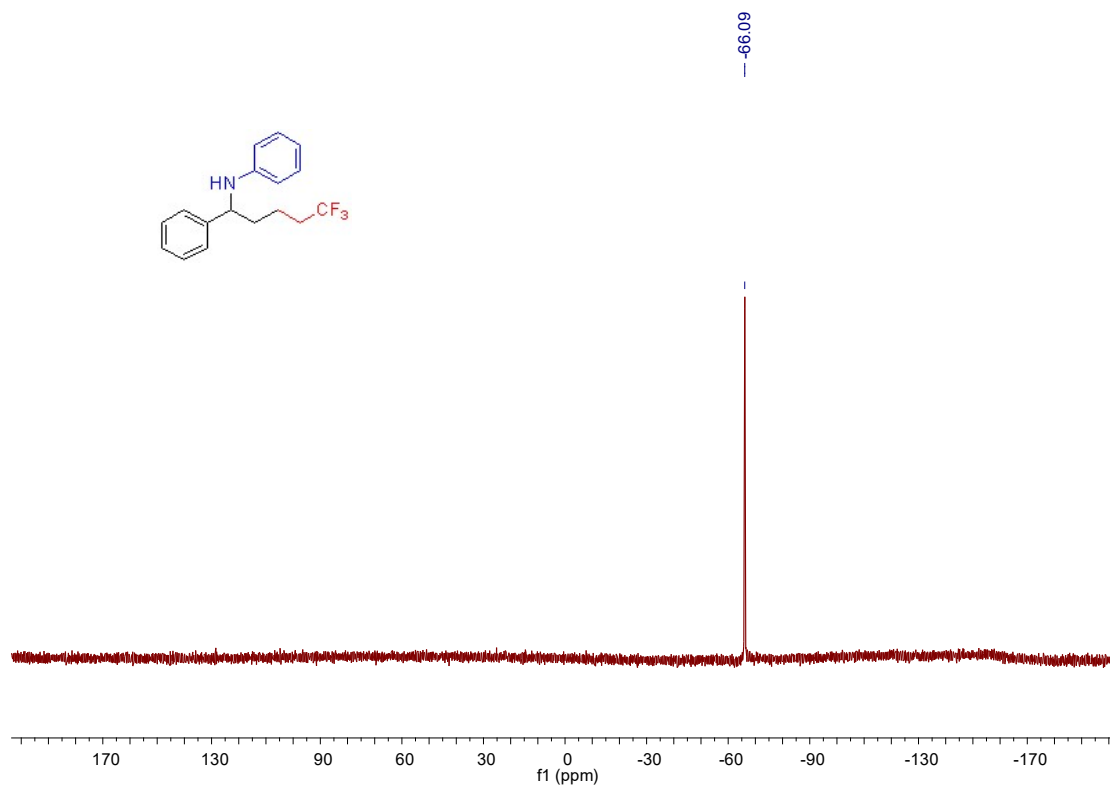

$^{19}\text{F}$  NMR of product 7b in  $\text{CDCl}_3$  (376 MHz)

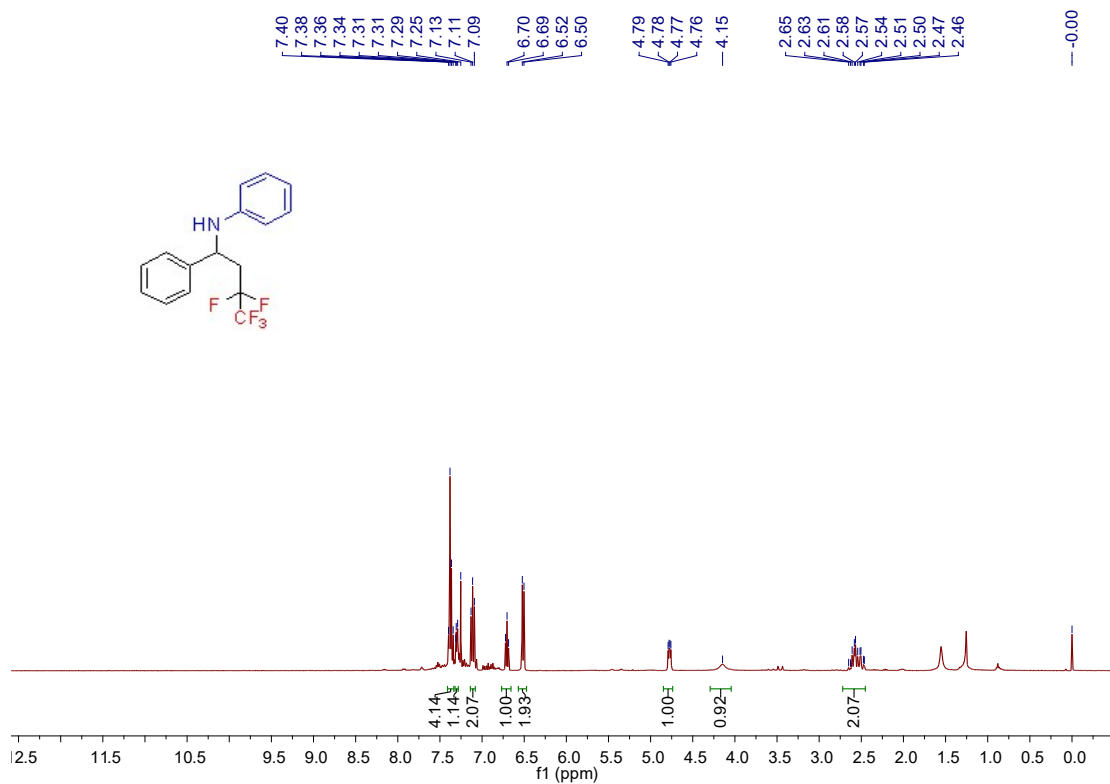

$^1\text{H}$  NMR of product 7c in  $\text{CDCl}_3$  (400 MHz)



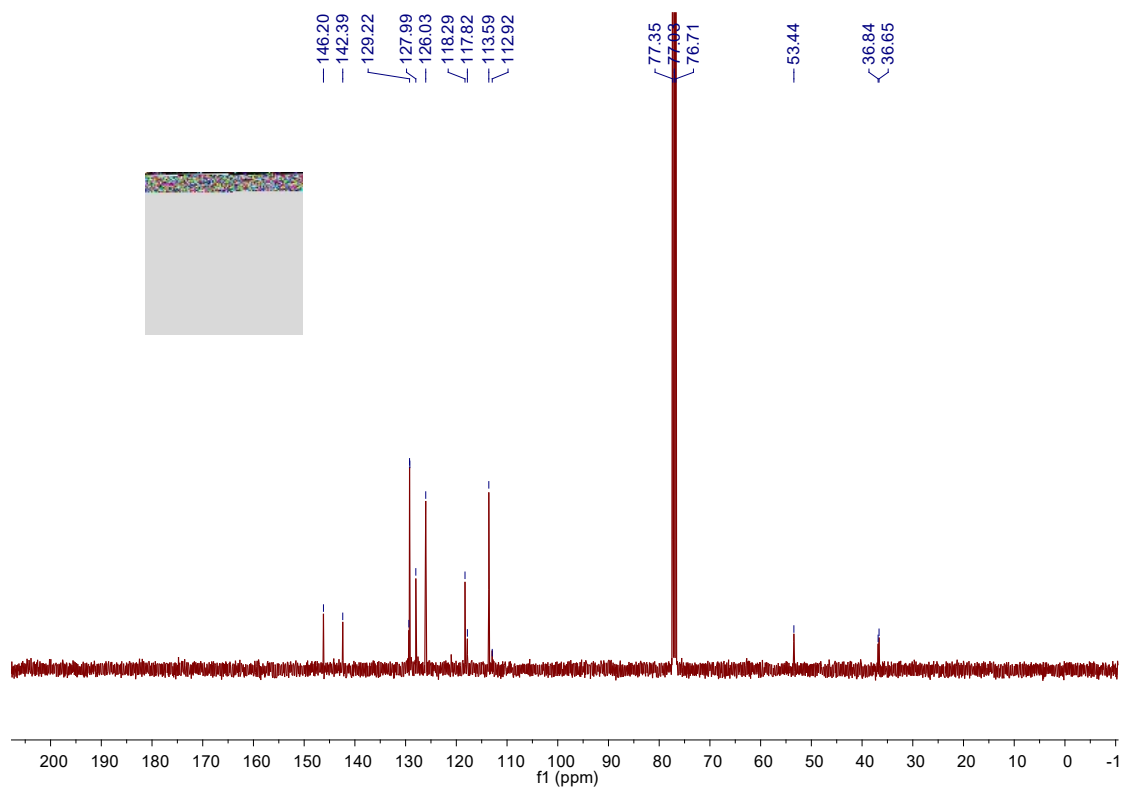

**$^{13}\text{C}$  NMR of product 7c in  $\text{CDCl}_3$  (100 MHz)**

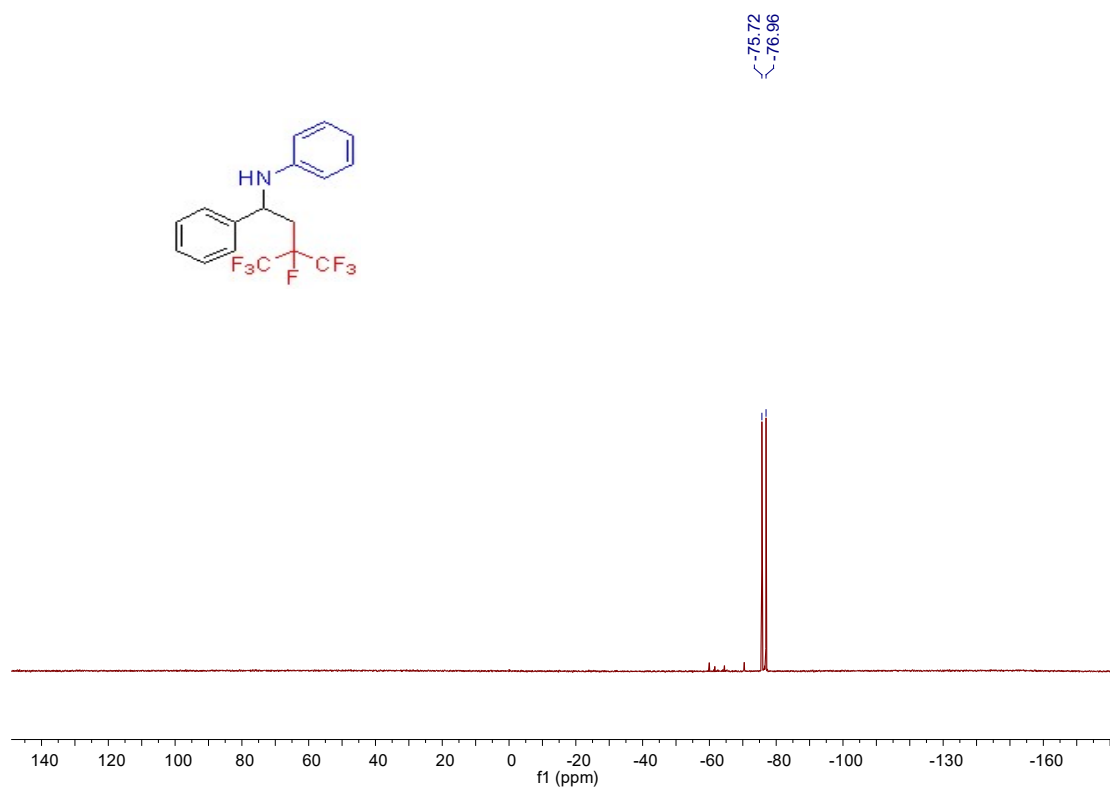

**$^{19}\text{F}$  NMR of product 7c in  $\text{CDCl}_3$  (376 MHz)**
